# Supplementary material for: A post-synthetically modified metal–organic framework for copper catalyzed denitrative C–N coupling of nitroarenes under heterogeneous conditions
Source: Royal Society of Chemistry journal article supplement (doi:10.1039/d0nj05711h), 2021-01-01

## Electronic Supplementary Information

# Post Synthetically Modified Metal–Organic Framework for Copper Catalyzed Denitrative C-N Coupling of Nitroarenes under Heterogeneous Condition

Tanmoy Maity,<sup>a,b</sup> Pamei Ghosh,<sup>a</sup> Soma Das,<sup>a</sup> Debraj Saha,<sup>a,c</sup> and Subratanath Koner<sup>a\*</sup>

<sup>a</sup> Department of Chemistry, Jadavpur University, 188, Raja S. C. Mullick Road, Jadavpur, Kolkata 700 032 (India), E-mail: [subratan.koner@jadavpuruniversity.in](mailto:subratan.koner@jadavpuruniversity.in)

<sup>b</sup> Solid State and Structural Chemistry Unit, Indian Institute of Science, Bangalore, Karnataka 560012, India.

<sup>c</sup> Department of Chemistry, Darjeeling Government College, Darjeeling 734101, India.

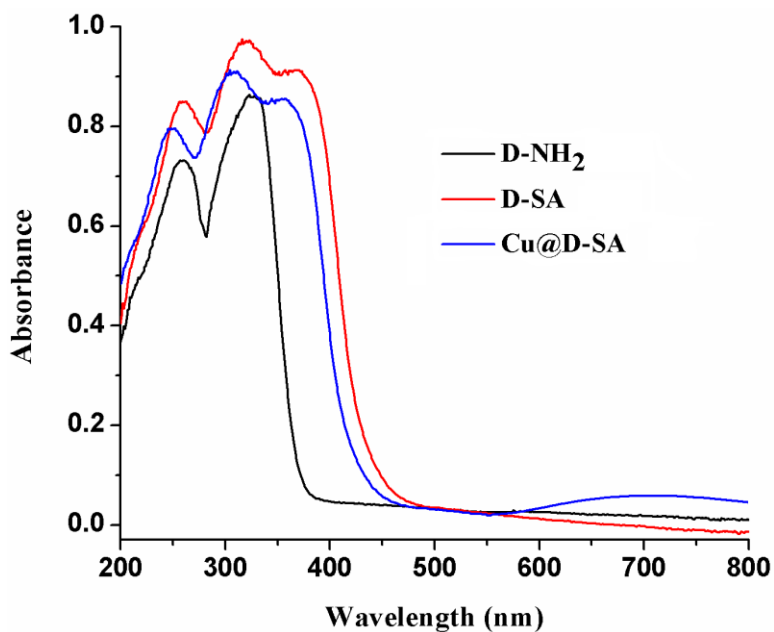

Fig. S1 Solid state diffuse reflectance UV-Vis spectra of D-NH<sub>2</sub>, D-SA and Cu@D-SA.

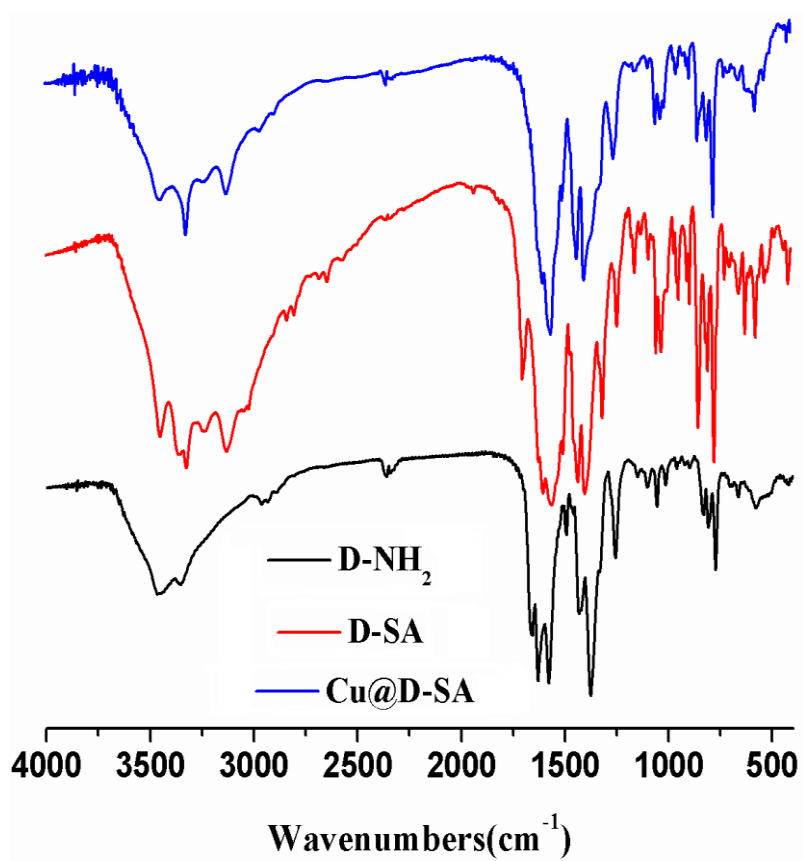

**Fig. S2** FTIR spectra of D-NH<sub>2</sub>, D-SA and Cu@D-SA.

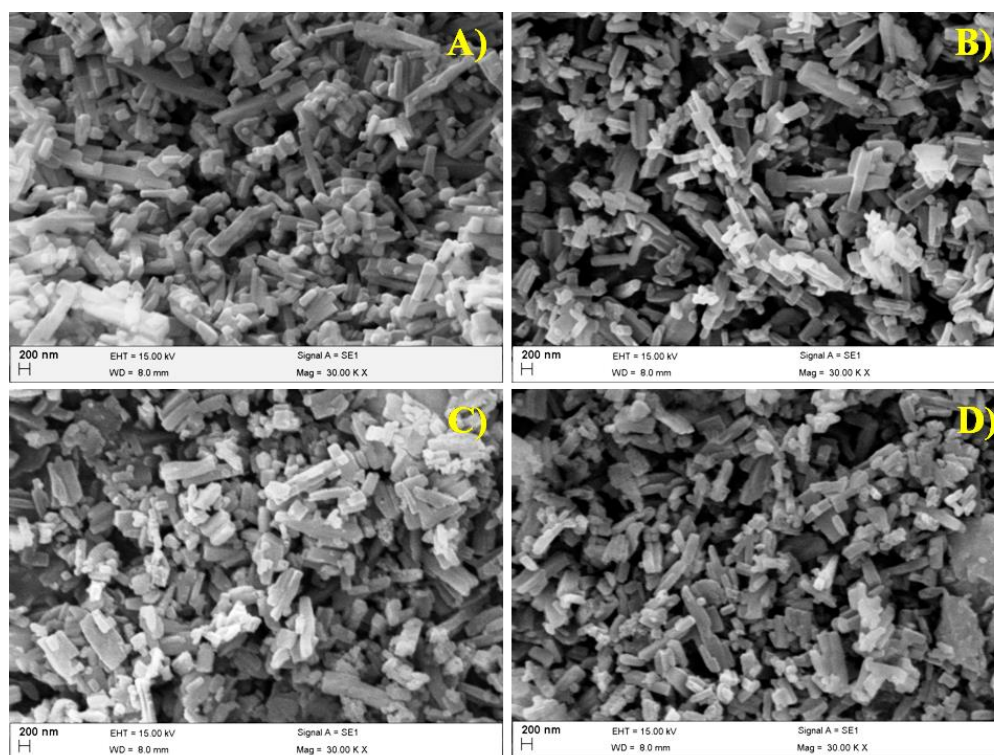

**Fig. S3** SEM image of A) D-NH<sub>2</sub>, B) D-SA, C) Cu@D-SA (unreacted) and D) Cu@D-SA (recovered after 5th cycle).

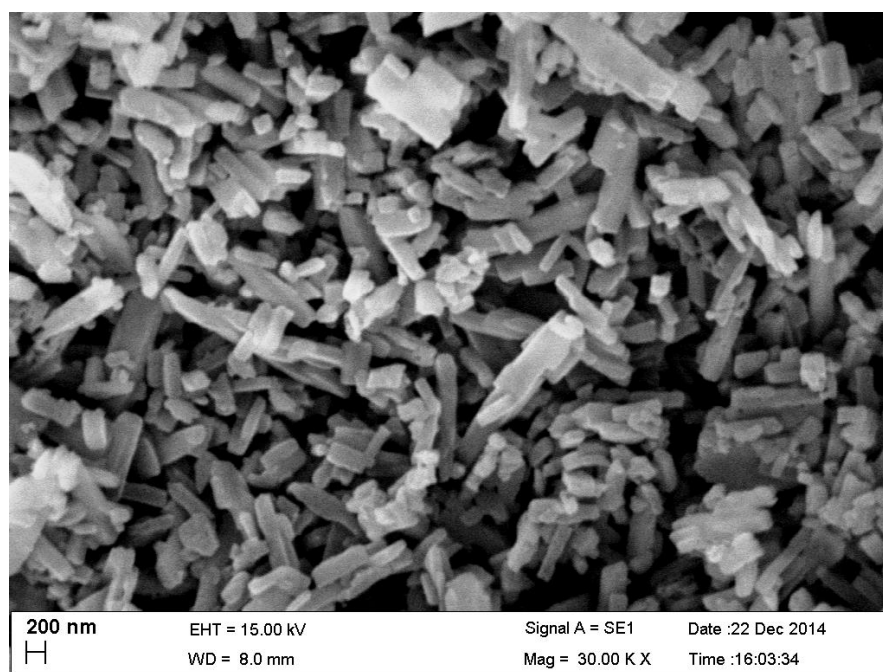

**Fig. S4** SEM image of Cu@D-SA (recovered after 10th cycle)

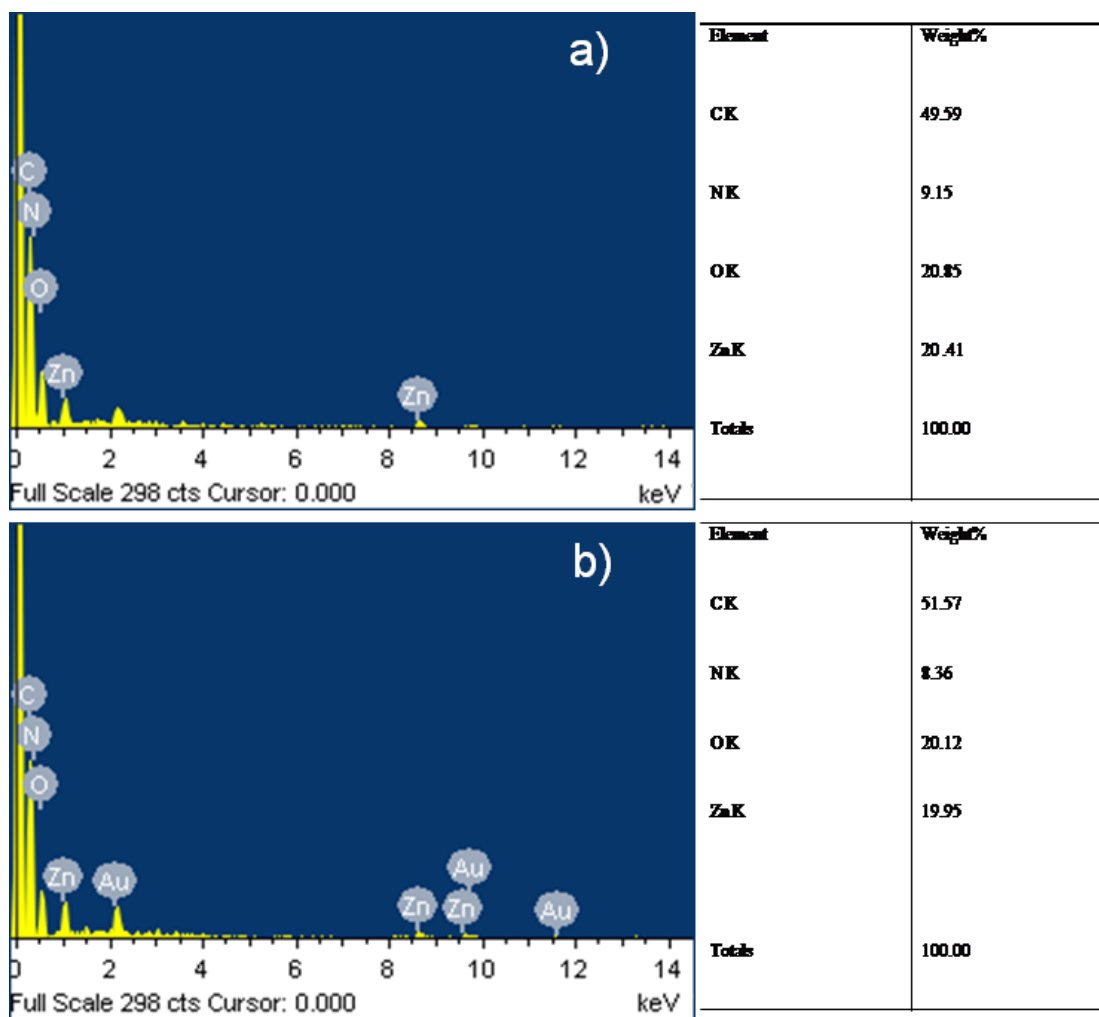

**Fig. S5** EDS elemental analysis of a) D-NH<sub>2</sub> and B) D-SA. Au is present in spectra due to gold coating.

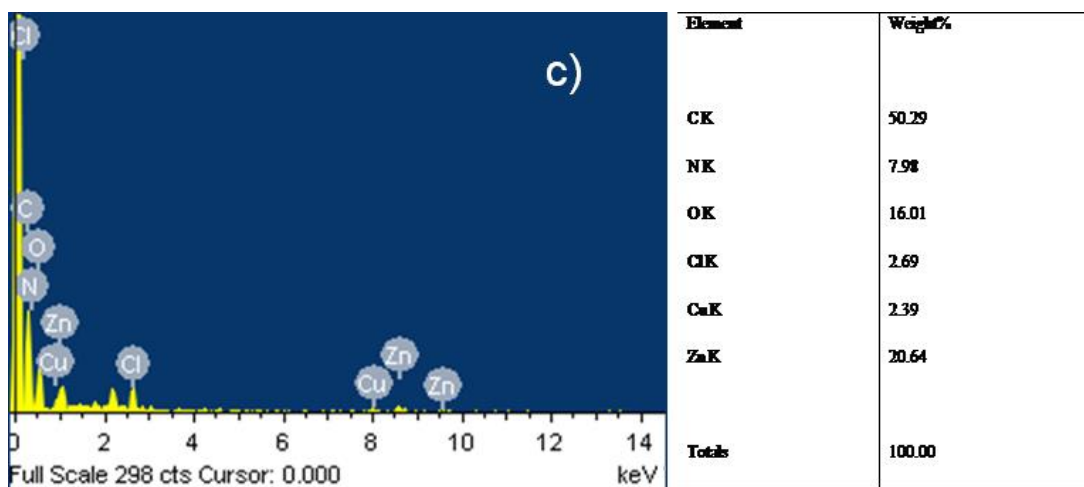

Fig. S6 EDS elemental analysis of c) Cu@D-SA.

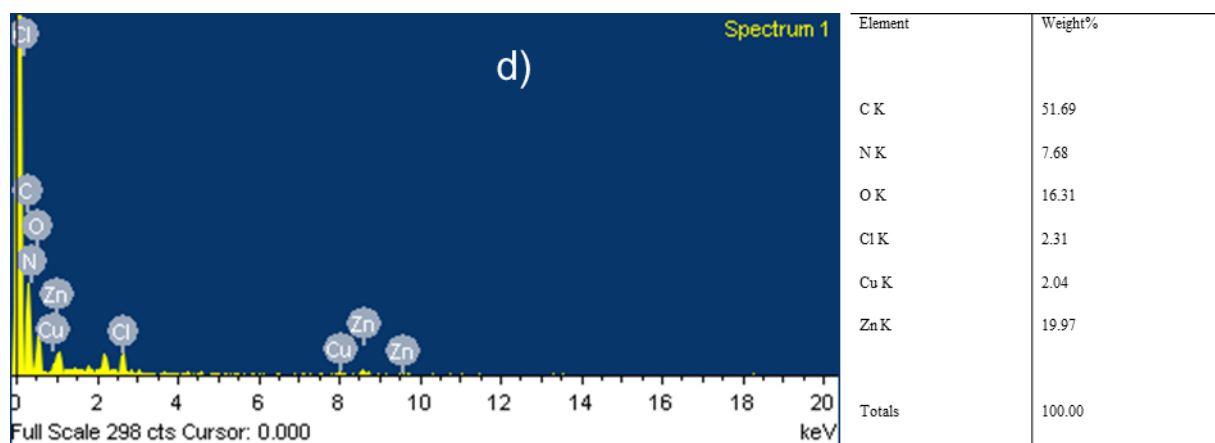

Fig. S7 EDS elemental analysis of d) Cu@D-SA recovered after 10<sup>th</sup> catalytic cycles.

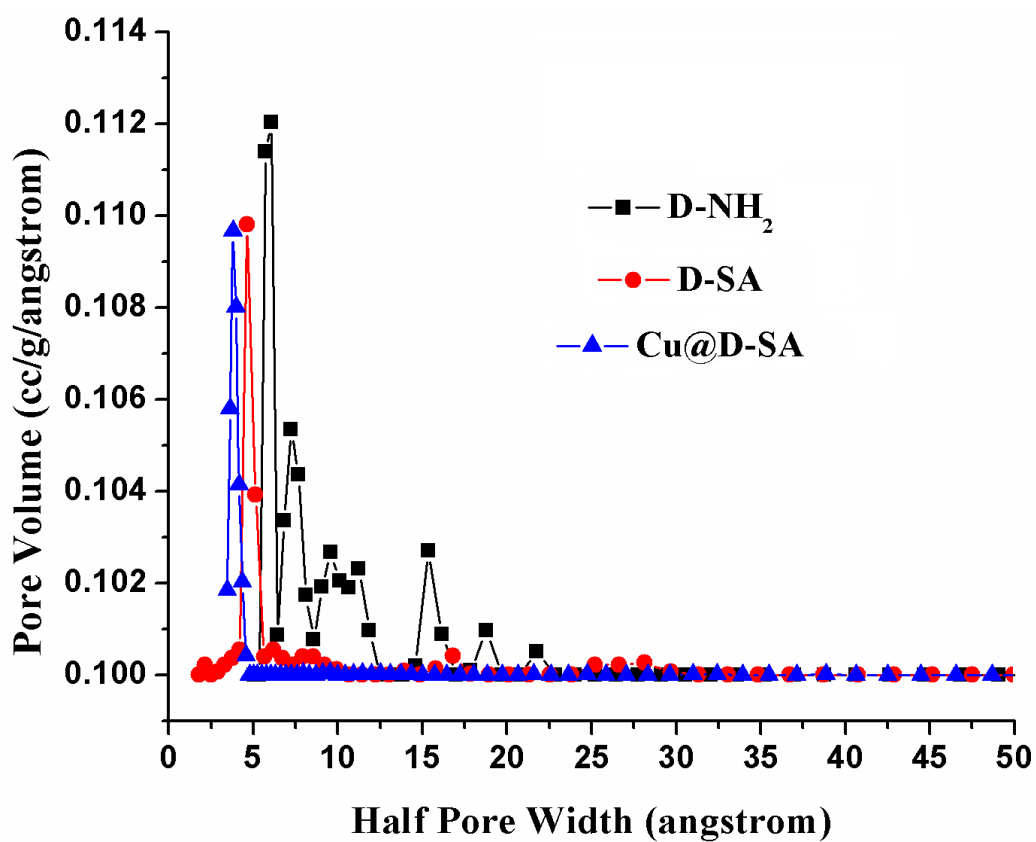

**Fig. S8** Pore size distribution of 1) D-NH<sub>2</sub> (half pore width – 6.1 Å), 2) D-SA (half pore width – 4.6 Å) and 3) Cu@D-SA (half pore width – 3.7 Å).

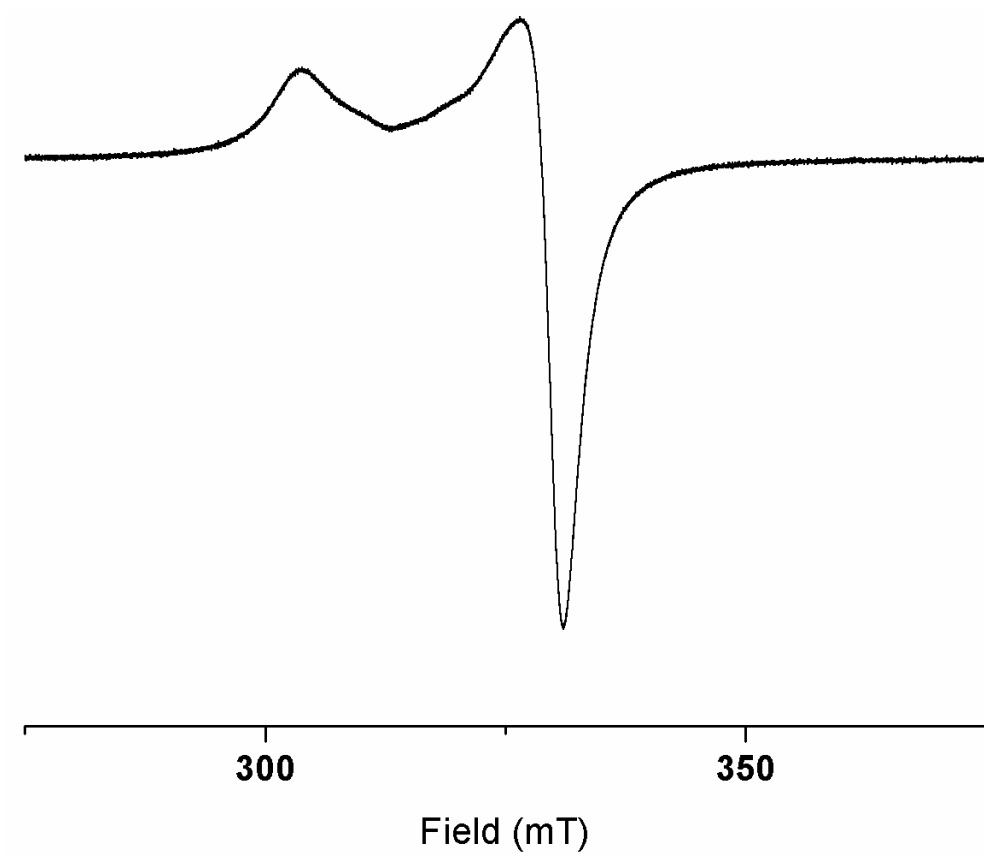

**Fig. S9** X-band EPR spectrum of the catalyst Cu@D-SA.

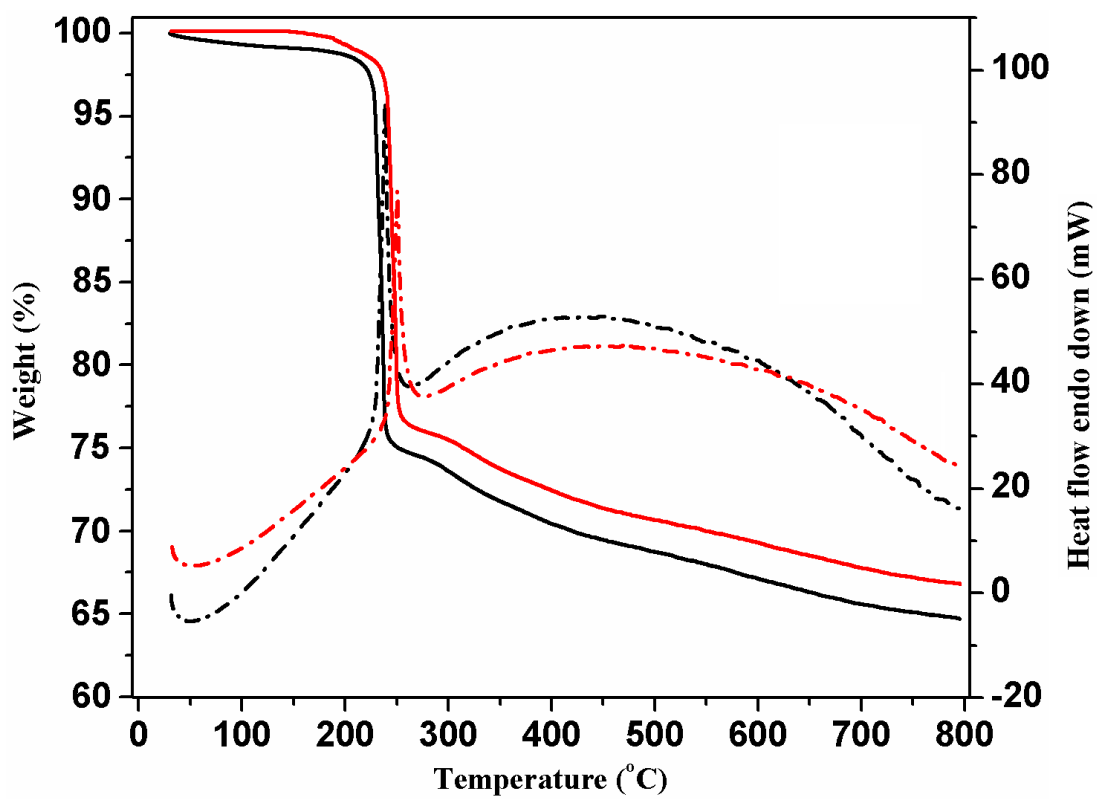

**Fig. S10** TG(—)/DTA(— - —) curve for a) Cu@D-SA (black) and b) dehydrated ( $10^{-2}$  Torr, 4 hours at 90 °C) Cu@D-SA (red).



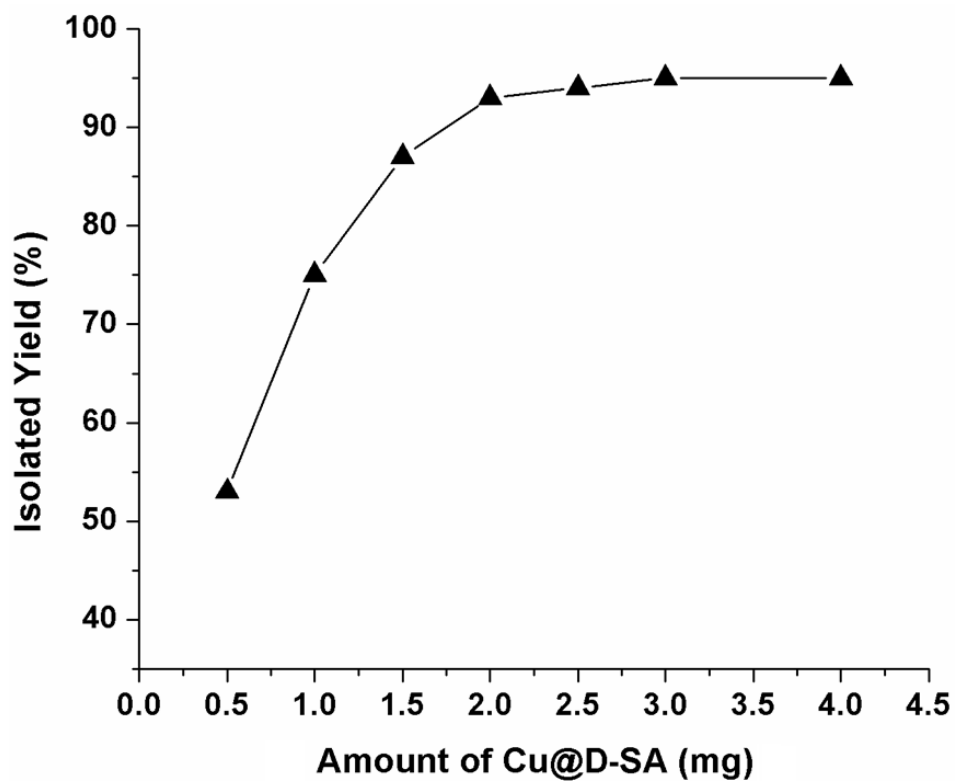

**Fig. S11** Plot showing progress of reaction for optimization of amount of catalyst Cu@D-SA in N-arylation reaction of 1,4-dinitrobenzene with pyrazole.

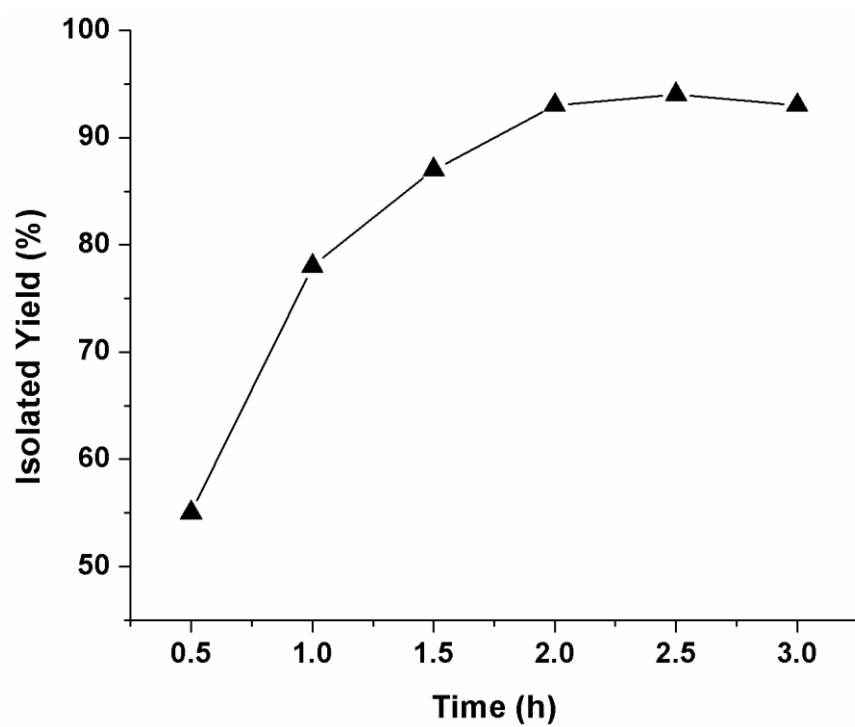

Fig. S12 Reaction propagation plot for N-arylation reaction of 1,4-dinitrobenzene with pyrazole.

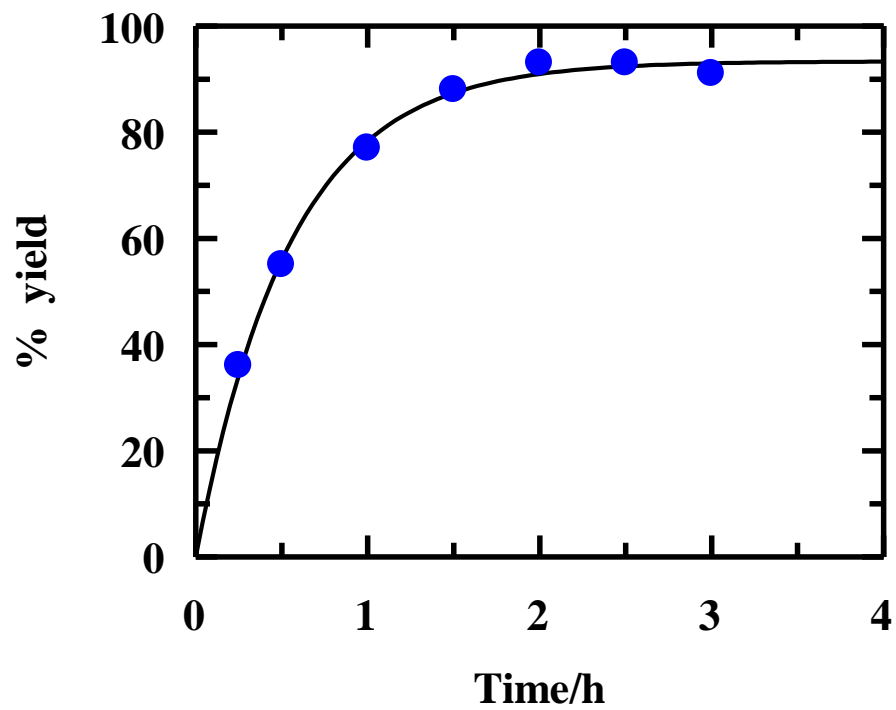

**Fig. S13** Plot showing fitting of first order rate equation of N-arylation reaction of 1,4-dinitrobenzene with pyrazole (Rate equation,  $C_0 - C = C_0[1 - e^{-kt}]$  gives  $k = 1.83 \text{ h}^{-1}$  and  $t_{1/2} \approx 0.4 \text{ h}$ ).

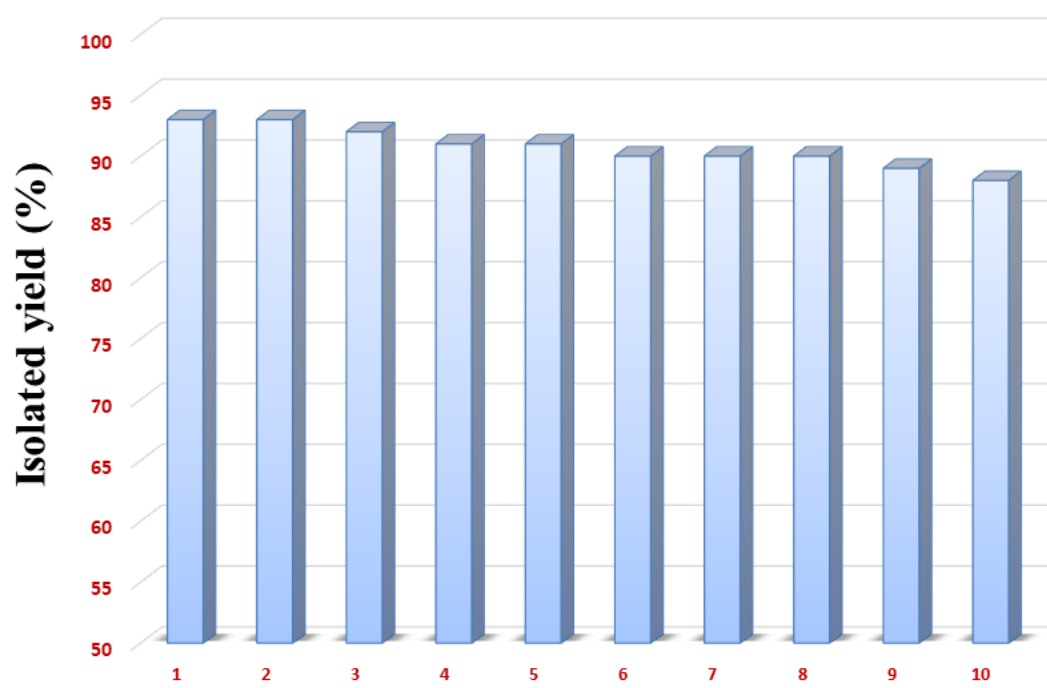

**Fig. S14** Recycling of the catalyst (up to 10 successive cycles).

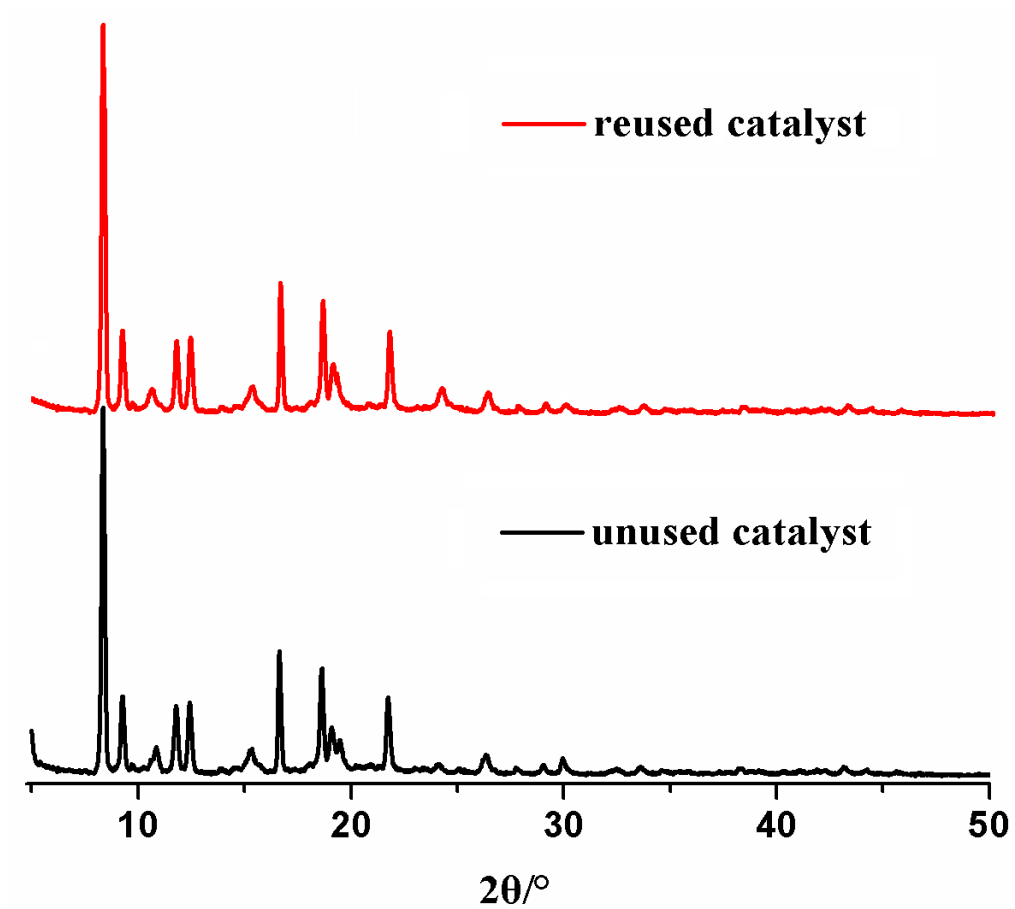

Fig. S15 PXRD of Cu@D-SA before and after catalytic reaction.

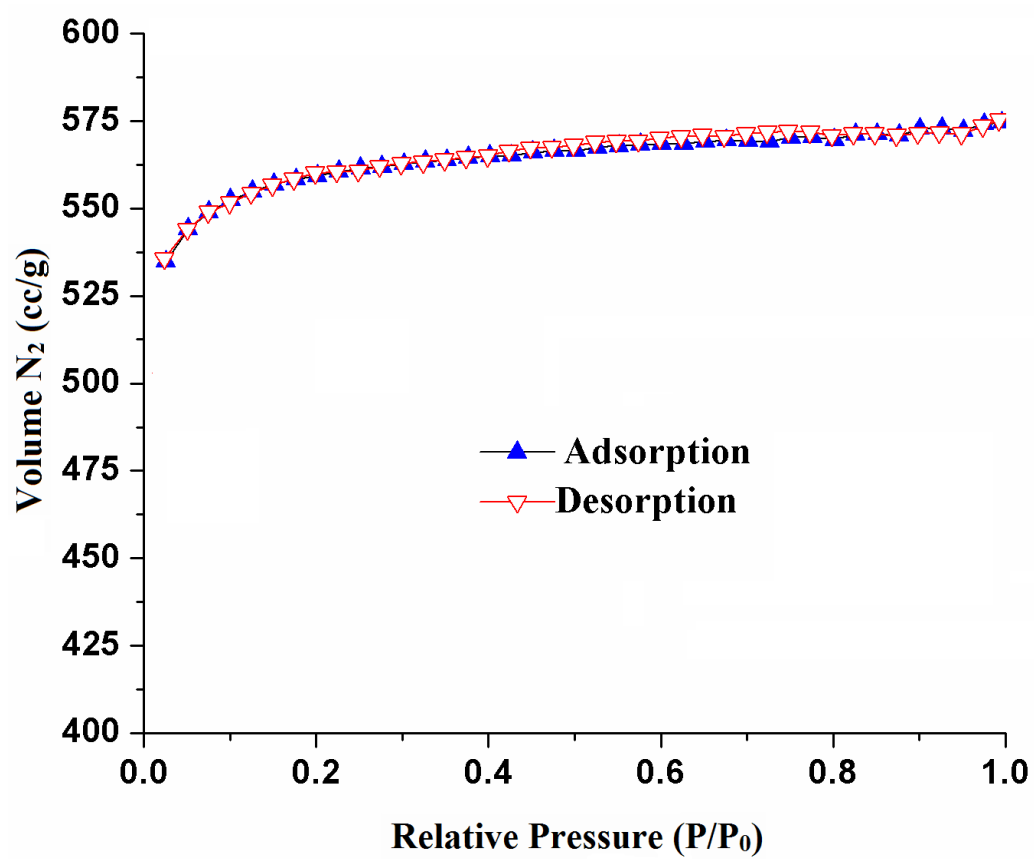

**Fig. S16** N<sub>2</sub> adsorption isotherm at 77 K of recovered Cu@D-SA catalyst after fifth cycles (BET – 1518 cm<sup>2</sup>/g).

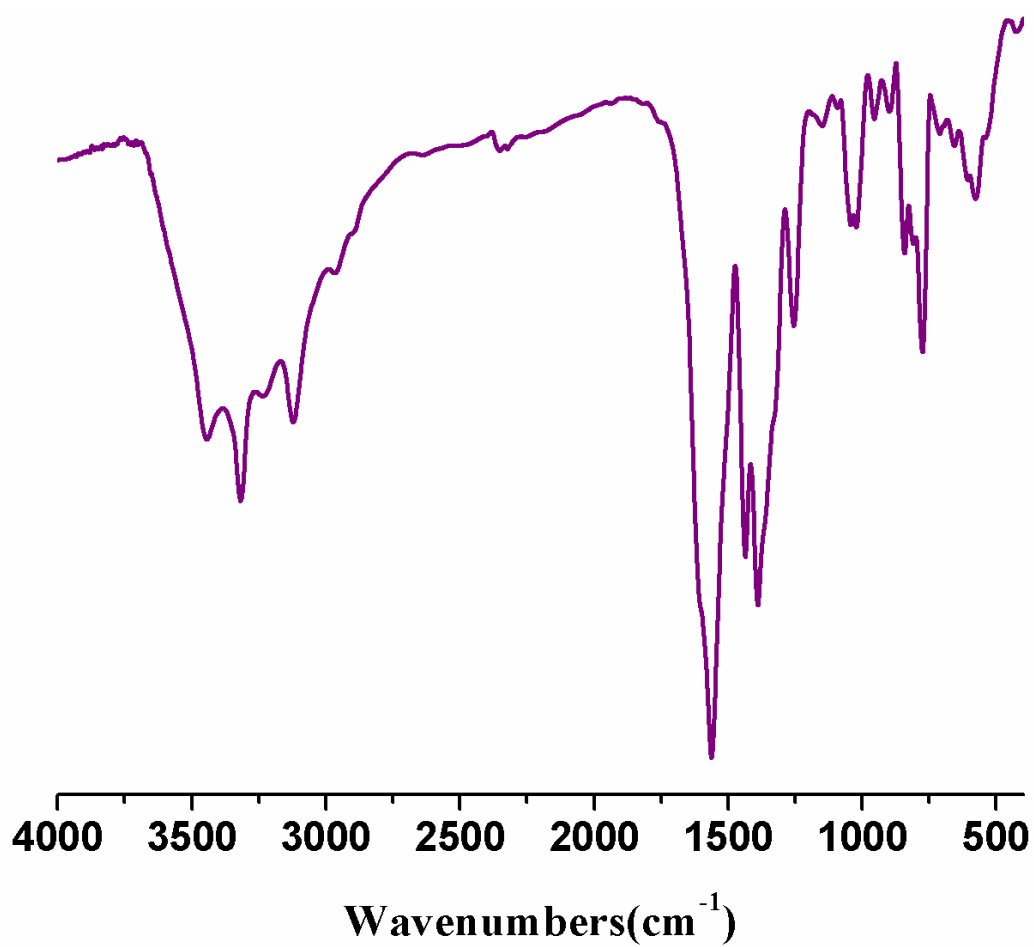

**Fig. S17** FTIR spectrum of Cu@D-SA (recovered after fifth cycle catalytic reaction).

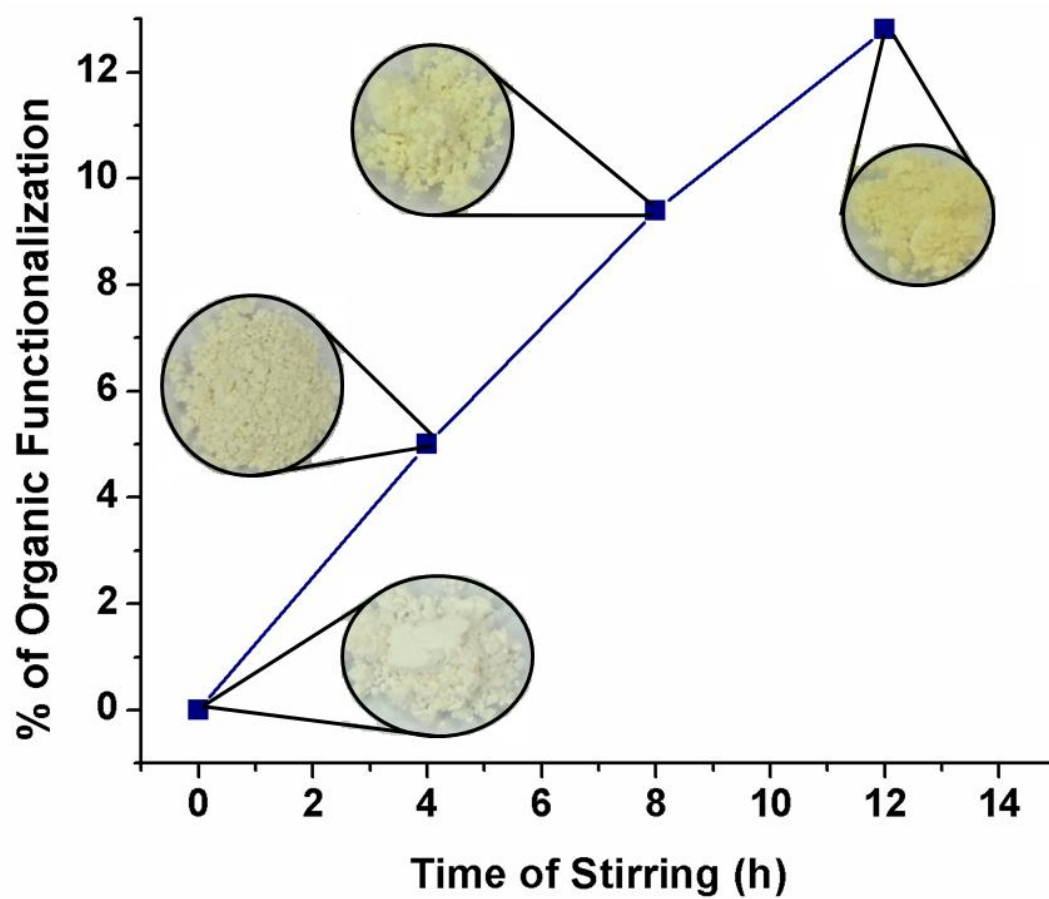

Fig. S18 Plot showing amine functionalization in DMOF-NH<sub>2</sub> along with visual color change.



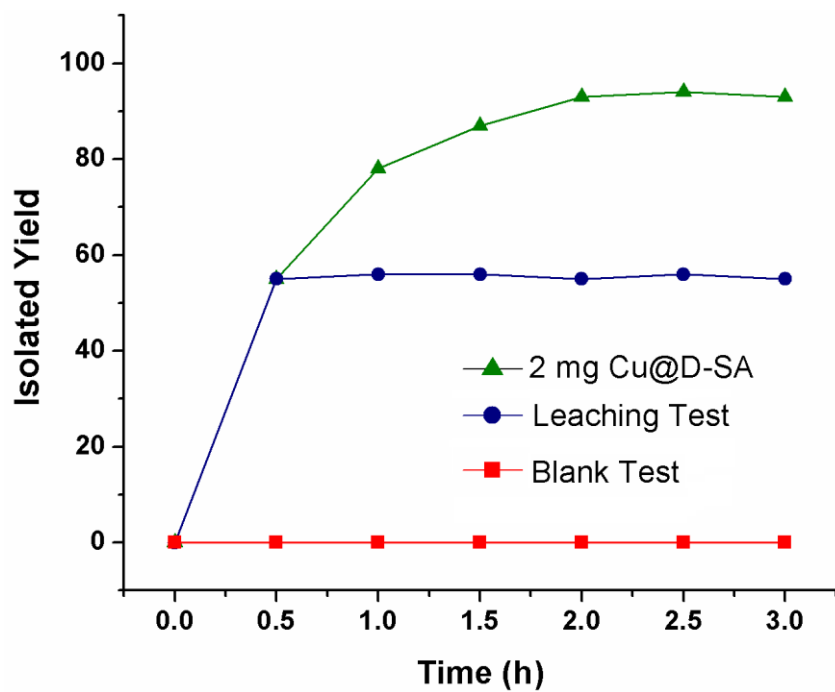

**Fig. S19** Plot supporting no leaching of copper from the catalyst.

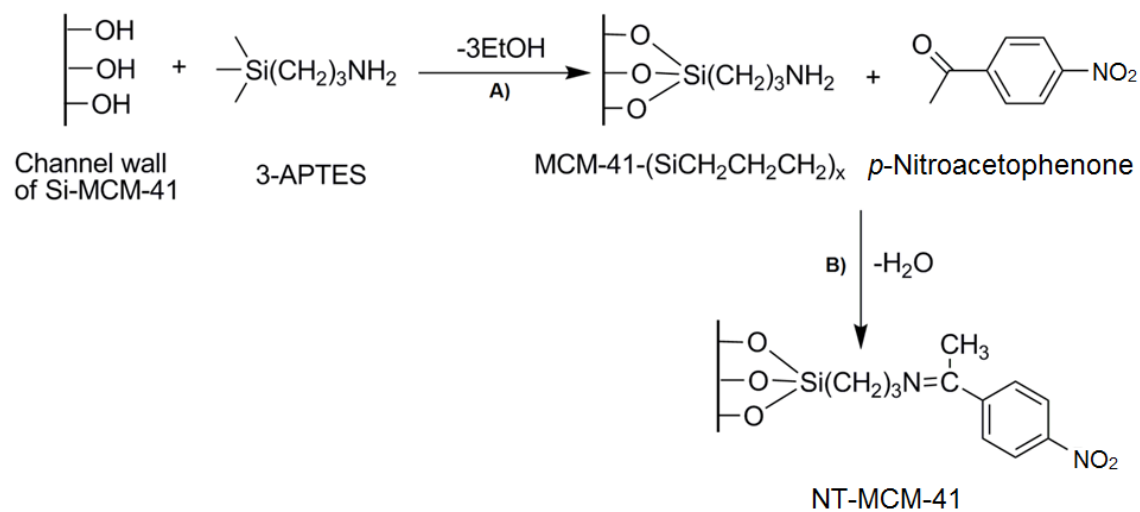

**Scheme S1** A) Organic modification of Si-MCM-41: APTES/CHCl<sub>3</sub> and B) anchoring of *p*-nitroacetophenone onto MCM-41(in ethanol).

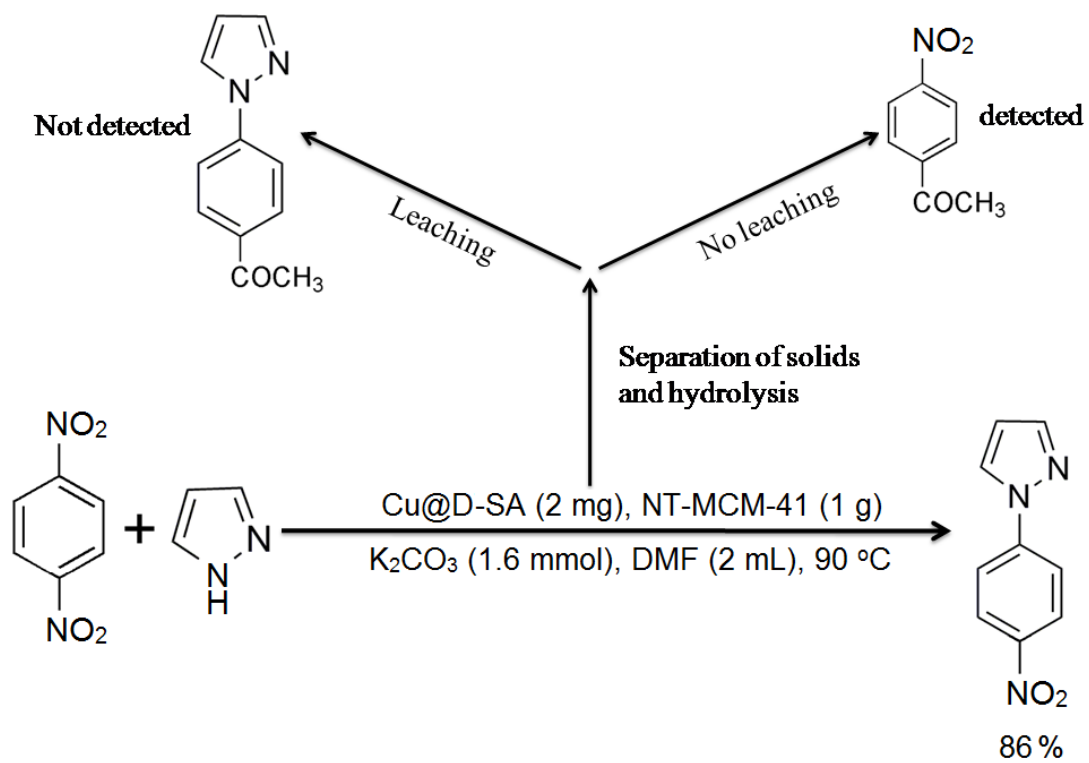

**Scheme S2** Three-phase test for N-arylation reaction.

**Table S1** Optimization of reaction condition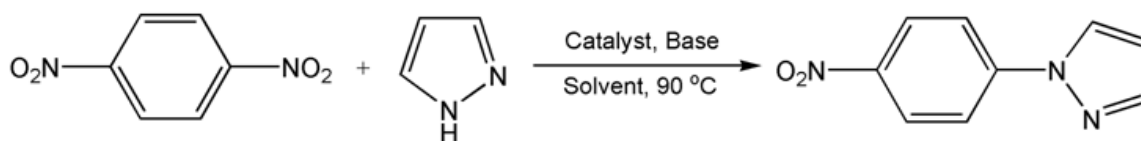

S1a = Cu@D-SA  
 S1b = DMOF-NH<sub>2</sub>  
 S1c = DMOF-NH<sub>2</sub>+CuCl<sub>2</sub>·2H<sub>2</sub>O  
 S1d = DMOF-SA+CuCl<sub>2</sub>·2H<sub>2</sub>O  
 S1e = Cu(NO<sub>3</sub>)<sub>2</sub>·3H<sub>2</sub>O  
 S1f = Cu(OAc)<sub>2</sub>·H<sub>2</sub>O  
 S1g = CuCl<sub>2</sub>·2H<sub>2</sub>O

| Entry <sup>a</sup> | Catalyst | Base                            | Solvent | Yield <sup>b</sup> (%) | Entry <sup>a</sup> | Catalyst | Base                           | Solvent | Yield <sup>b</sup> (%) |
|--------------------|----------|---------------------------------|---------|------------------------|--------------------|----------|--------------------------------|---------|------------------------|
| 1                  | S1a      | K <sub>2</sub> CO <sub>3</sub>  | DMSO    | 80                     | 10                 | S1b      | K <sub>2</sub> CO <sub>3</sub> | DMF     | -                      |
| 2                  | S1a      | K <sub>2</sub> CO <sub>3</sub>  | Toluene | -                      | 11                 | S1c      | K <sub>2</sub> CO <sub>3</sub> | DMF     | 32                     |
| 3                  | S1a      | K <sub>2</sub> CO <sub>3</sub>  | MeCN    | 27                     | 12                 | S1d      | K <sub>2</sub> CO <sub>3</sub> | DMF     | 37                     |
| 4                  | S1a      | K <sub>2</sub> CO <sub>3</sub>  | DMF     | 93                     | 13                 | S1e      | K <sub>2</sub> CO <sub>3</sub> | DMF     | 24                     |
| 5                  | S1a      | Na <sub>2</sub> CO <sub>3</sub> | DMF     | 47                     | 14                 | S1f      | K <sub>2</sub> CO <sub>3</sub> | DMF     | 39                     |
| 6                  | S1a      | Cs <sub>2</sub> CO <sub>3</sub> | DMF     | 79                     | 15                 | S1g      | K <sub>2</sub> CO <sub>3</sub> | DMF     | 31                     |
| 7                  | S1a      | KOH                             | DMF     | 69                     | 16 <sup>c</sup>    | S1a      | K <sub>2</sub> CO <sub>3</sub> | DMF     | 59                     |
| 8                  | S1a      | NaOH                            | DMF     | 58                     | 17 <sup>d</sup>    | S1a      | K <sub>2</sub> CO <sub>3</sub> | DMF     | 94                     |
| 9                  | S1a      | -                               | DMF     | -                      | 18 <sup>e</sup>    | S1a      | K <sub>2</sub> CO <sub>3</sub> | DMF     | 91                     |

<sup>a</sup> Reaction Condition: pyrazole (1 mmol), 1,4-dinitrobenzene (1.2 mmol), imidazole (1.0 mmol), base (1.6 mmol), 0.002 g catalyst, solvent (2 mL) at 90 °C upto 2 h. <sup>b</sup> Isolated yield. <sup>c</sup> at 60 °C. <sup>d</sup> at 120 °C. <sup>e</sup> fifth cycle of the recovered catalyst (entry 4). DMF = dimethyl formamide, DMSO = dimethyl sulfoxide.

**Table S2** Control experiment of *m*-bromonitrobenzene with imidazole to demonstrate the thermally induced chemoselectivity

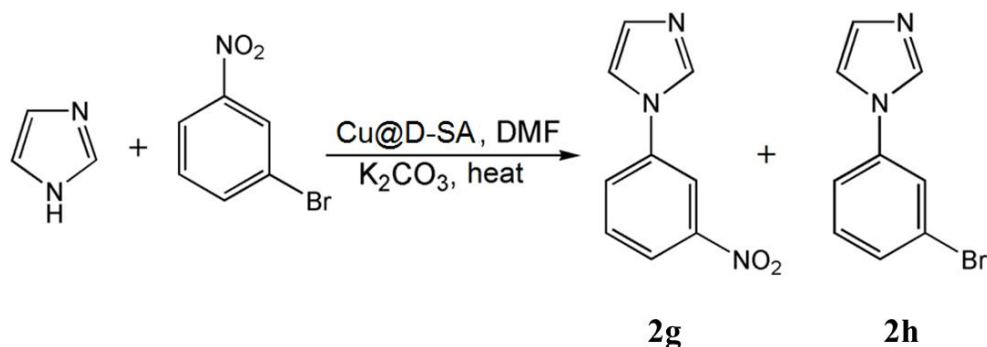

| Entry <sup>a</sup> | Temperature (°C) | Conversion <sup>b</sup> | Selectivity |
|--------------------|------------------|-------------------------|-------------|
|                    |                  |                         | 2g : 2h     |
| 1                  | 70               | 67%                     | 94 : 6      |
| 2                  | 90               | 78%                     | 79 : 21     |
| 3                  | 110              | 85%                     | 56 : 44     |
| 4                  | 130              | 86%                     | 27 : 73     |
| 5                  | 150              | 89%                     | 9 : 91      |

<sup>a</sup> Reaction condition: *m*-bromonitrobenzene (1.2 mmol), imidazole (1.0 mmol), K<sub>2</sub>CO<sub>3</sub> (1.6 mmol), Cu@D-SA (0.002 g), DMF (2 mL) at heating for 2 h. <sup>b</sup> Isolated yield. Reactions have been performed both in inert and open atmosphere, however, no variation of selectivity of products was observed in low and high temperatures.

**Table S3** TOF values in each recycled catalytic step using 1,4-dinitrobenzene and pyrazole as reactants under the optimized reaction conditions

| Cycle <sup>a</sup> | Isolated yield <sup>b</sup> | TOF (min <sup>-1</sup> ) <sup>c</sup> |
|--------------------|-----------------------------|---------------------------------------|
| 1                  | 93                          | 315                                   |
| 2                  | 93                          | 315                                   |
| 3                  | 92                          | 312                                   |
| 4                  | 91                          | 308                                   |
| 5                  | 91                          | 308                                   |
| 6                  | 90                          | 305                                   |

|    |    |     |
|----|----|-----|
| 7  | 90 | 305 |
| 8  | 90 | 305 |
| 9  | 89 | 298 |
| 10 | 88 | 298 |

<sup>a</sup> Reaction Condition: pyrazole (1 mmol), 1,4-dinitrobenzene (1.2 mmol), K<sub>2</sub>CO<sub>3</sub> (1.6 mmol), 0.002 g catalyst, DMF (2 mL) at 90 °C upto 2 h. <sup>b</sup> Isolated yield. <sup>c</sup> TOF = Mol.product/mol.Cu min. (unit in min<sup>-1</sup>).

### Characterization of Products

pyrazole-*p*-nitrobenzene (Table 1, entry 1a): <sup>1</sup>H-NMR (300 MHz, CDCl<sub>3</sub>): δ (ppm): 8.34 (d, *J* = 8.98 Hz, 2H), 8.04 (d, *J* = 2.25 Hz, 1H), 7.89 (d, *J* = 8.98 Hz, 2H), 7.8 (s, 1H), 6.56 (s, 1H); <sup>13</sup>C-NMR (75 MHz, CDCl<sub>3</sub>): δ (ppm): 145.47, 144.42, 142.78, 127.06, 125.38, 118.62, 109.35; HRMS (ESI): calcd. for [M+H]<sup>+</sup> (C<sub>9</sub>H<sub>8</sub>N<sub>3</sub>O<sub>2</sub>) requires *m/z* 190.0617, found 190.06613; Anal. Calcd. for C<sub>9</sub>H<sub>7</sub>N<sub>3</sub>O<sub>2</sub>: C, 57.14%; H, 3.73%; N, 22.21%. Found: C, 57.17%; H, 3.74%; N, 22.19%.

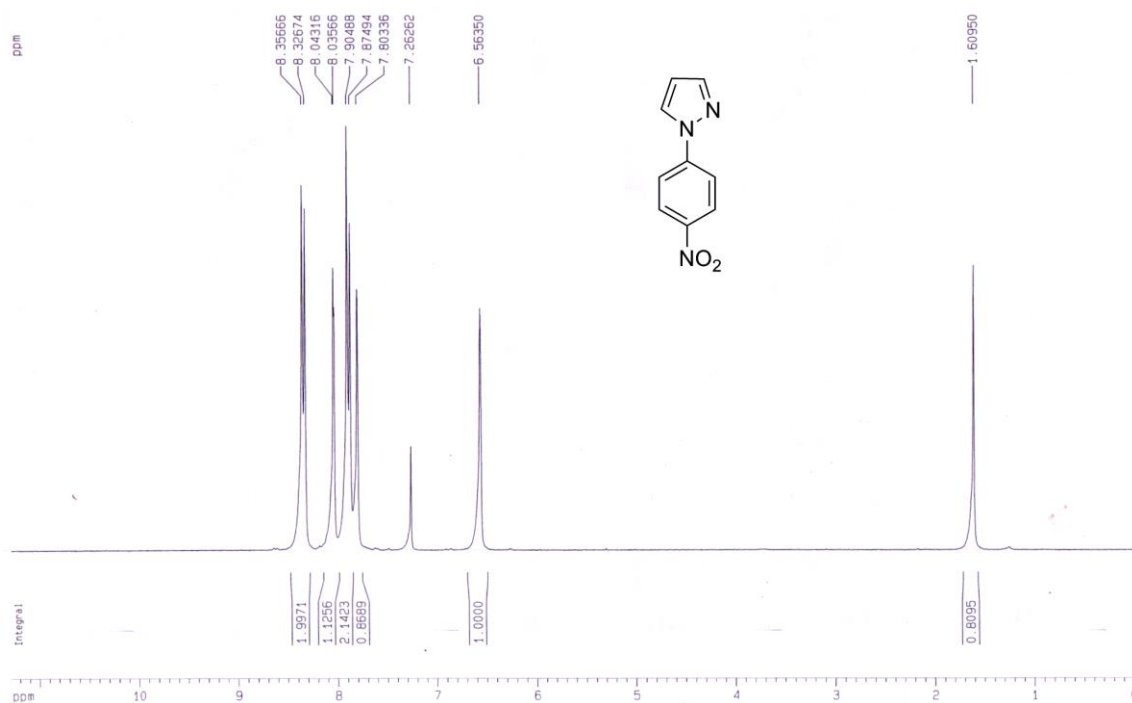

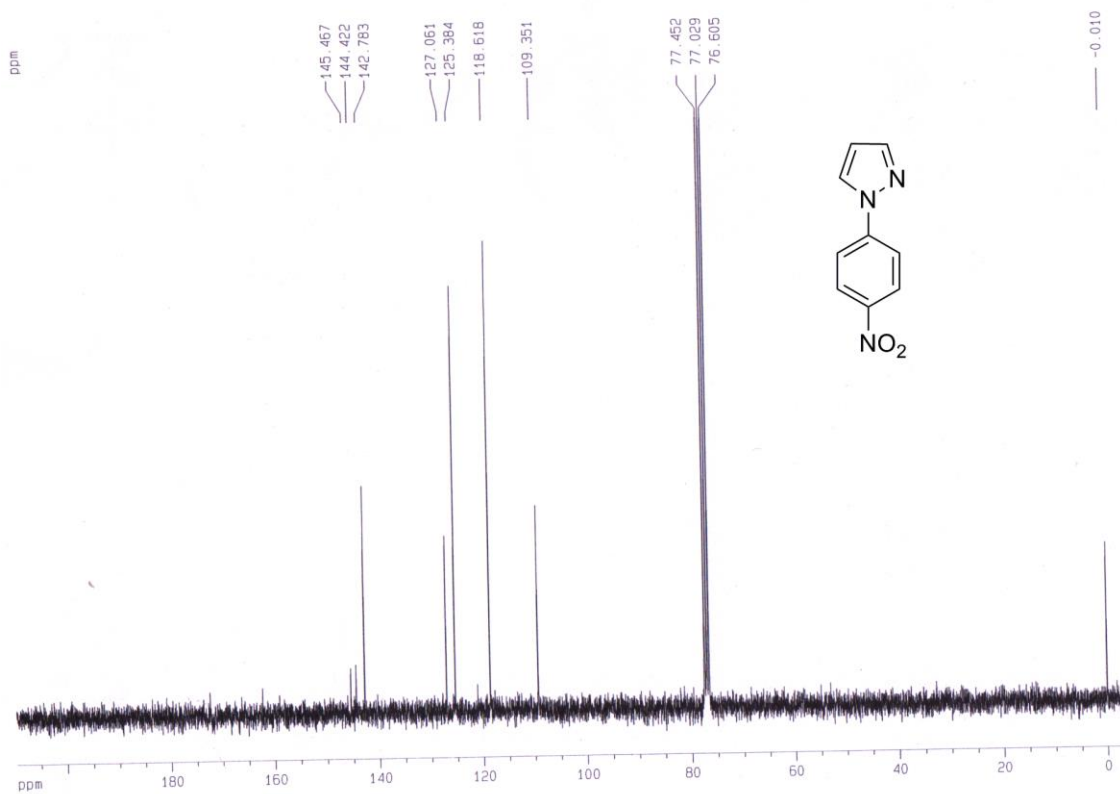

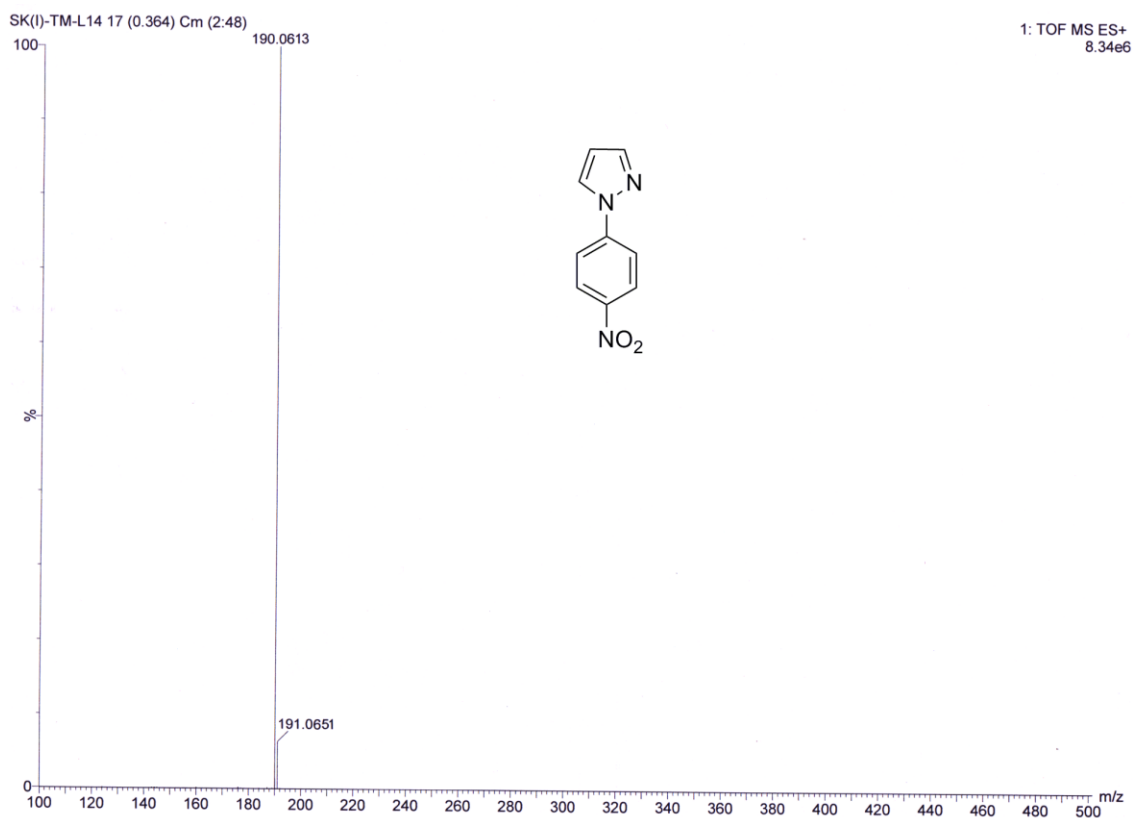

pyrazole-*o*-nitrobenzene (Table 1, entry 1b):  $^1\text{H-NMR}$  (300 MHz,  $\text{CDCl}_3$ ):  $\delta$  (ppm): 7.87-7.84 (m, 1H), 7.73-7.64 (m, 3H), 7.58-7.48 (m, 2H), 6.49-6.48 (m, 1H);  $^{13}\text{C-NMR}$  (75 MHz,  $\text{CDCl}_3$ ):  $\delta$  (ppm): 144.61, 142.28, 133.38, 133.09, 129.77, 128.41, 126.18, 125.01, 108.2; HRMS (ESI): calcd. for  $[\text{M}+\text{H}]^+$  ( $\text{C}_{13}\text{H}_{10}\text{N}_3\text{O}_2$ ) requires  $m/z$  240.0773, found 240.0774; Anal. Calcd. for  $\text{C}_{13}\text{H}_9\text{N}_3\text{O}_2$ : C, 65.27%; H, 3.79%; N, 17.56%. Found: C, 65.26%; H, 3.80%; N, 17.55%.

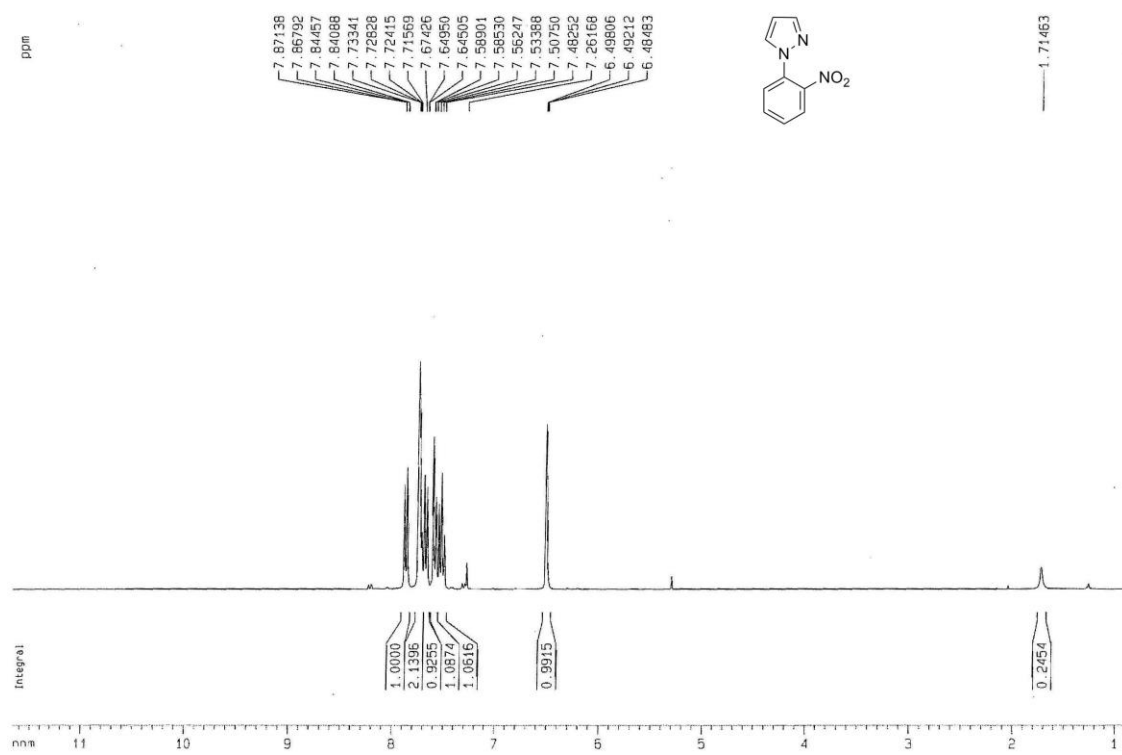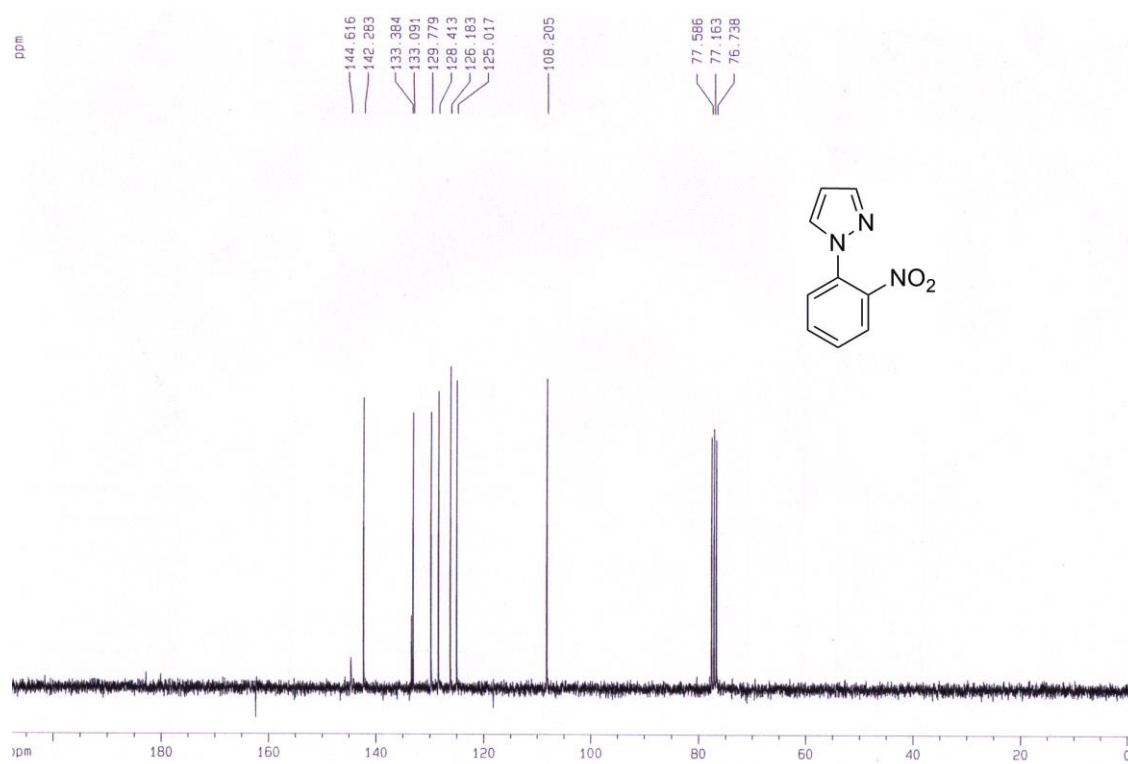



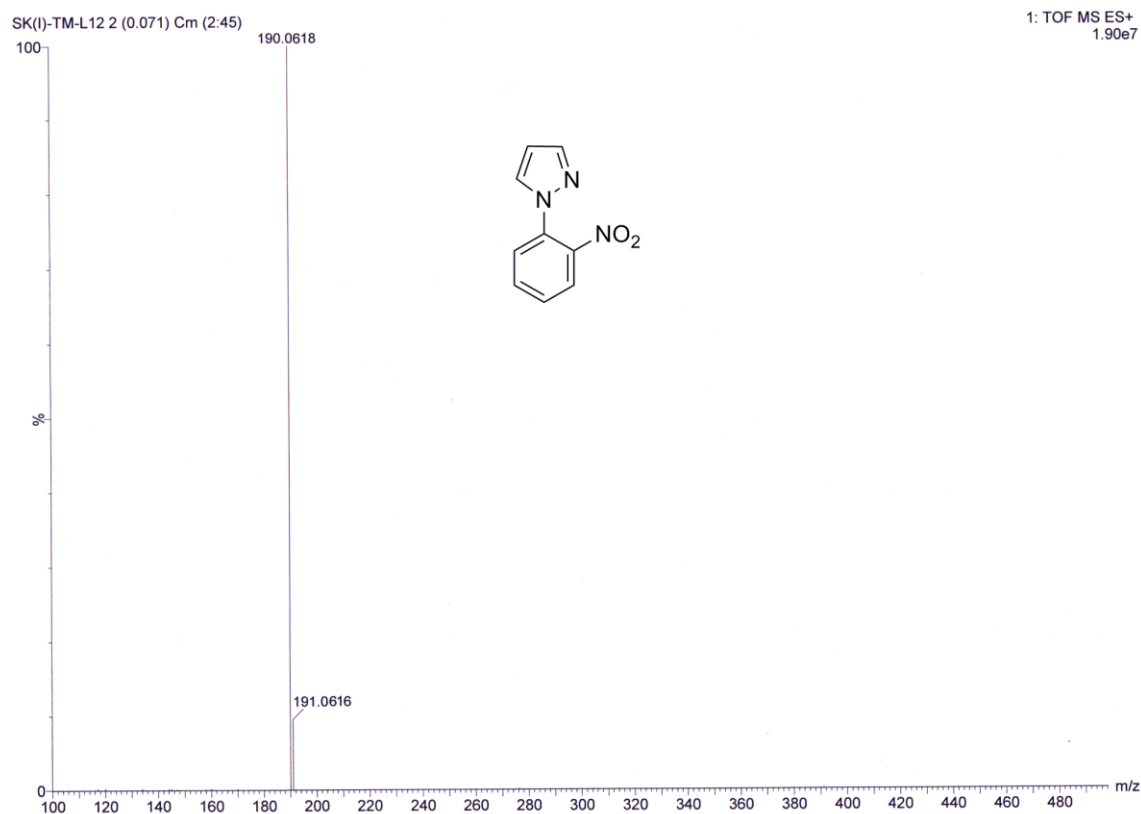

pyrazole-*p*-benzonitrile (Table 1, entry 1c):  $^1\text{H-NMR}$  (300 MHz,  $\text{CDCl}_3$ ):  $\delta$  (ppm): 7.97 (d,  $J = 2.52$  Hz, 1H), 7.8 (d,  $J = 8.82$  Hz, 2H), 7.74-7.67 (m, 3H), 6.49 (t,  $J = 1.8$  Hz, 1H);  $^{13}\text{C NMR}$  (75 MHz,  $\text{CDCl}_3$ ):  $\delta$  (ppm): 142.94, 142.4, 133.62, 126.88, 118.9, 118.41, 109.48, 109.05; HRMS (ESI): calcd. for  $[\text{M}+\text{H}]^+$  ( $\text{C}_{10}\text{H}_8\text{N}_3$ ) requires  $m/z$  170.0718, found 170.0717; Anal. Calcd. for  $\text{C}_{10}\text{H}_7\text{N}_3$ : C, 70.99%; H, 4.17%; N, 24.84%. Found: C, 70.97%; H, 4.15%; N, 24.82%.

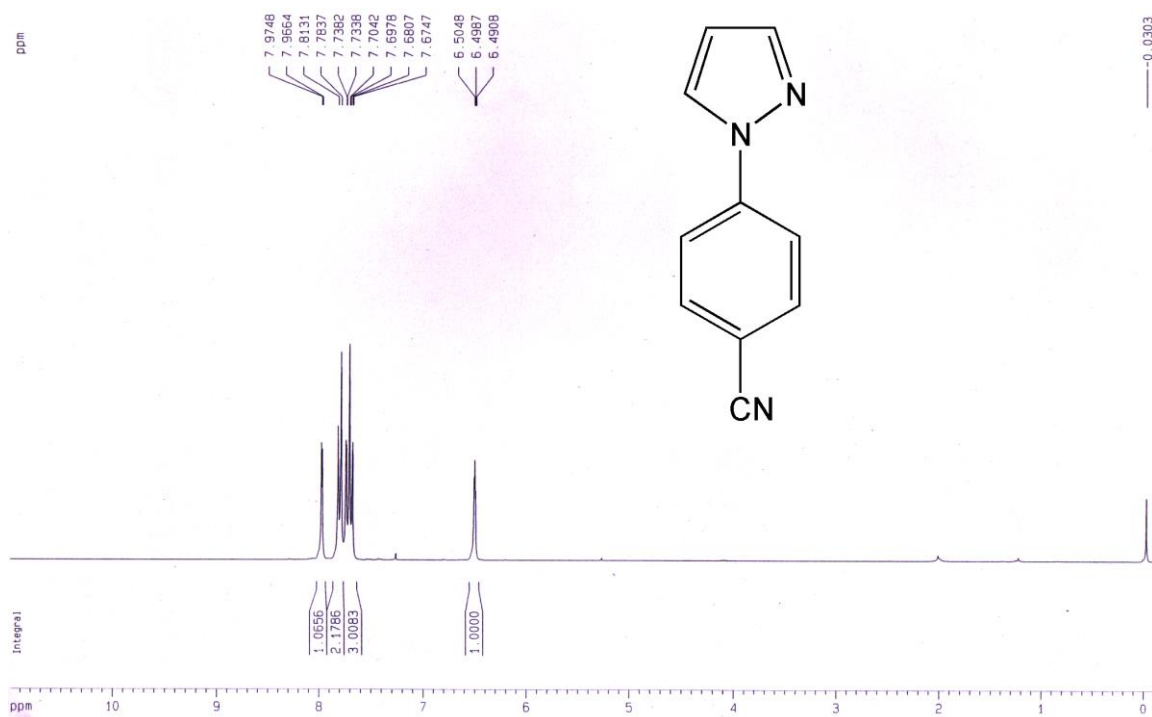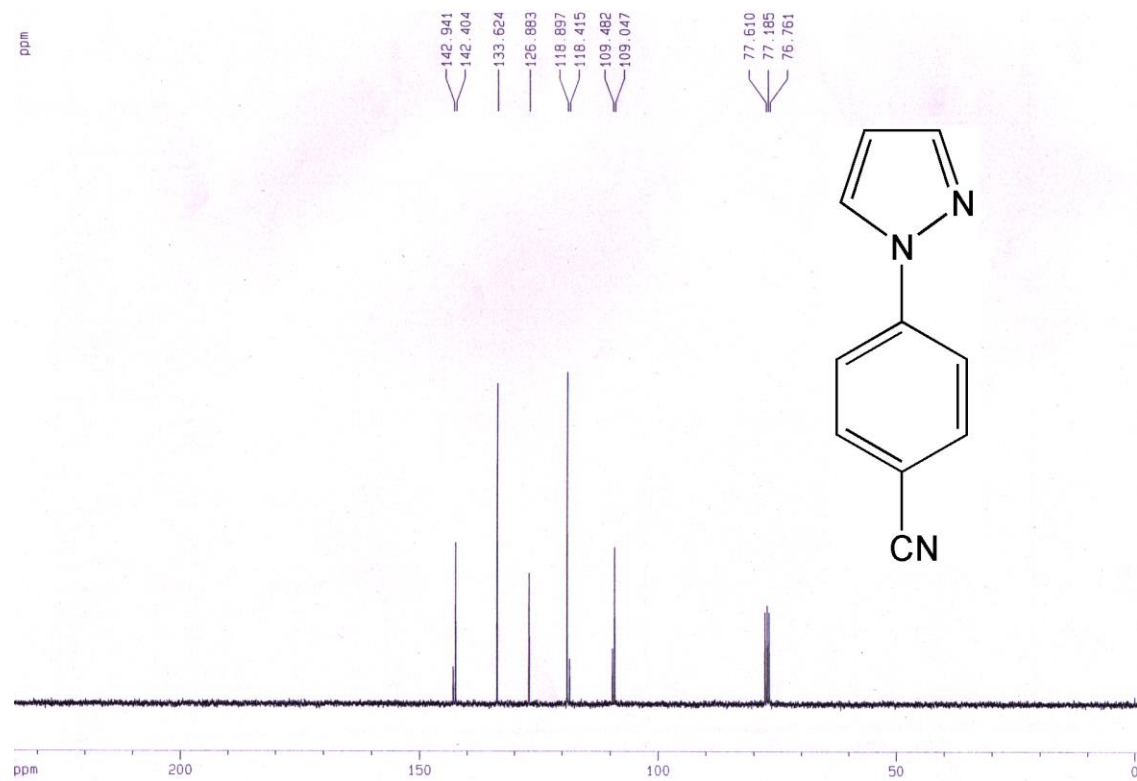

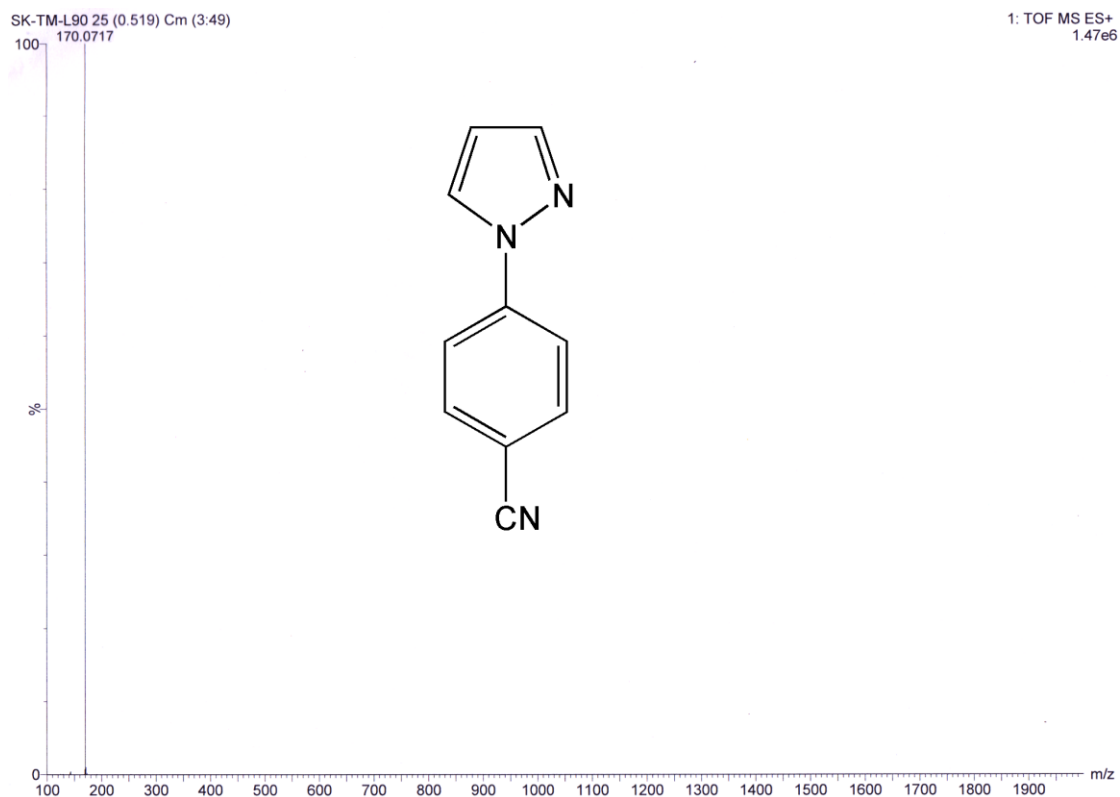

1-Phenyl-1H-pyrazole (Table 1, entry 1d):  $^1\text{H-NMR}$  (300 MHz,  $\text{CDCl}_3$ ):  $\delta$  (ppm): 7.86-7.84 (m, 1H), 7.70-7.62 (m, 3H), 7.41-7.30 (m, 3H), 6.40-6.39 (m, 1H); HRMS (ESI): calcd. for  $[\text{M}+\text{H}]^+$  ( $\text{C}_9\text{H}_9\text{N}_2$ ) requires  $m/z$  145.0687, found 245.0591; Anal. Calcd. for  $\text{C}_9\text{H}_8\text{N}_2$ : C, 74.98%; H, 5.59%; N, 19.43%. Found: C, 74.91%; H, 5.63%; N, 19.50%.

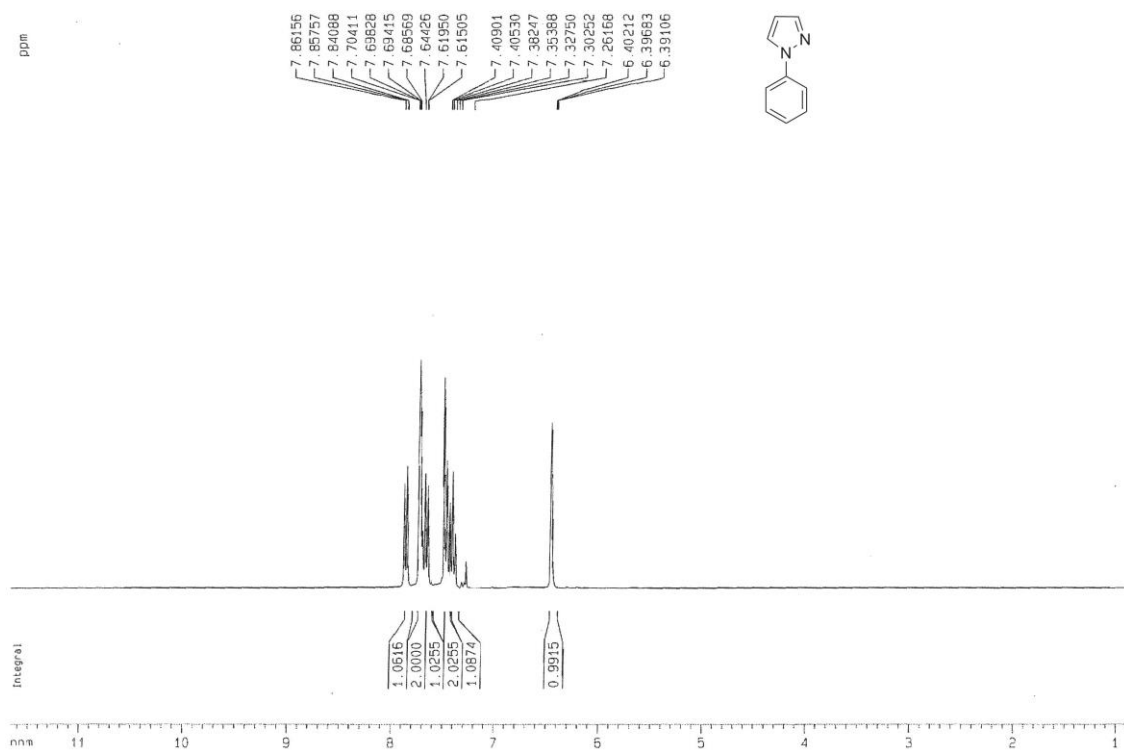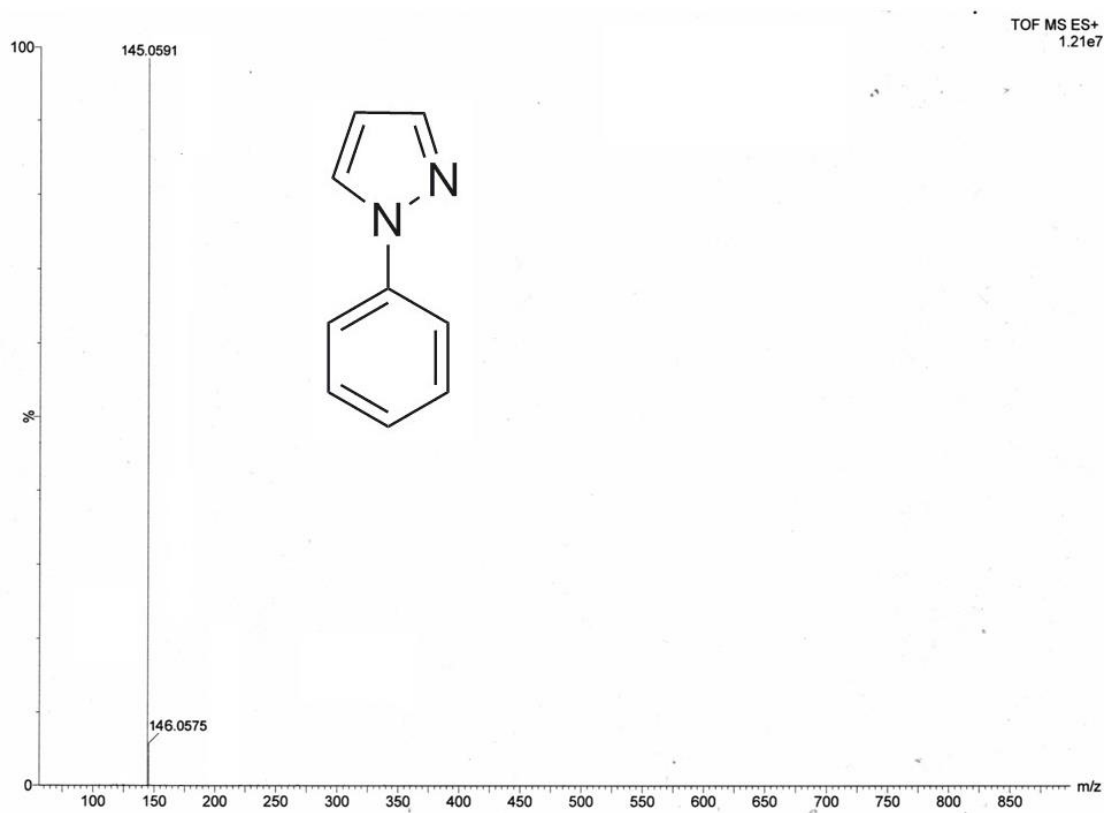

1-(4-Methylphenyl)-1H-pyrazole (Table 1, entry 1e):  $^1\text{H-NMR}$  (300 MHz,  $\text{CDCl}_3$ ):  $\delta$  (ppm): 7.89-7.59 (m, 6H), 6.48 (d,  $J = 1.83$  Hz, 1H), 2.38 (s, 3H);  $^{13}\text{C NMR}$  (75 MHz,  $\text{CDCl}_3$ ):  $\delta$  (ppm): 140.70, 138.25, 136.04, 130.52, 126.82, 120.20, 107.15, 20.05; HRMS (ESI): calcd. for  $[\text{M}+\text{H}]^+$  ( $\text{C}_{10}\text{H}_{11}\text{N}_2$ ) requires  $m/z$  159.0844, found 159.0566; Anal. Calcd. for  $\text{C}_{10}\text{H}_{10}\text{N}_2$ : C, 75.92%; H, 6.37%; N, 17.71%. Found: C, 75.95%; H, 6.39%; N, 17.82%.

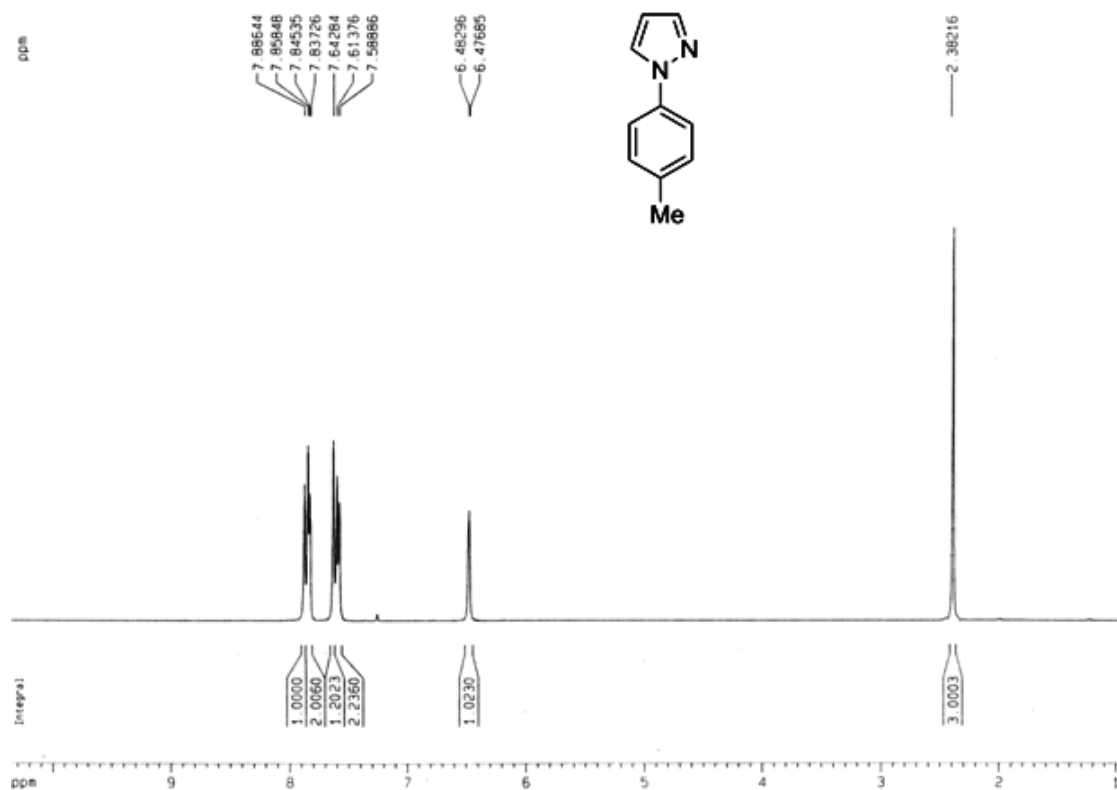

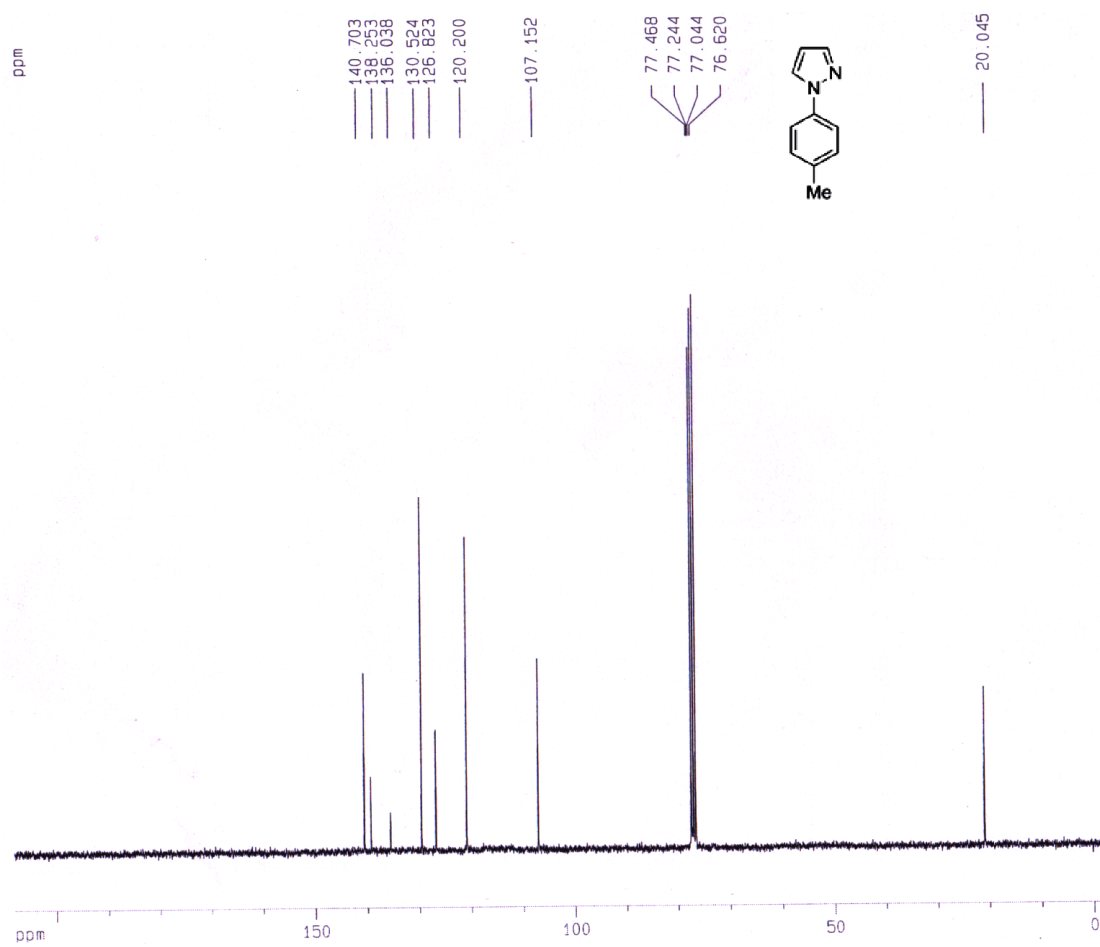

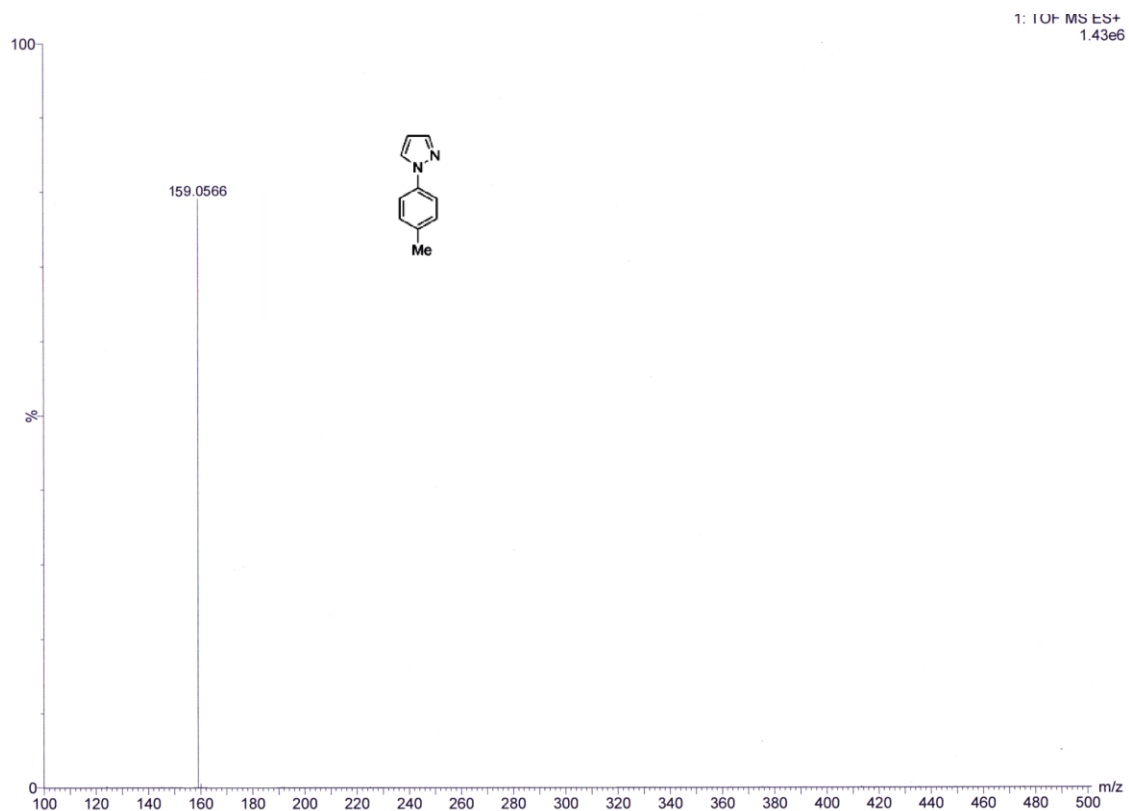

1-(4-Methoxyphenyl)-1H-pyrazole (Table 1, entry 1f):  $^1\text{H-NMR}$  (300 MHz,  $\text{CDCl}_3$ ):  $\delta$  (ppm): 7.83 (d,  $J = 0.6$  Hz, 1H), 7.69 (s, 1H), 7.60-7.57 (m, 2H), 6.99-6.96 (m, 2H), 6.44 (s, 1H), 3.85 (s, 3H);  $^{13}\text{C NMR}$  (75 MHz,  $\text{CDCl}_3$ ):  $\delta$  (ppm): 158.25, 140.60, 134.04, 126.82, 120.92, 114.52, 107.15, 55.57; HRMS (ESI): calcd. for  $[\text{M}+\text{H}]^+$  ( $\text{C}_{10}\text{H}_{11}\text{N}_2\text{O}$ ) requires  $m/z$  175.0793, found 175.0871; Anal. Calcd. for  $\text{C}_{10}\text{H}_{10}\text{N}_2\text{O}$ : C, 68.95%; H, 5.79%; N, 16.08%. Found: C, 69.03%; H, 5.81%; N, 16.12%.

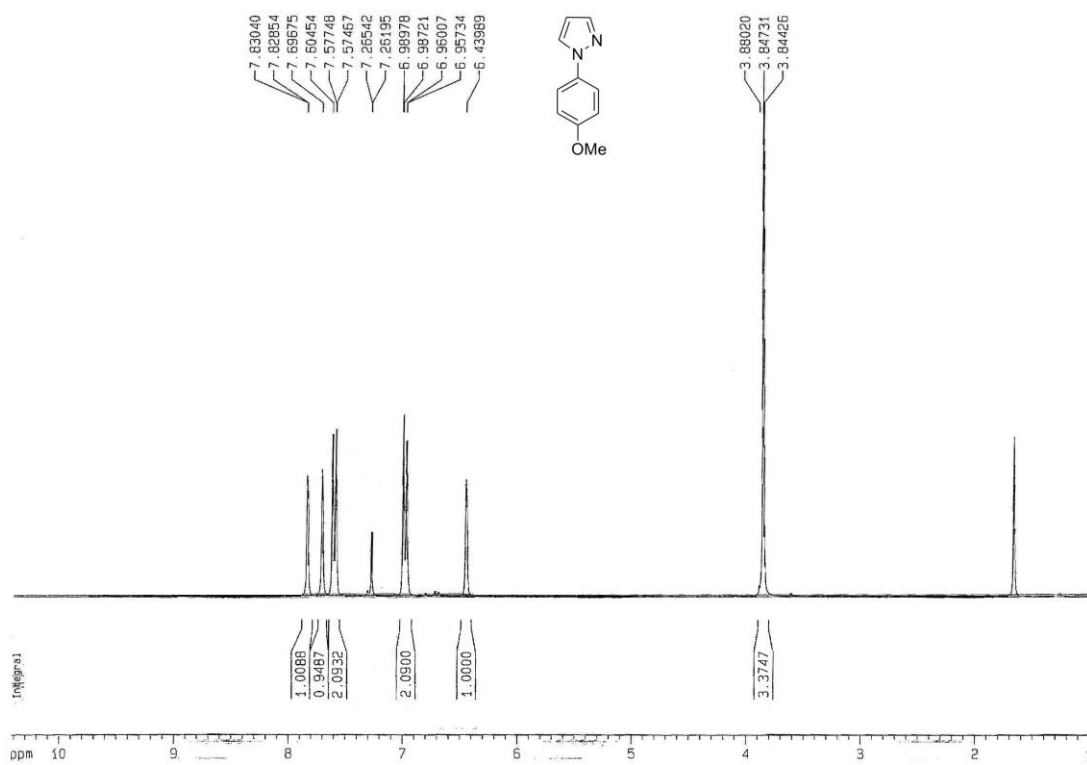



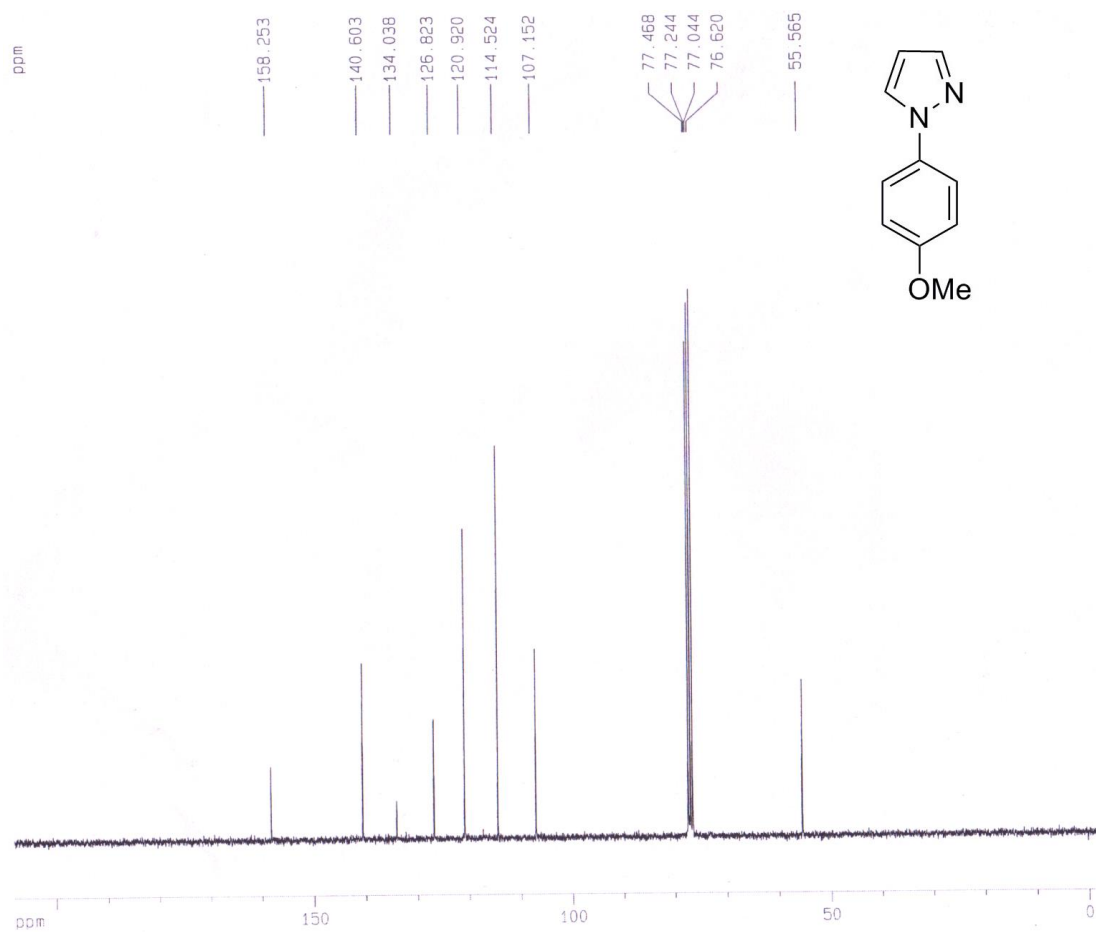

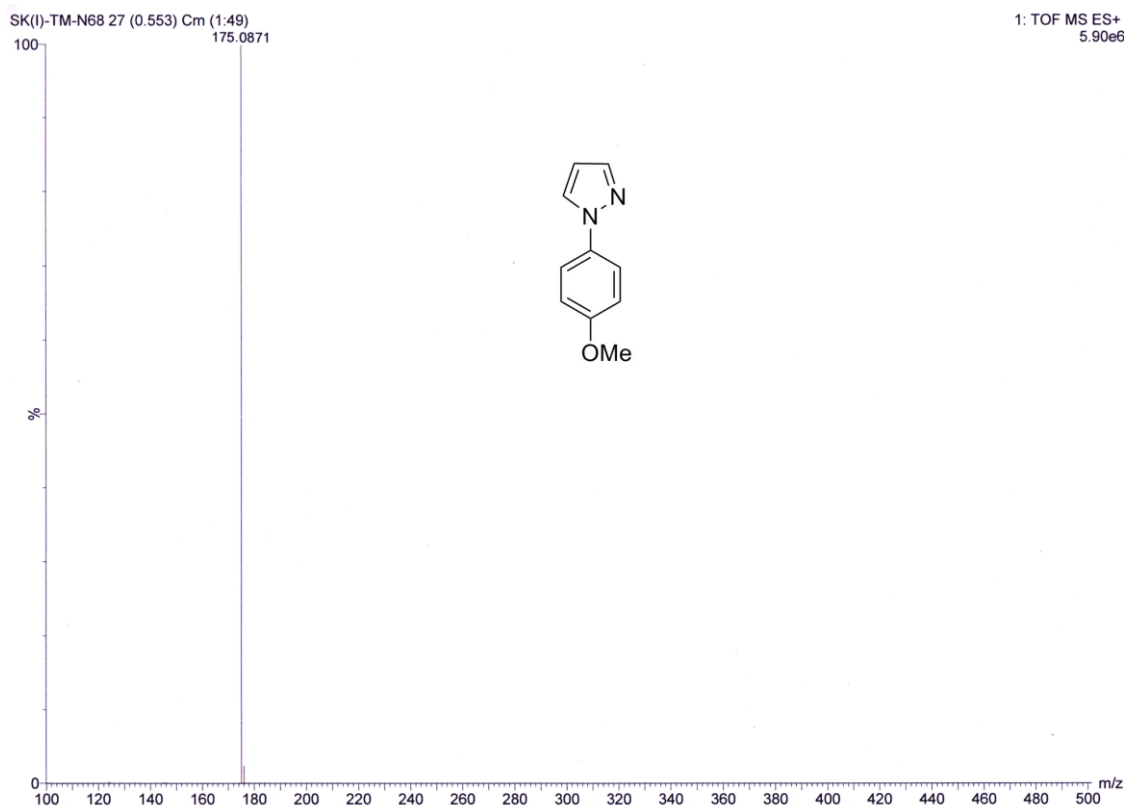

pyrazole-*p*-acetylbenzene (Table 1, 1g):  $\delta$  (ppm): 8.03-7.98 (m, 3H), 7.78-7.73 (m, 3H), 6.48 (d,  $J = 1.83$  Hz, 1H);  $^{13}\text{C}$ -NMR (75 MHz,  $\text{CDCl}_3$ ):  $\delta$  (ppm): 196.76, 143.29, 142.01, 134.77, 129.96, 126.87, 118.34, 108.55, 26.53; HRMS (ESI): calcd. for  $[\text{M}+\text{H}]^+$  ( $\text{C}_{11}\text{H}_{11}\text{N}_2\text{O}$ ) requires  $m/z$  187.0793, found 187.0739; Anal. Calcd. for  $\text{C}_{11}\text{H}_{10}\text{N}_2\text{O}$ : C, 70.95%; H, 5.41%; N, 15.04%. Found: C, 70.96%; H, 5.40%; N, 15.05%.

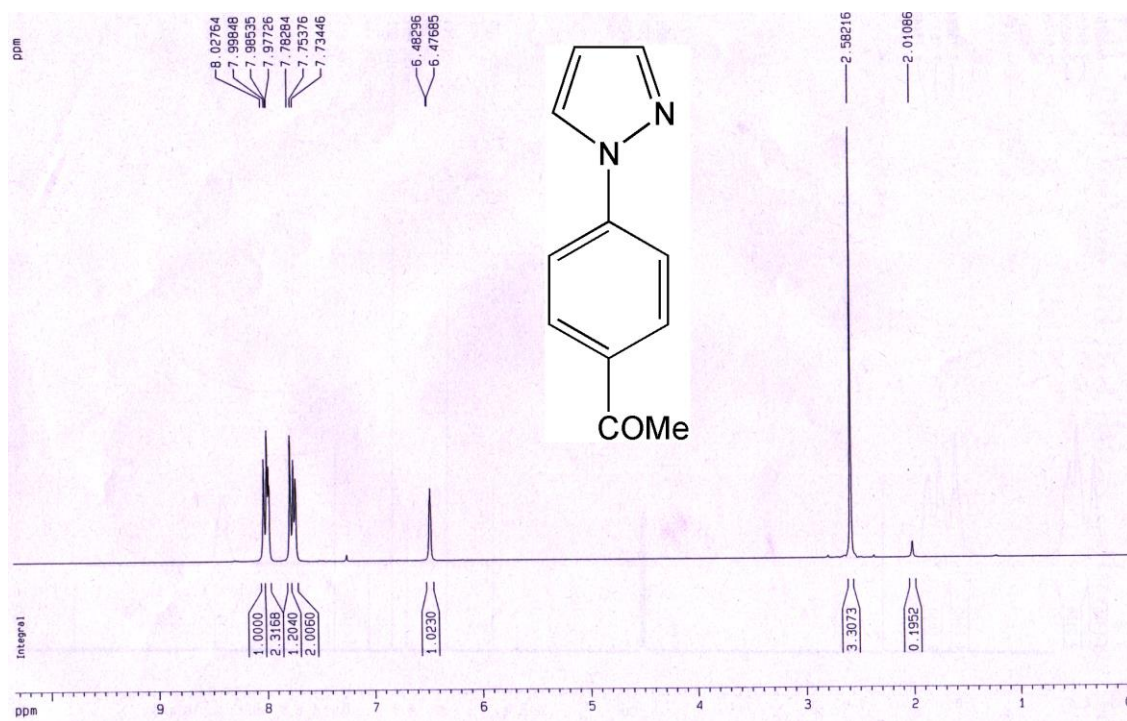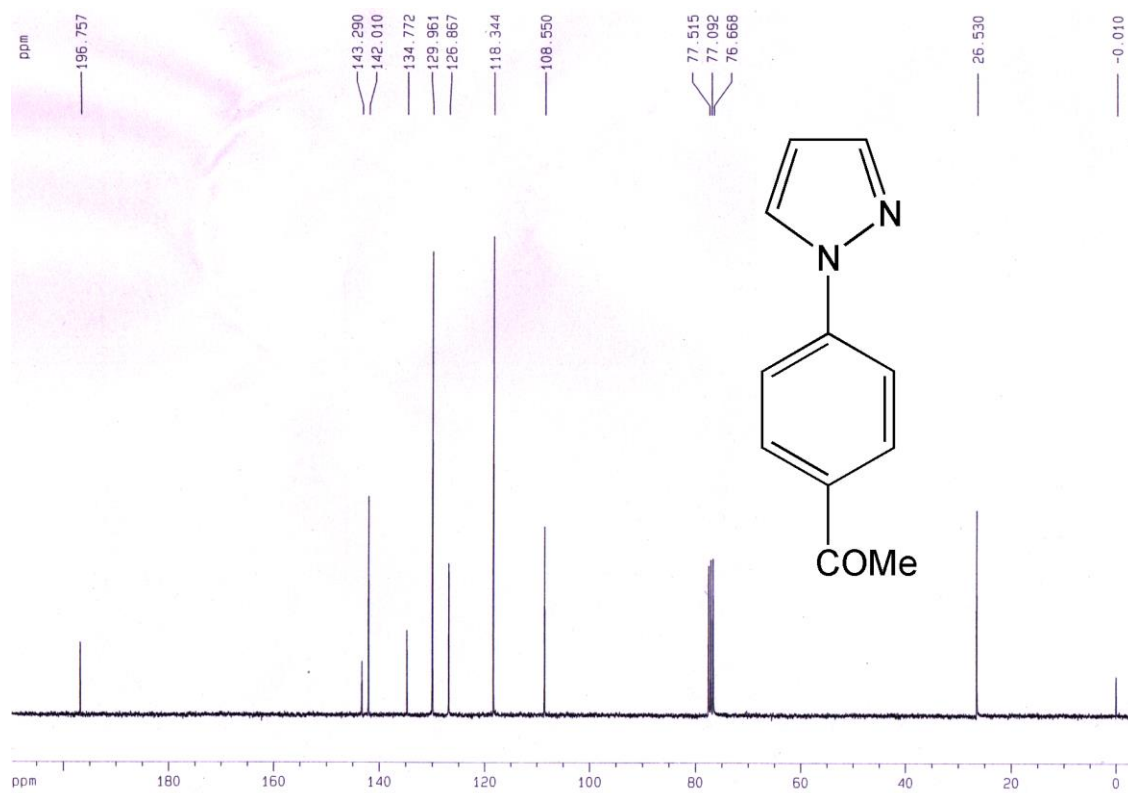

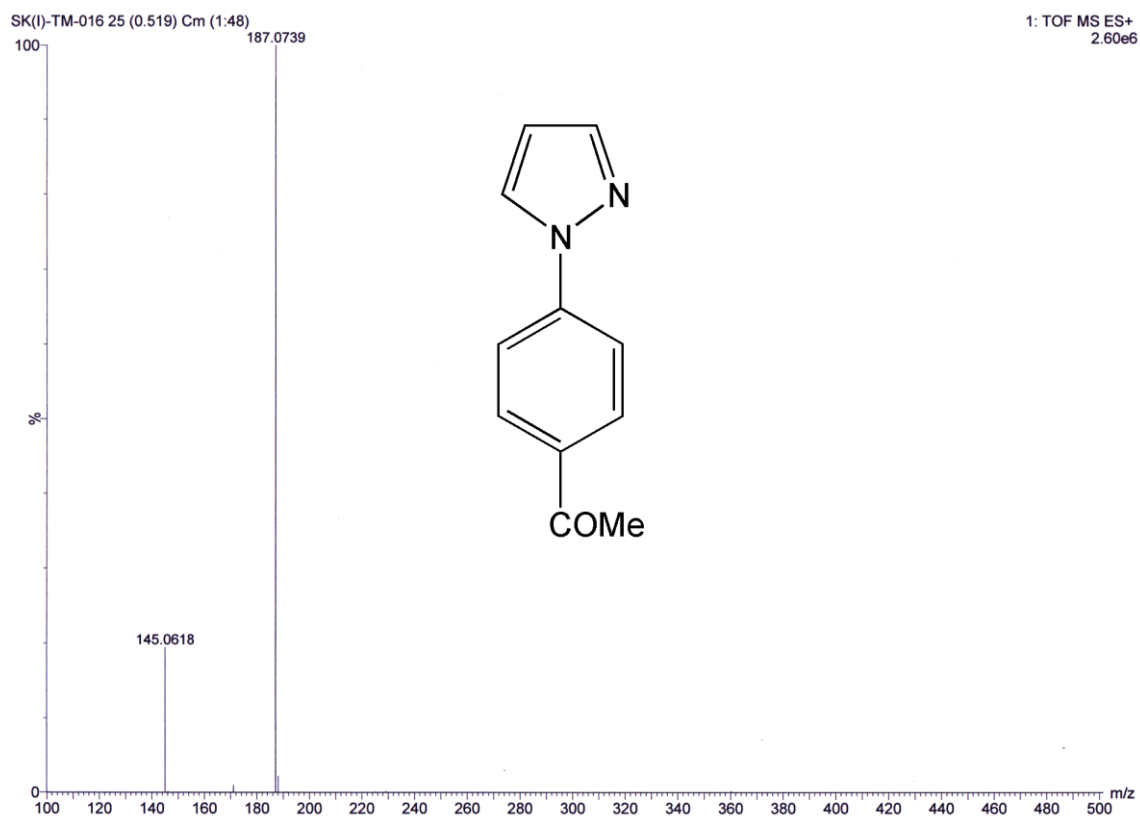

pyrazole-*p*-fluorobenzene (Table 1, 1h):  $^1\text{H-NMR}$  (300 MHz,  $\text{CDCl}_3$ ):  $\delta$  (ppm): 7.83 (d,  $J = 0.6$  Hz, 1H), 7.69 (s, 1H), 7.60-7.57 (m, 2H), 7.19-7.16 (m, 2H), 6.44 (s, 1H);  $^{13}\text{C-NMR}$  (75 MHz,  $\text{CDCl}_3$ ):  $\delta$  (ppm): 158.25, 140.60, 134.04, 126.82, 120.92, 114.52, 107.15; HRMS (ESI): calcd. for  $[\text{M}+\text{H}]^+$  ( $\text{C}_9\text{H}_8\text{FN}_2$ ) requires  $m/z$  163.0759, found 187.0551; Anal. Calcd. for  $\text{C}_9\text{H}_7\text{FN}_2$ : C, 66.66%; H, 4.35%; N, 17.27%. Found: C, 66.76%; H, 4.40%; N, 17.29%.

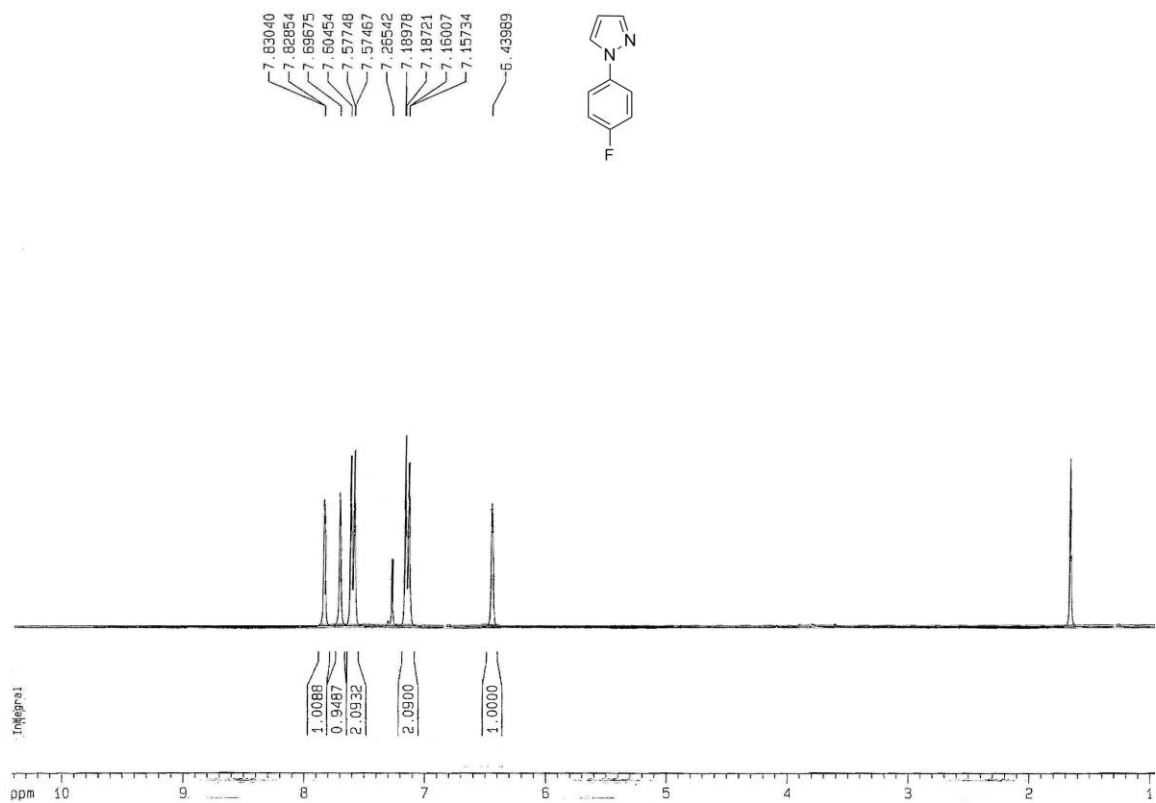

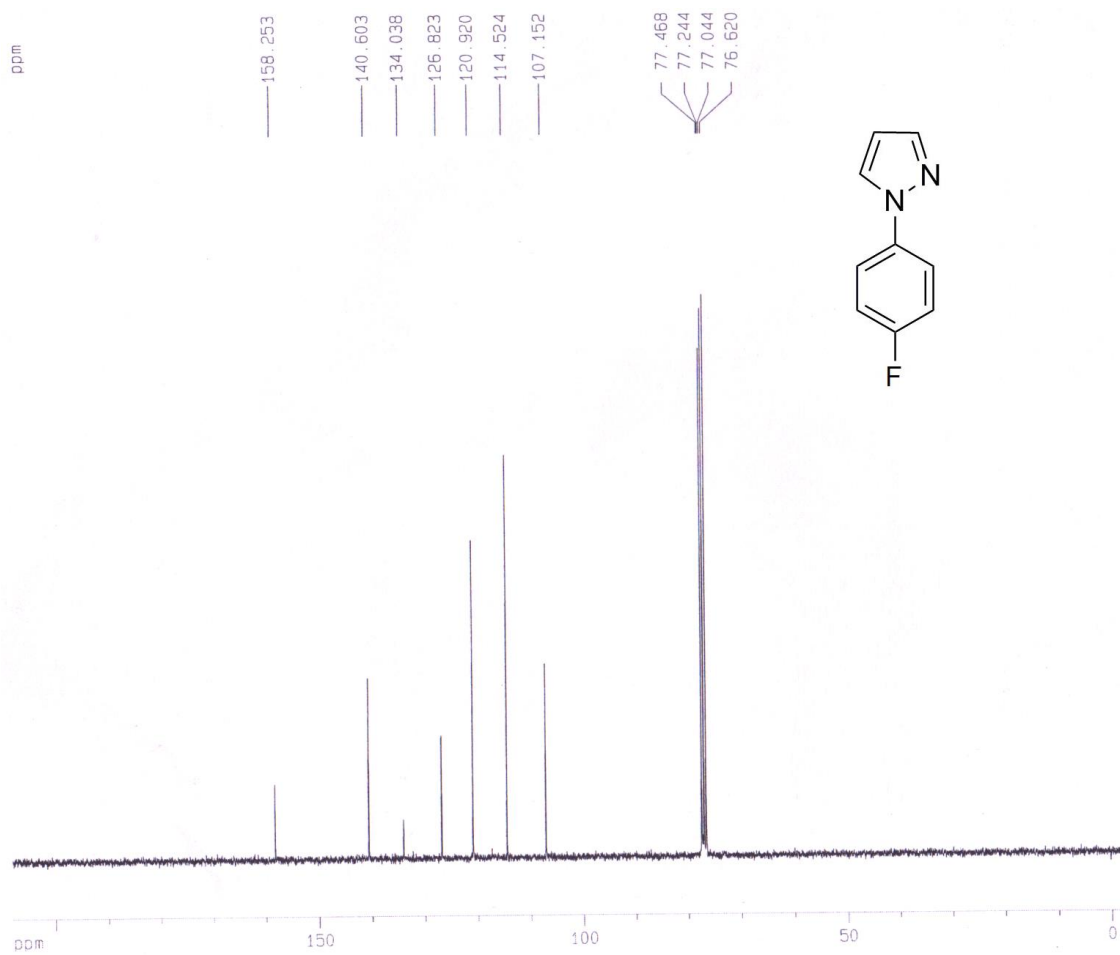

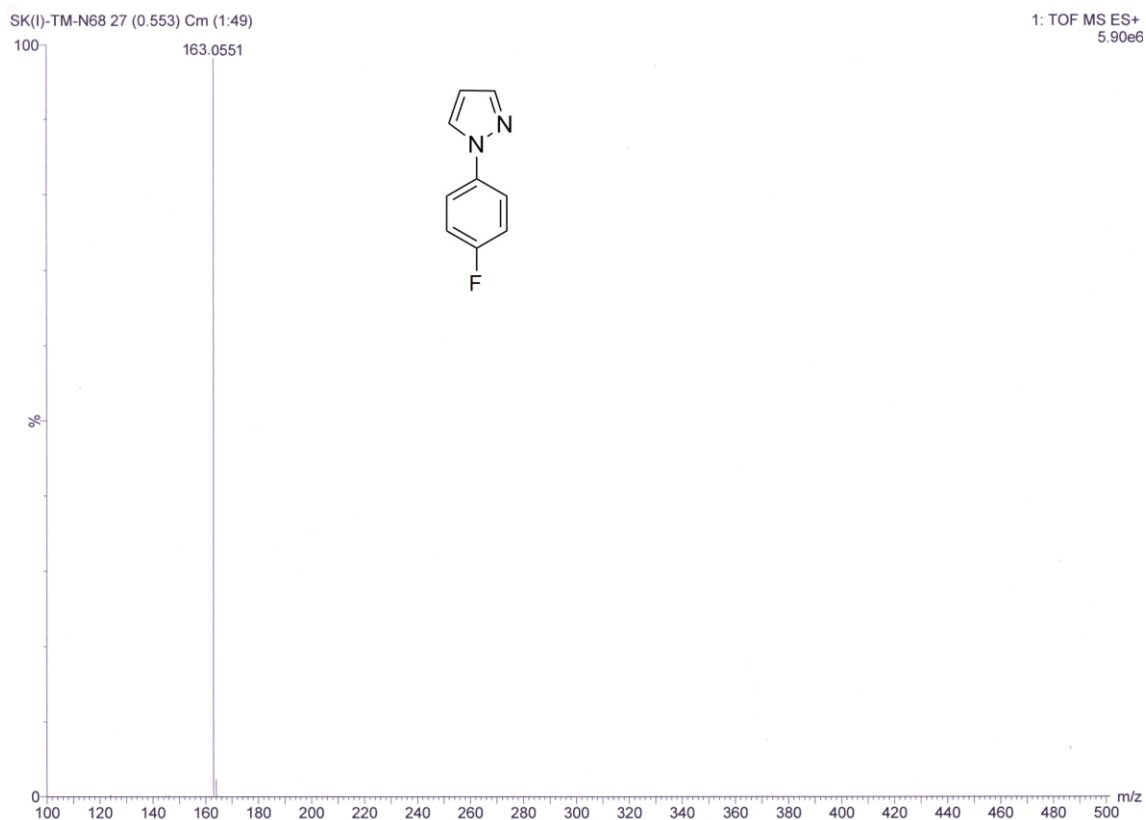

3-phenyl-pyrazole-*p*-nitrobenzene (Table 2, entry 2a):  $^1\text{H-NMR}$  (300 MHz,  $\text{CDCl}_3$ ):  $\delta$  (ppm): 8.36 (t,  $J = 2.03$  Hz, 2H), 8.07 (d,  $J = 2.62$  Hz, 1H), 7.91-7.97 (m, 4H), 7.26-7.49 (m, 3H), 6.87 (d,  $J = 2.60$  Hz, 1H);  $^{13}\text{C NMR}$  (75 MHz,  $\text{CDCl}_3$ ):  $\delta$  (ppm): 154.58, 144.43, 132.23, 128.8, 128.76, 128.25, 126.03, 125.40, 118.30, 106.92; HRMS (ESI): calcd. for  $[\text{M}+\text{H}]^+$  ( $\text{C}_{15}\text{H}_{12}\text{N}_3\text{O}_2$ ) requires  $m/z$  266.0930, found 266.0930; Anal. Calcd. for  $\text{C}_{15}\text{H}_{11}\text{N}_3\text{O}_2$ : C, 67.92%; H, 4.18%; N, 15.84%. Found: C, 67.95%; H, 4.19%; N, 15.82%.

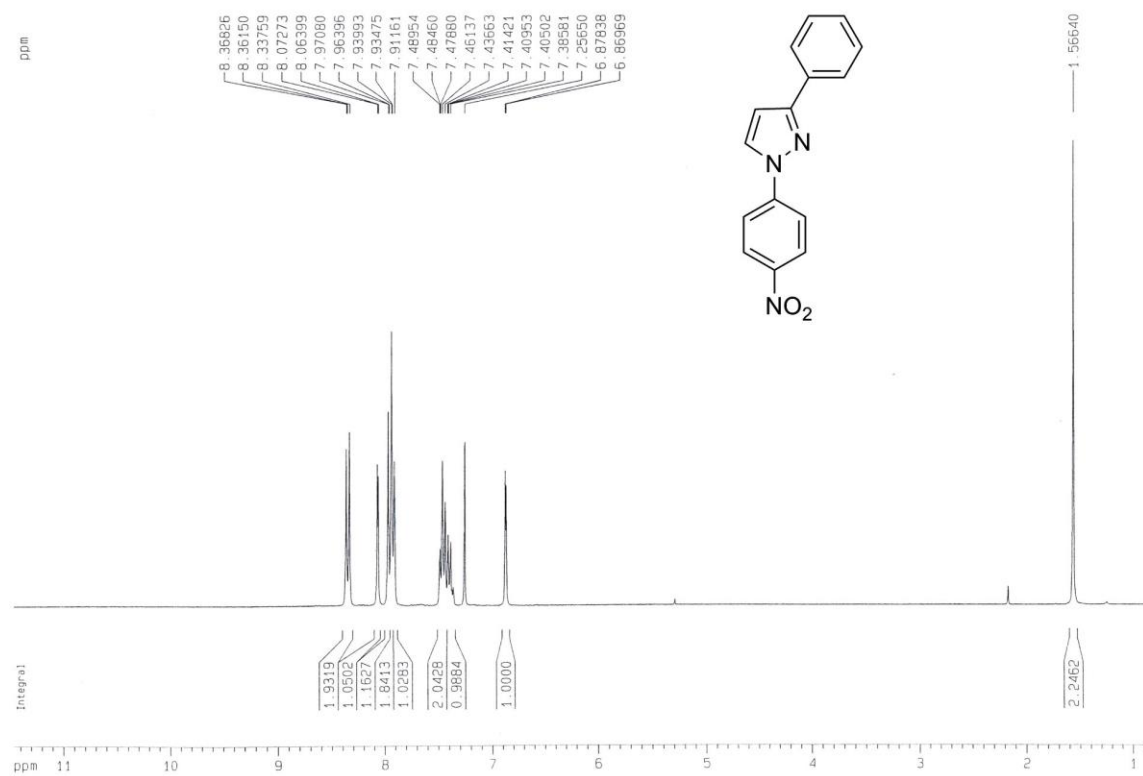



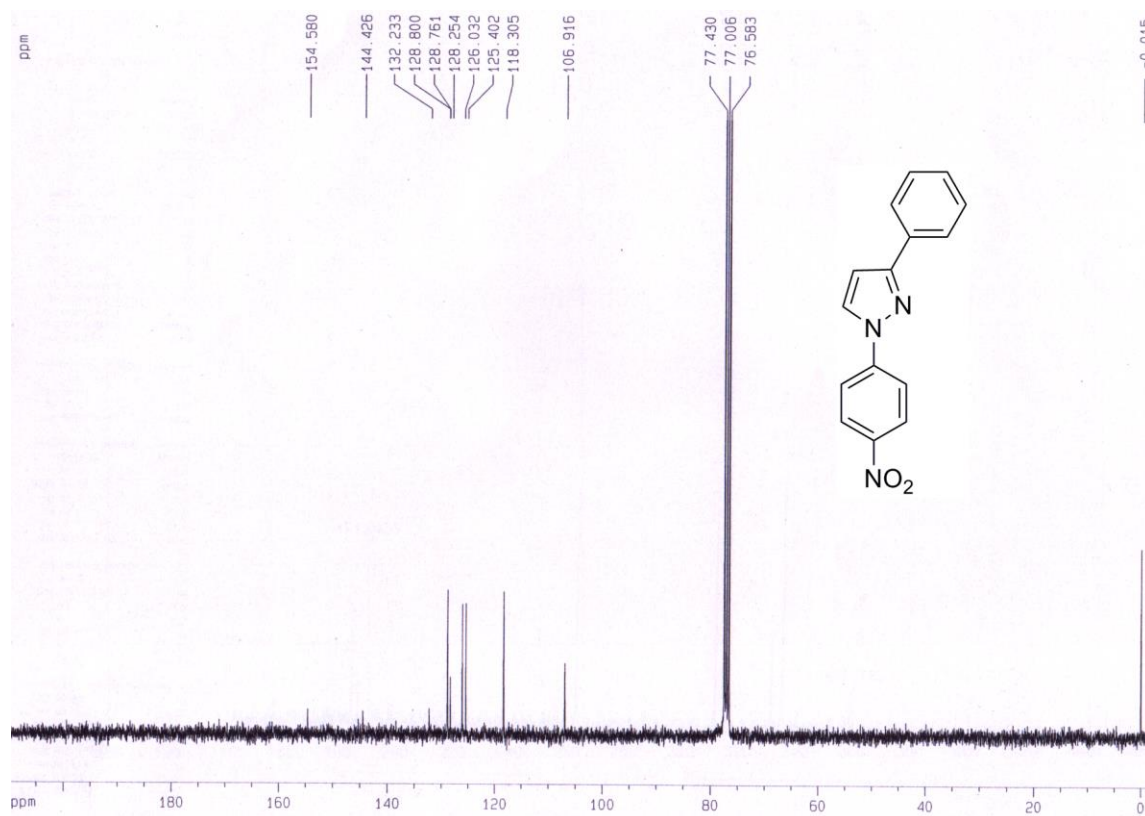

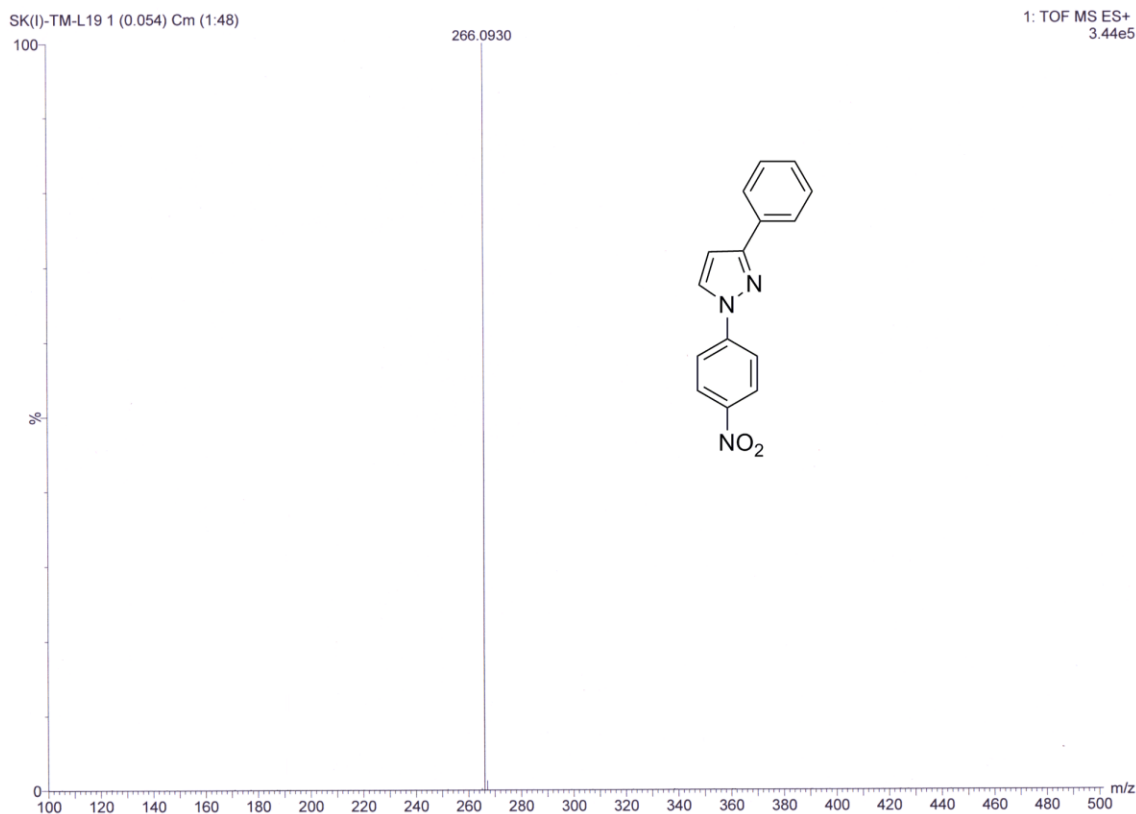

3-methyl-pyrazole-*p*-nitrobenzene (Table 2, entry 2b):  $^1\text{H-NMR}$  (300 MHz,  $\text{CDCl}_3$ ):  $\delta$  (ppm): 8.3 (d,  $J = 9.22$  Hz, 2H), 7.91 (d,  $J = 2.35$  Hz, 1H), 7.81 (d,  $J = 9.21$  Hz, 2H), 6.33 (d,  $J = 2.34$  Hz, 1H), 2.38 (s, 3H);  $^{13}\text{C-NMR}$  (75 MHz,  $\text{CDCl}_3$ ):  $\delta$  (ppm): 152.58, 144.91, 144.42, 127.65, 125.34, 117.92, 109.59, 13.75; HRMS (ESI): calcd. for  $[\text{M}+\text{H}]^+$  ( $\text{C}_{10}\text{H}_{12}\text{N}_3\text{O}_2$ ) requires  $m/z$  204.0773, found 204.0771; Anal. Calcd. for  $\text{C}_{10}\text{H}_{11}\text{N}_3\text{O}_2$ : C, 59.11%; H, 4.46%; N, 20.68%. Found: C, 59.12%; H, 4.44%; N, 20.69%.

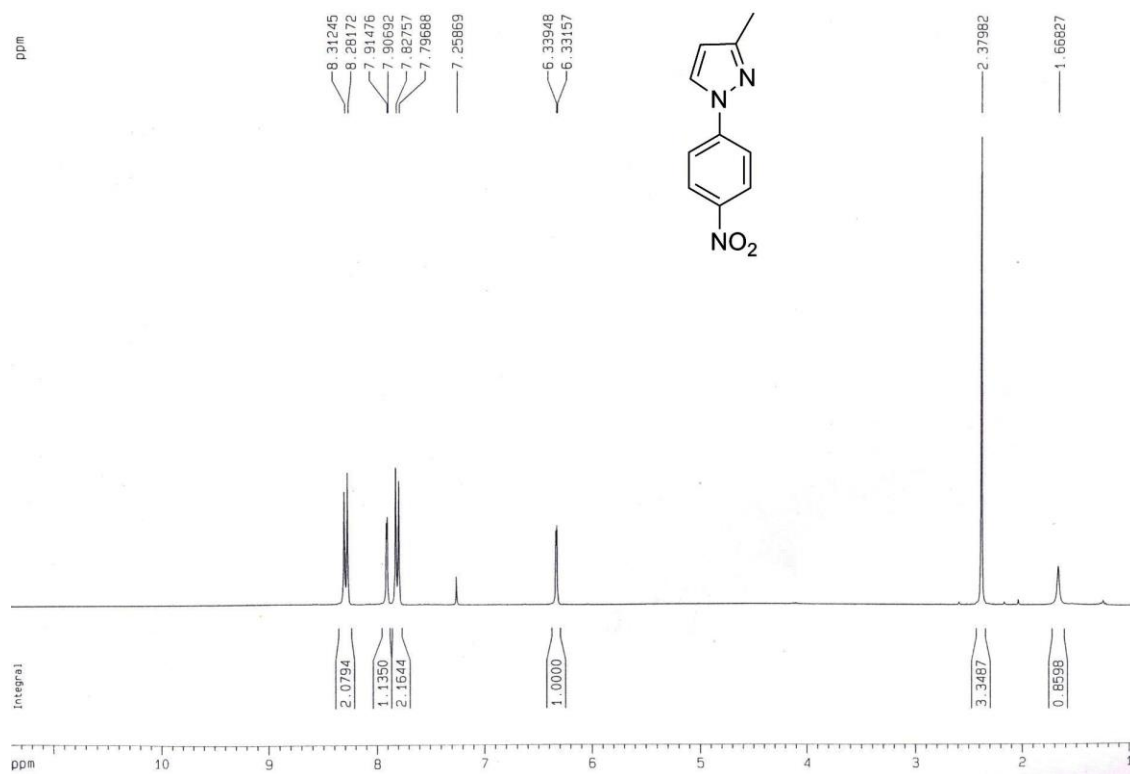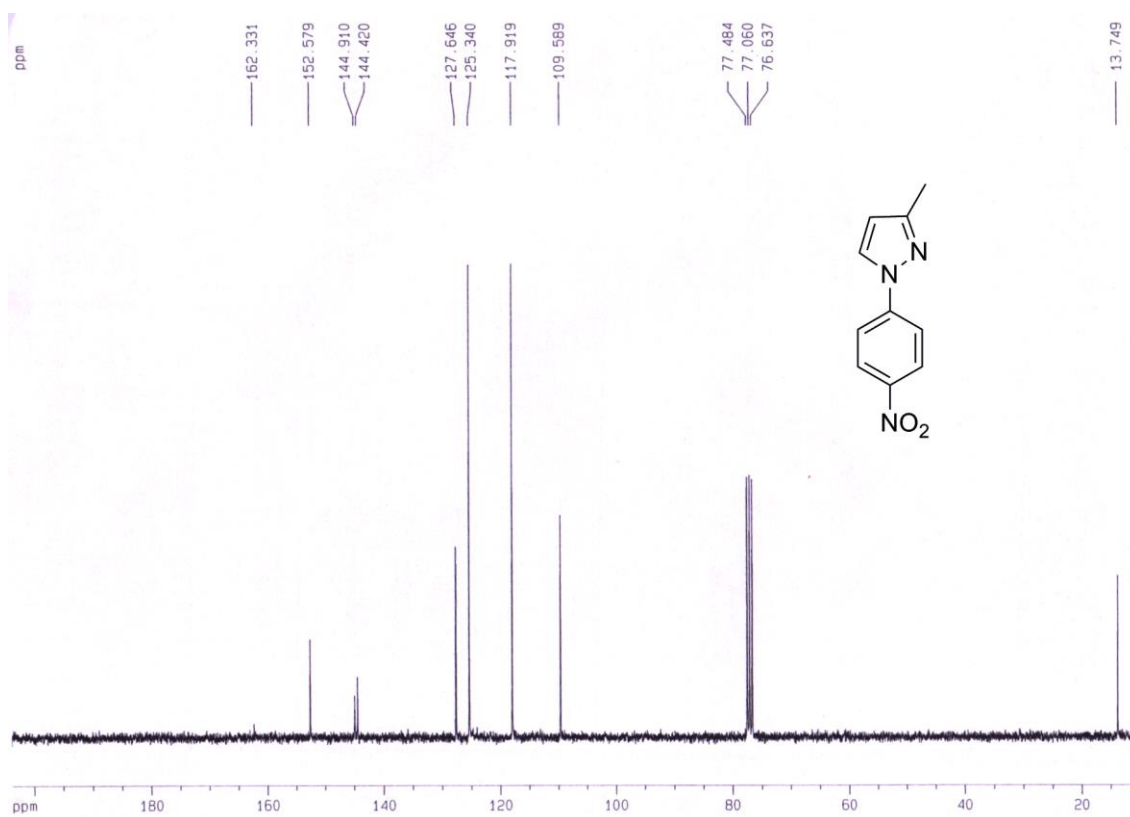

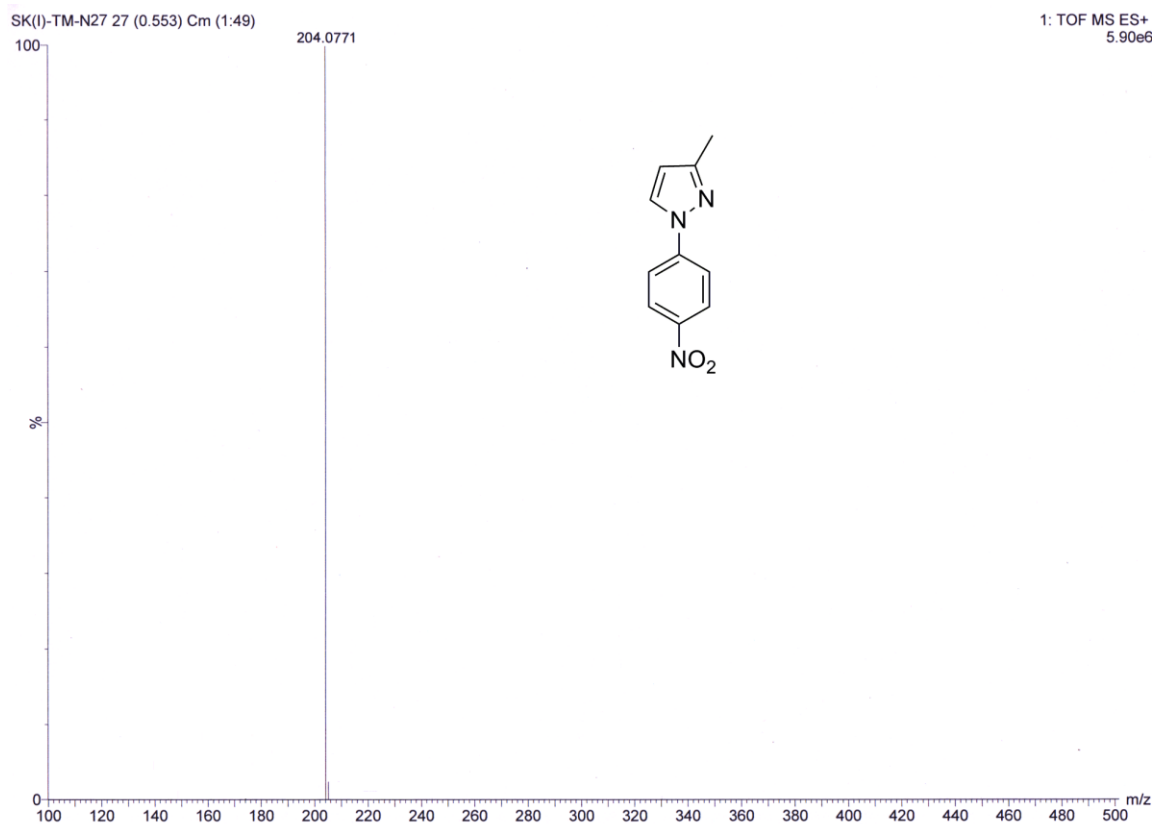

3,5-dimethyl-pyrazole-*p*-nitrobenzene (Table 2, entry 2c):  $^1\text{H-NMR}$  (300 MHz,  $\text{CDCl}_3$ ):  $\delta$  (ppm): 8.31 (d,  $J = 9.06$  Hz, 2H), 7.67 (d,  $J = 9.06$  Hz, 2H), 6.07 (s, 1H), 2.42 (s, 3H), 2.29 (s, 3H);  $^{13}\text{C-NMR}$  (75 MHz,  $\text{CDCl}_3$ ):  $\delta$  (ppm): 150.84, 145.62, 145.06, 139.86, 124.71, 123.50, 109.35, 13.50, 13.13; HRMS (ESI): calcd. for  $[\text{M}+\text{H}]^+$  ( $\text{C}_{11}\text{H}_{12}\text{N}_3\text{O}_2$ ) requires  $m/z$  218.0930, found 218.0923; Anal. Calcd. for  $\text{C}_{11}\text{H}_{11}\text{N}_3\text{O}_2$ : C, 60.82%; H, 5.10%; N, 19.34%. Found: C, 60.85%; H, 5.11%; N, 19.31%.

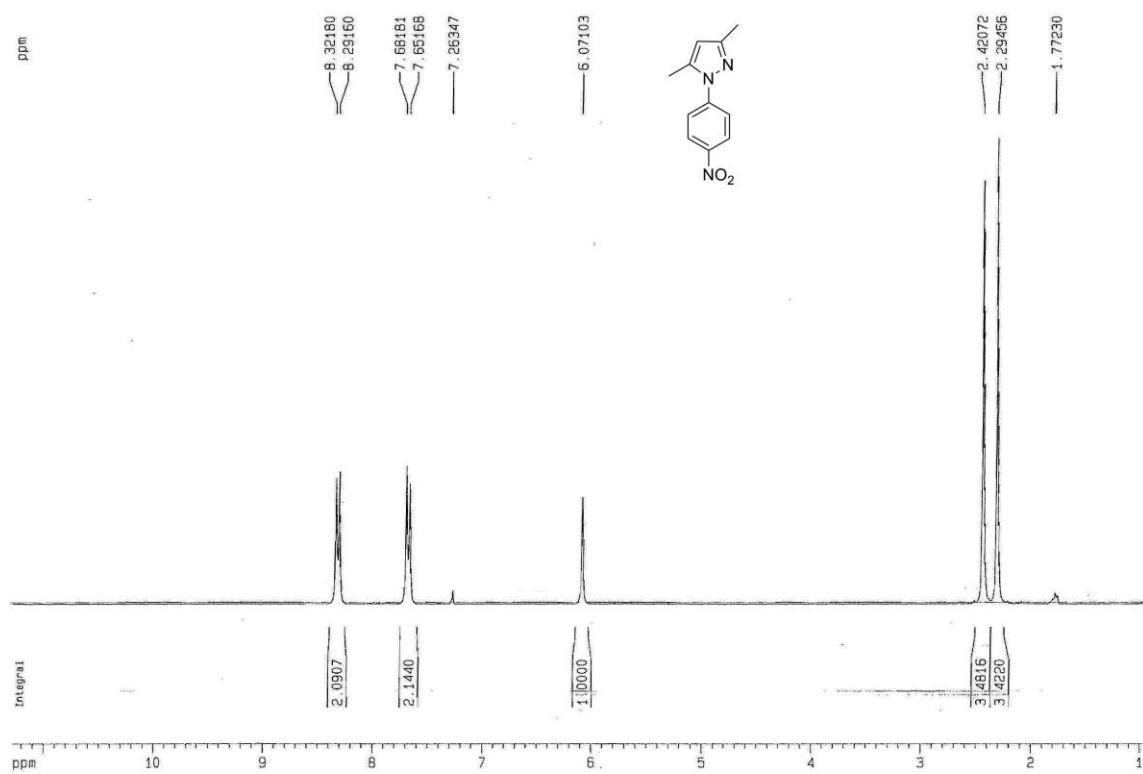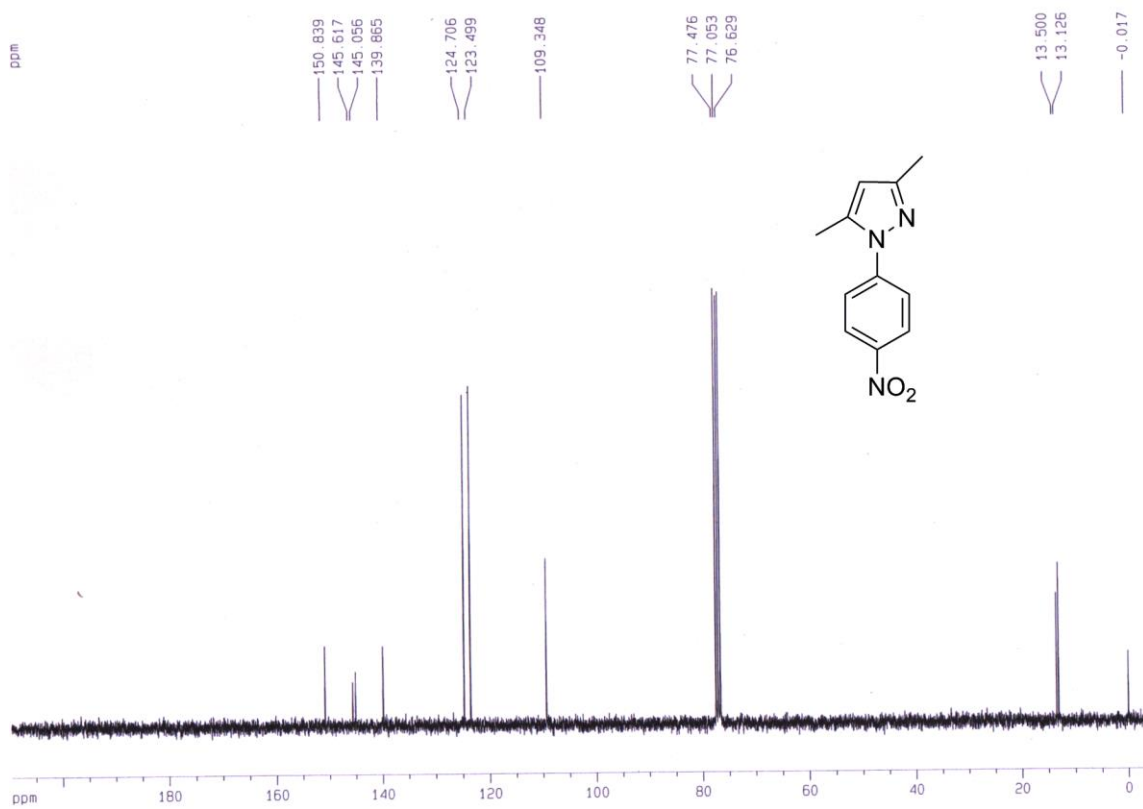

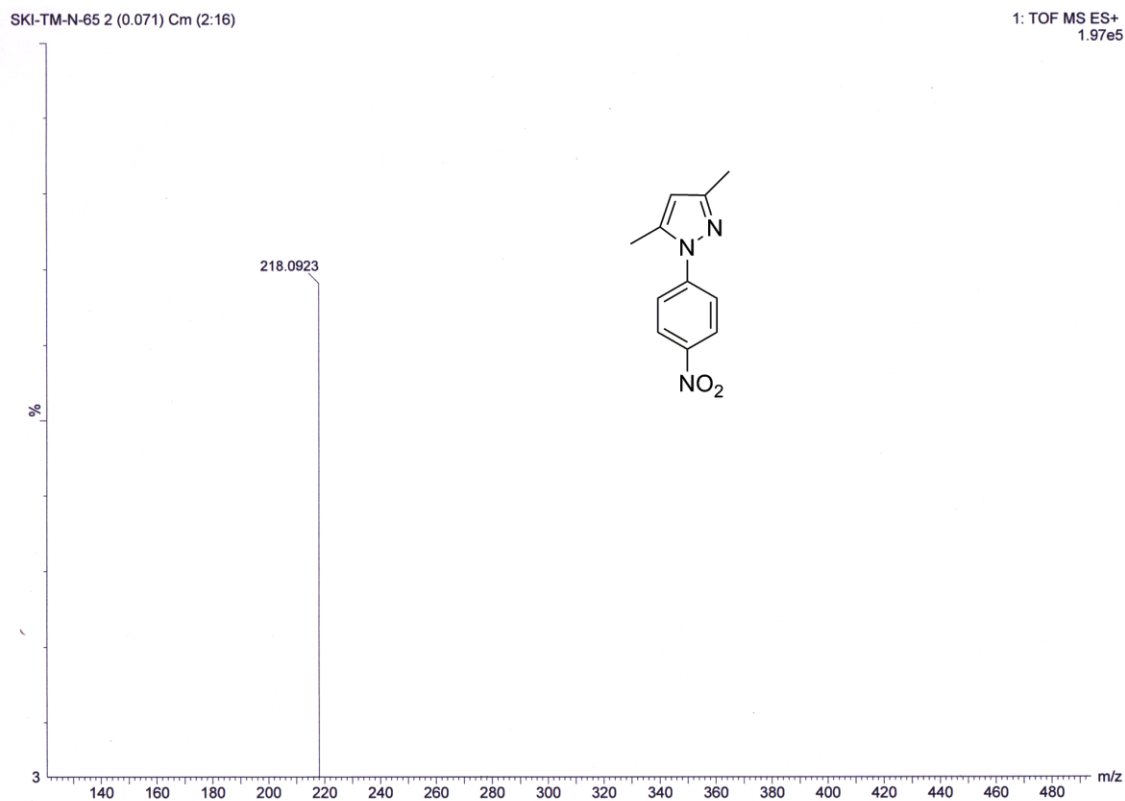

indazole-*p*-nitrobenzene (Table 2, entry 2d):  $^1\text{H-NMR}$  (300 MHz,  $\text{CDCl}_3$ ):  $\delta$  (ppm): 8.35-8.32 (m, 2H), 8.27-8.24 (m, 1H), 7.93-7.90 (m, 2H), 7.81 (d,  $J = 7.81$  Hz, 2H), 7.53-7.48 (m, 1H), 7.32-7.27 (m, 1H);  $^{13}\text{C-NMR}$  (75 MHz,  $\text{CDCl}_3$ ):  $\delta$  (ppm): 147.27, 143.55, 134.11, 133.67, 125.99, 123.15, 118.80, 116.76, 103.37; HRMS (ESI): calcd. for  $[\text{M}+\text{H}]^+$  ( $\text{C}_{13}\text{H}_{10}\text{N}_3\text{O}_2$ ) requires  $m/z$  240.0773, found 240.0774; Anal. Calcd. for  $\text{C}_{13}\text{H}_9\text{N}_3\text{O}_2$ : C, 65.27%; H, 3.79%; N, 17.56%. Found: C, 65.26%; H, 3.80%; N, 17.55%.

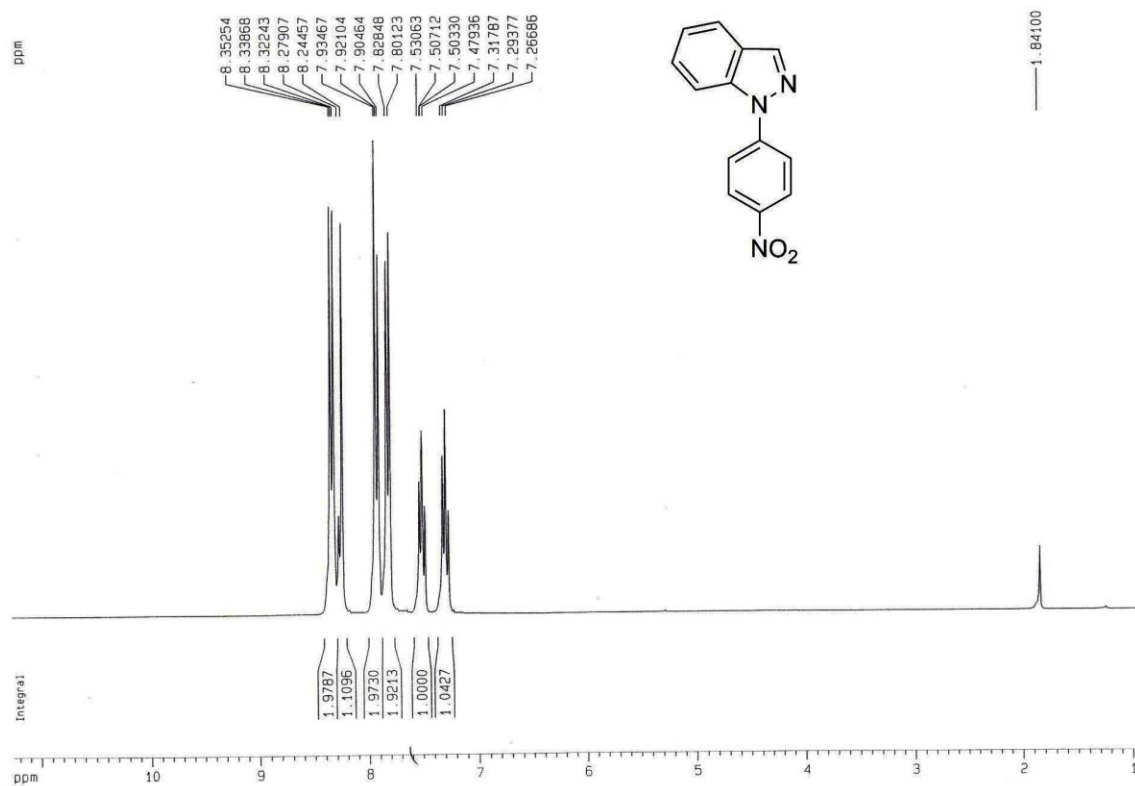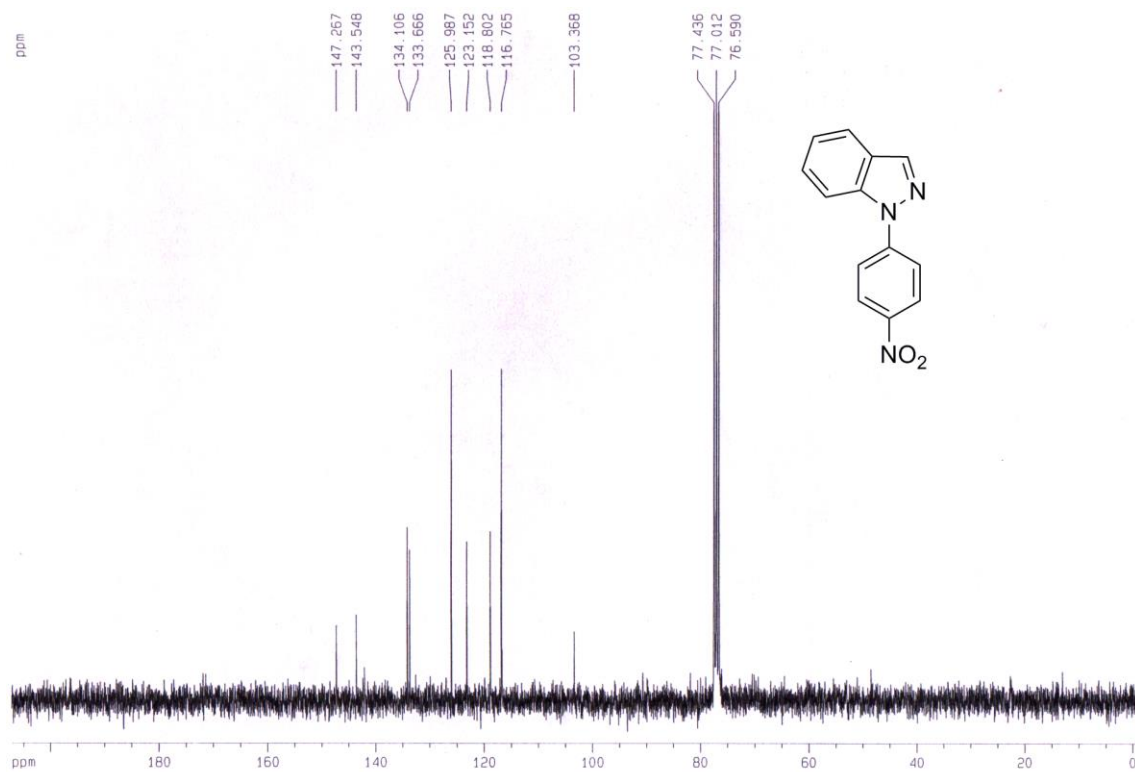

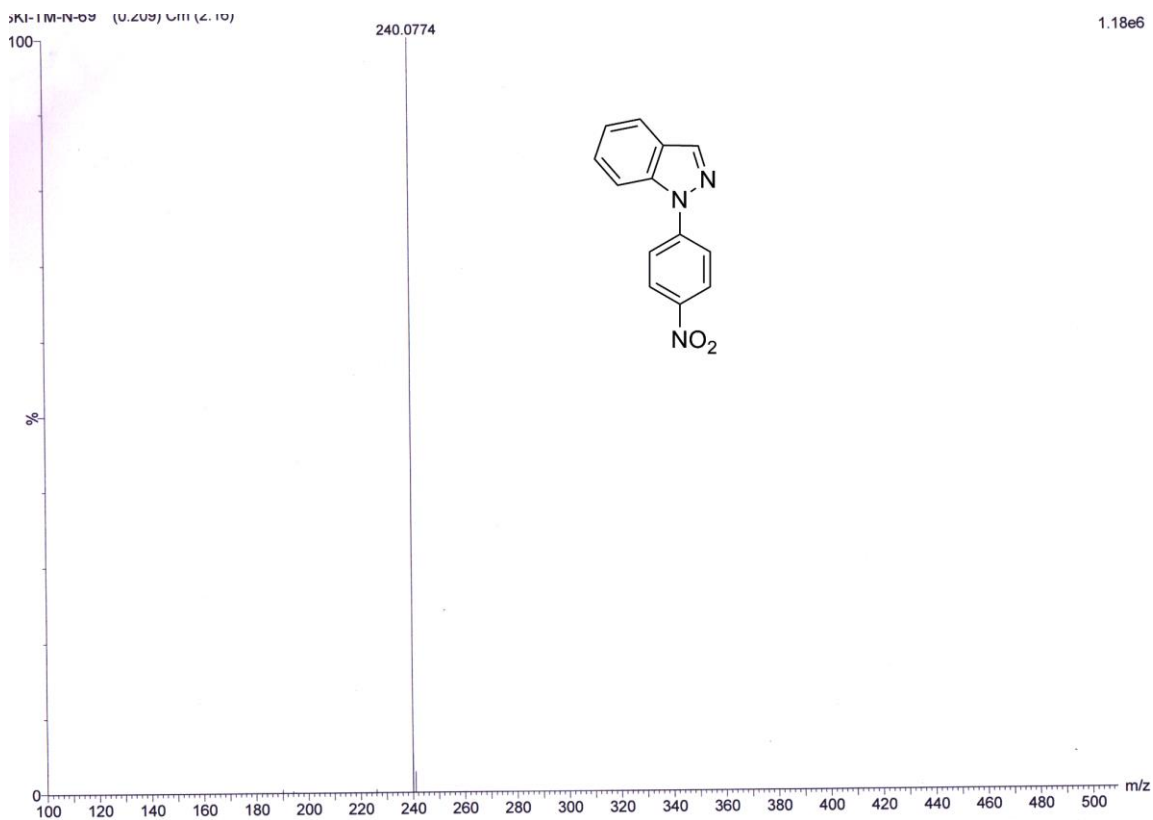

imidazole-*o*-nitrobenzene (Table 2, entry 2e):  $^1\text{H-NMR}$  (300 MHz,  $\text{CDCl}_3$ ):  $\delta$  (ppm): 7.96 (d,  $J = 8.1$  Hz, 1H), 7.70 (t,  $J = 7.7$  Hz, 1H), 7.61-7.56 (m, 2H), 7.45-7.35 (m, 1H), 7.15 (s, 1H), 7.03 (s, 1H);  $^{13}\text{C-NMR}$  (75 MHz,  $\text{CDCl}_3$ ):  $\delta$  (ppm): 145.23, 137.24, 133.91, 130.45, 130, 129.81, 128.73, 125.37, 120.40; HRMS (ESI): calcd. for  $[\text{M}+\text{H}]^+$  ( $\text{C}_9\text{H}_8\text{N}_3\text{O}_2$ ) requires  $m/z$  190.0617, found 190.0616; Anal. Calcd. for  $\text{C}_9\text{H}_7\text{N}_3\text{O}_2$ : C, 57.14%; H, 3.73%; N, 22.21. Found: C, 57.15%; H, 3.72%; N, 22.23.



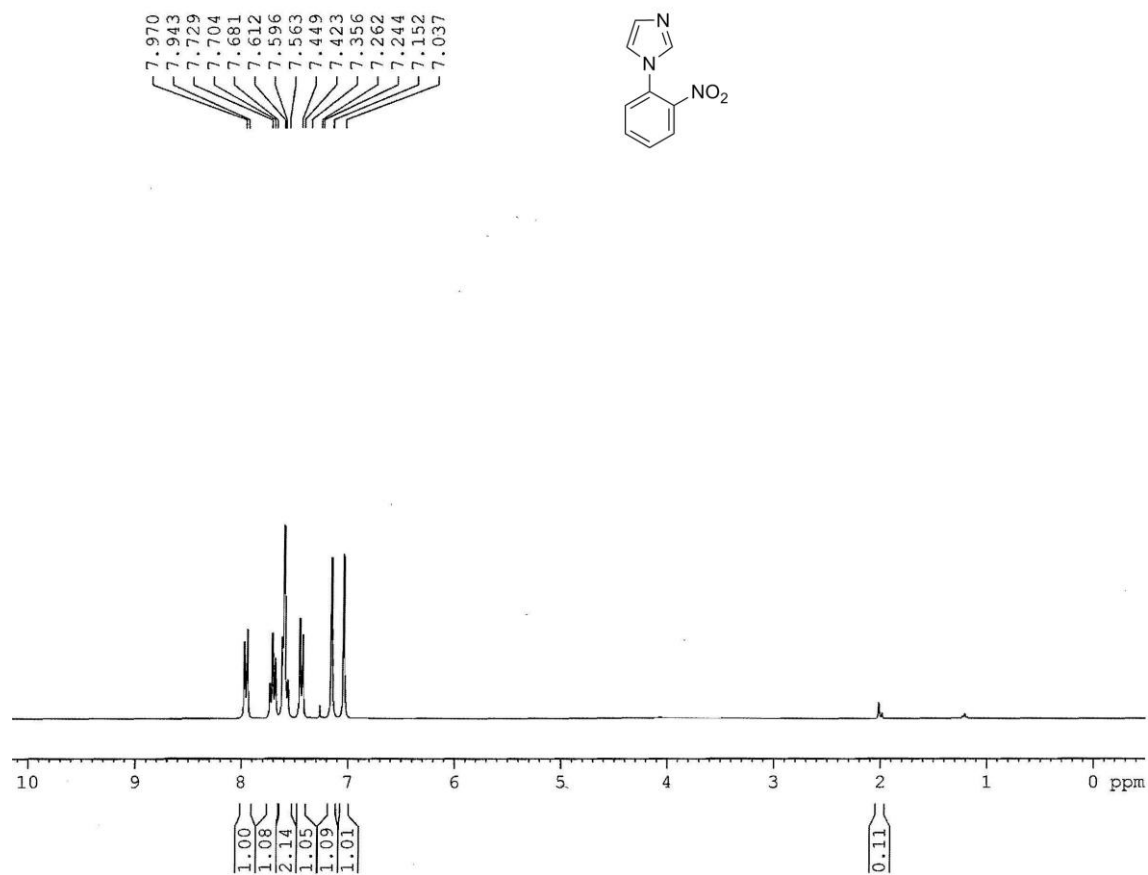

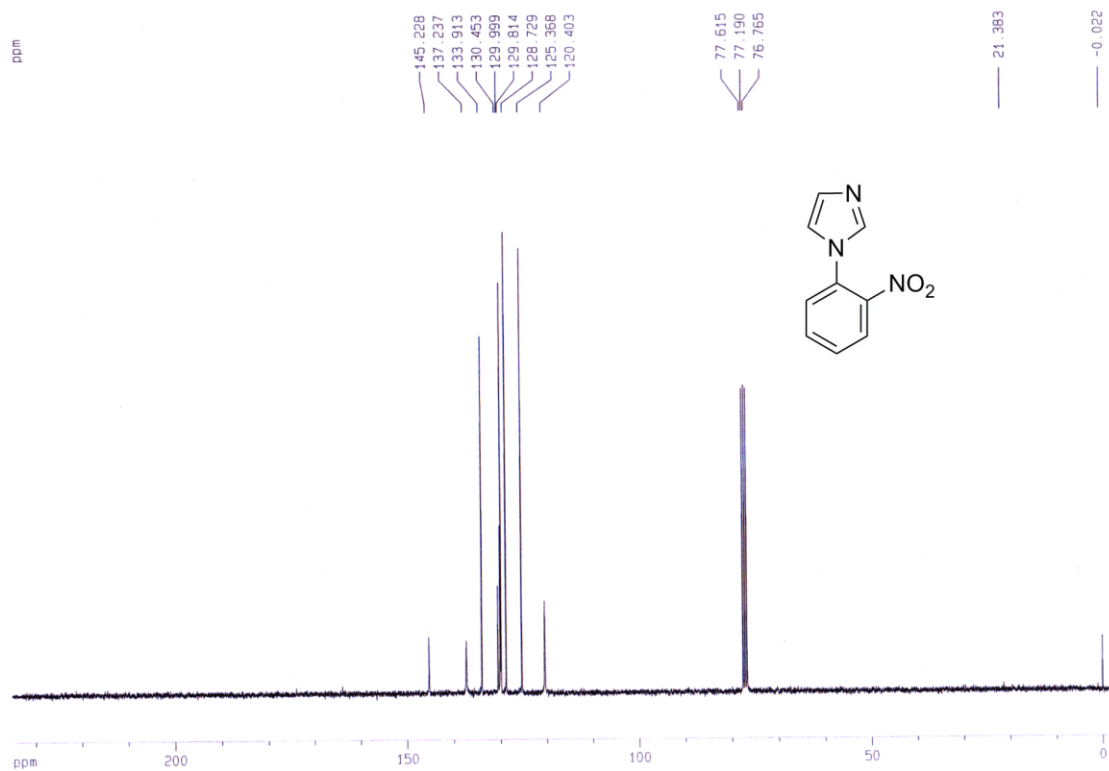

SK(l)-TM-N67 7 (0.155) Cm (1:46)

1: TOF MS ES+  
5.76e6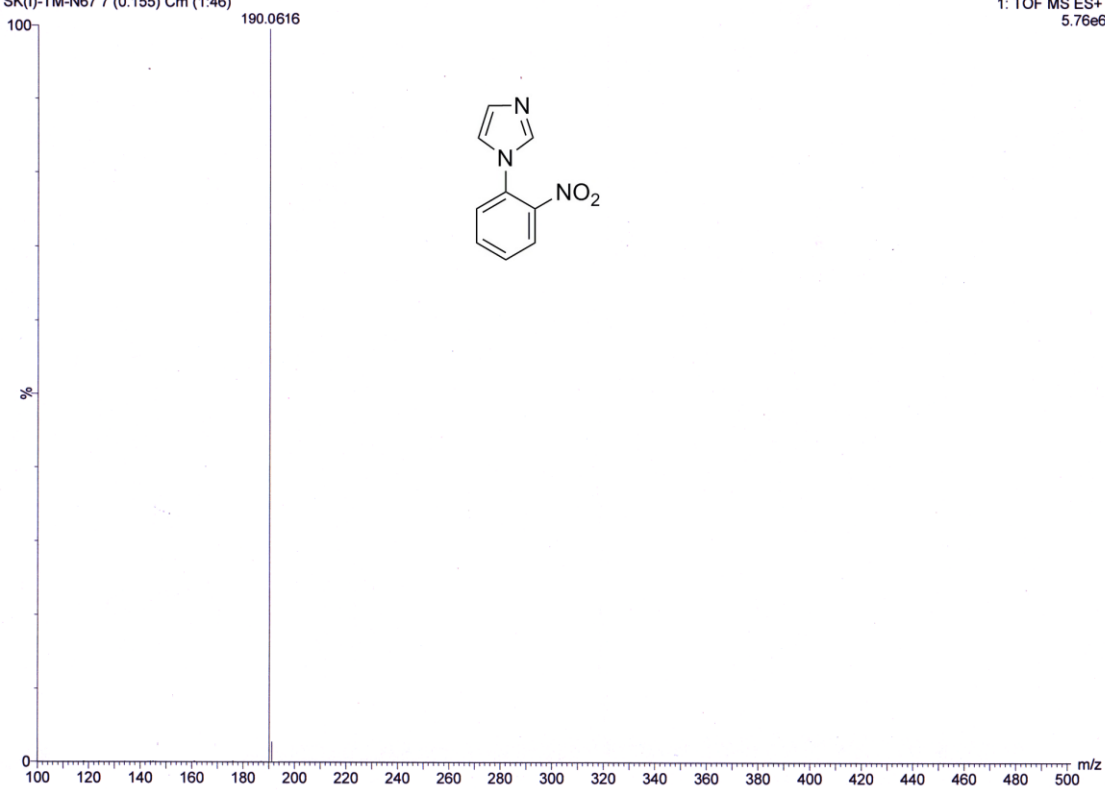

imidazole-*p*-nitrobenzene (Table 2, entry 2f):  $^1\text{H-NMR}$  (300 MHz,  $\text{CDCl}_3$ ):  $\delta$  (ppm): 8.38 (d,  $J = 8.91$  Hz, 2H), 7.98 (s, 1H), 7.58 (d,  $J = 8.94$  Hz, 2H), 7.38 (s, 1H), 7.27 (d,  $J = 6.1$  Hz, 1H);  $^{13}\text{C-NMR}$  (75 MHz,  $\text{CDCl}_3$ ):  $\delta$  (ppm): 146.34, 142.01, 135.47, 131.76, 125.78, 121.09, 117.68; HRMS (ESI): calcd. for  $[\text{M}+\text{H}]^+$  ( $\text{C}_9\text{H}_8\text{N}_3\text{O}_2$ ) requires  $m/z$  190.0617, found 190.0409; Anal. Calcd. for  $\text{C}_9\text{H}_7\text{N}_3\text{O}_2$ : C, 57.14%; H, 3.73%; N, 22.21%. Found: C, 57.17%; H, 3.73%; N, 22.19%.

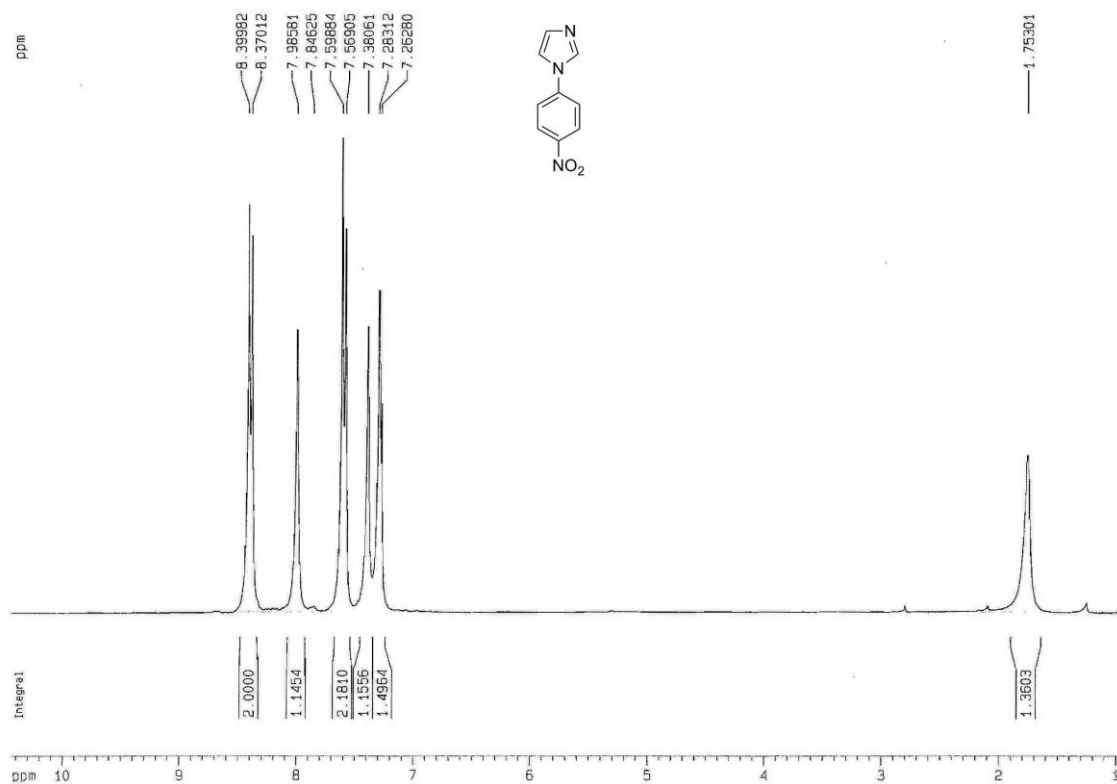

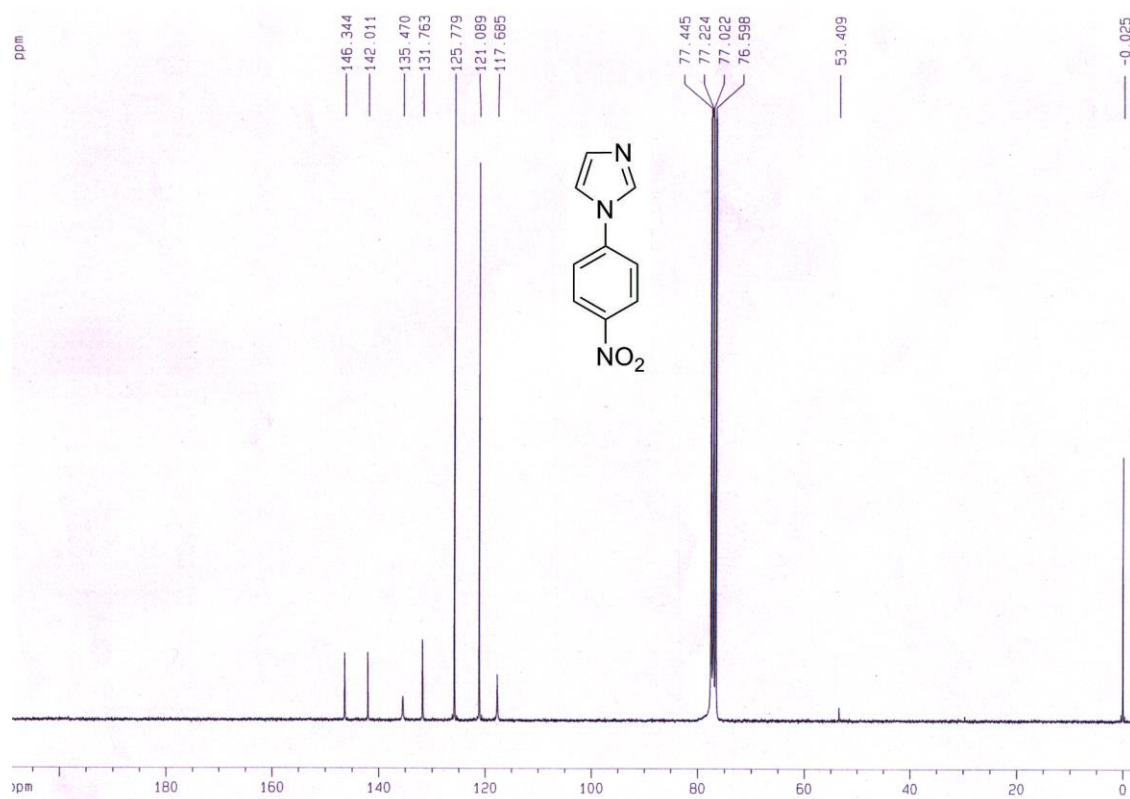

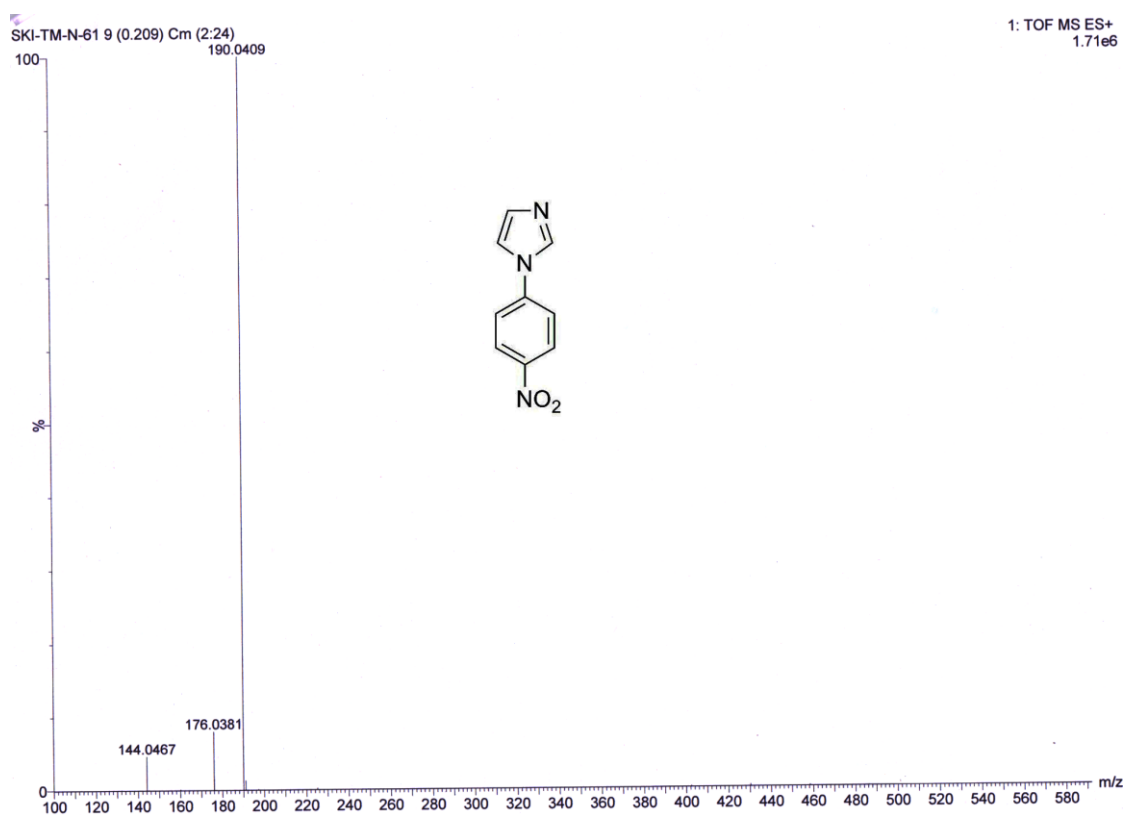

imidazole-m-nitrobenzene (Table 2, entry 2g):  $^1\text{H}$  NMR (300 MHz,  $\text{CDCl}_3$ ):  $\delta$  (ppm): 8.29-8.23 (m, 2H), 7.99 (s, 1H), 7.78-7.68 (m, 2H), 7.31 (m, 2H); HRMS (ESI): calcd. for  $[\text{M}+\text{H}]^+$  ( $\text{C}_9\text{H}_8\text{N}_3\text{O}_2$ ) requires  $m/z$  190.0617, found 190.0516; Anal. Calcd. for  $\text{C}_9\text{H}_7\text{N}_3\text{O}_2$ : C, 57.14%; H, 3.73%; N, 22.21%. Found: C, 57.21%; H, 3.78%; N, 22.25%.

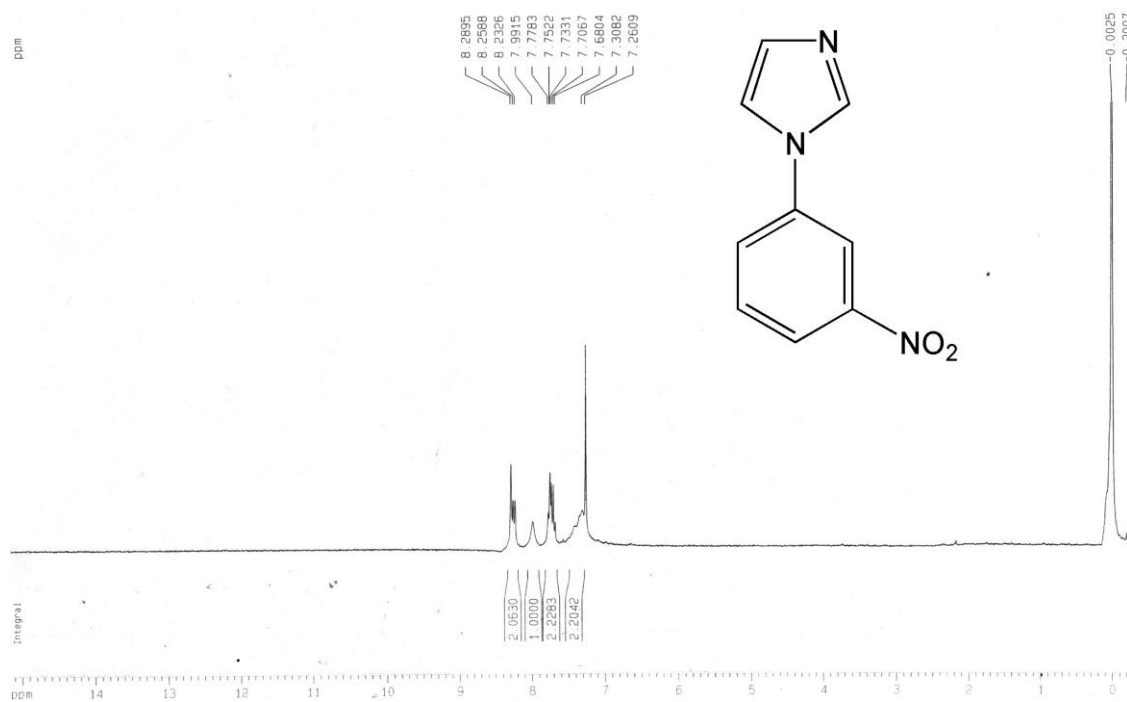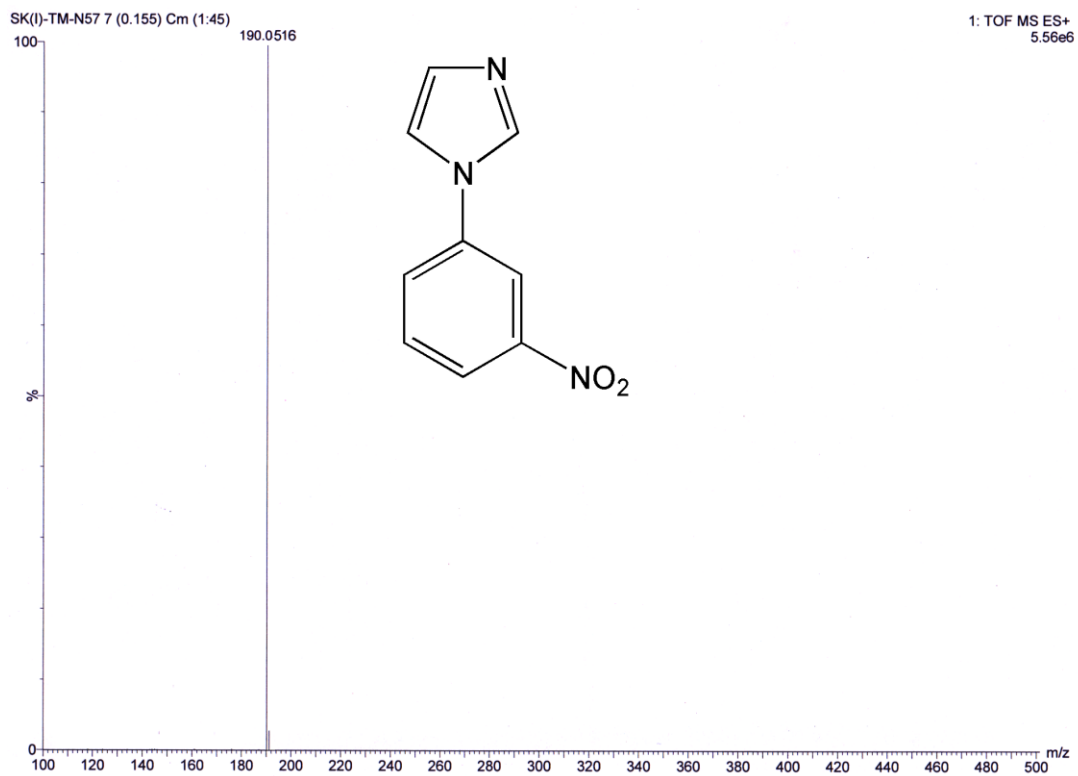

imidazole-m-bromobenzene (Table 2, entry 2h):  $^1\text{H-NMR}$  (300 MHz,  $\text{CDCl}_3$ ):  $\delta$  (ppm): 7.86 (s, 1H), 7.57-7.49 (m, 2H), 7.36-7.23 (m, 4H);  $^{13}\text{C-NMR}$  (75 MHz,  $\text{CDCl}_3$ ):  $\delta$  (ppm): 138.52, 131.20, 130.88, 130.57, 124.64, 123.43, 120.04; HRMS (ESI): calcd. for  $[\text{M}+\text{H}]^+$  ( $\text{C}_9\text{H}_8\text{BrN}_2$ ) requires  $m/z$  222.9793, found 222.9593; Anal. Calcd. for  $\text{C}_9\text{H}_7\text{BrN}_2$ : C, 48.46%; H, 3.16%; N, 12.56%. Found: C, 48.56%; H, 3.17%; N, 12.61%.

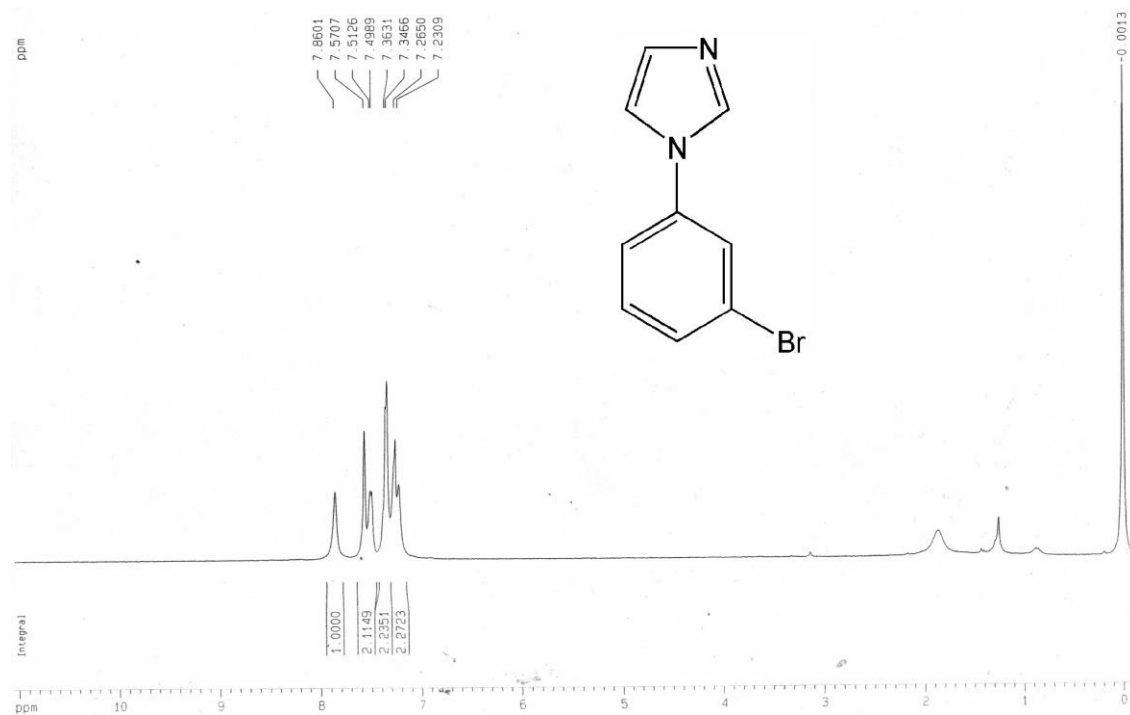

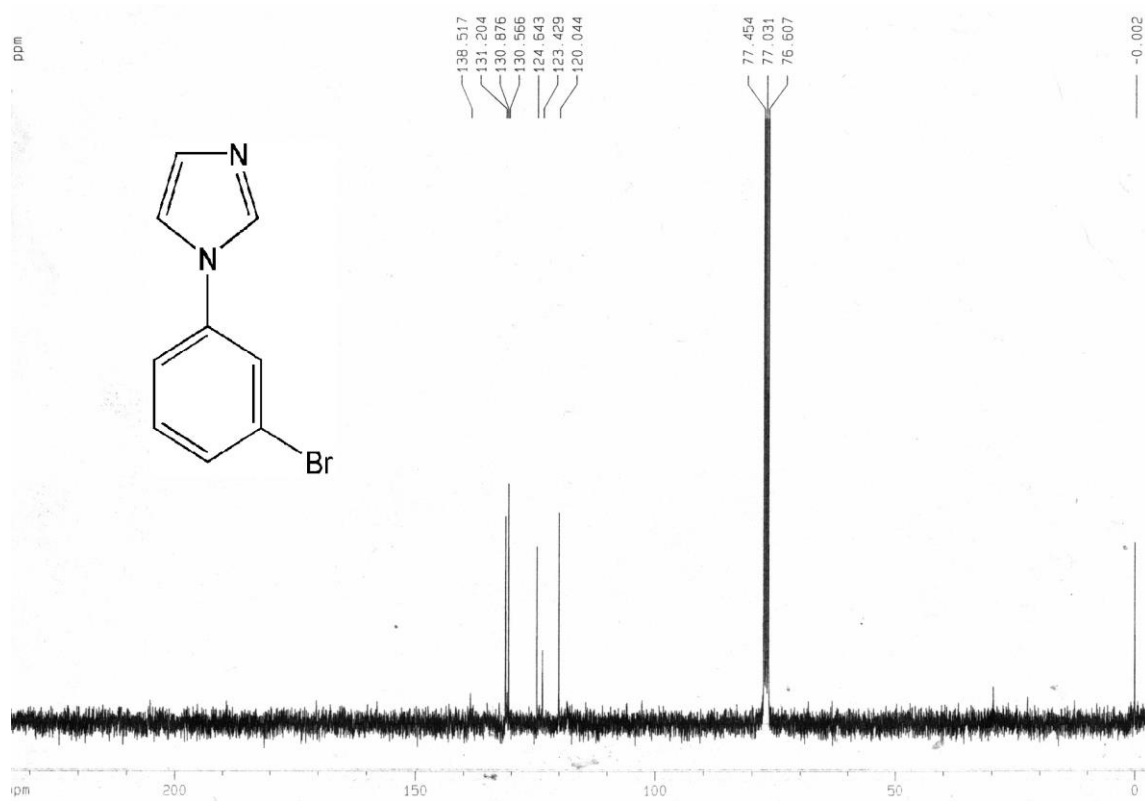



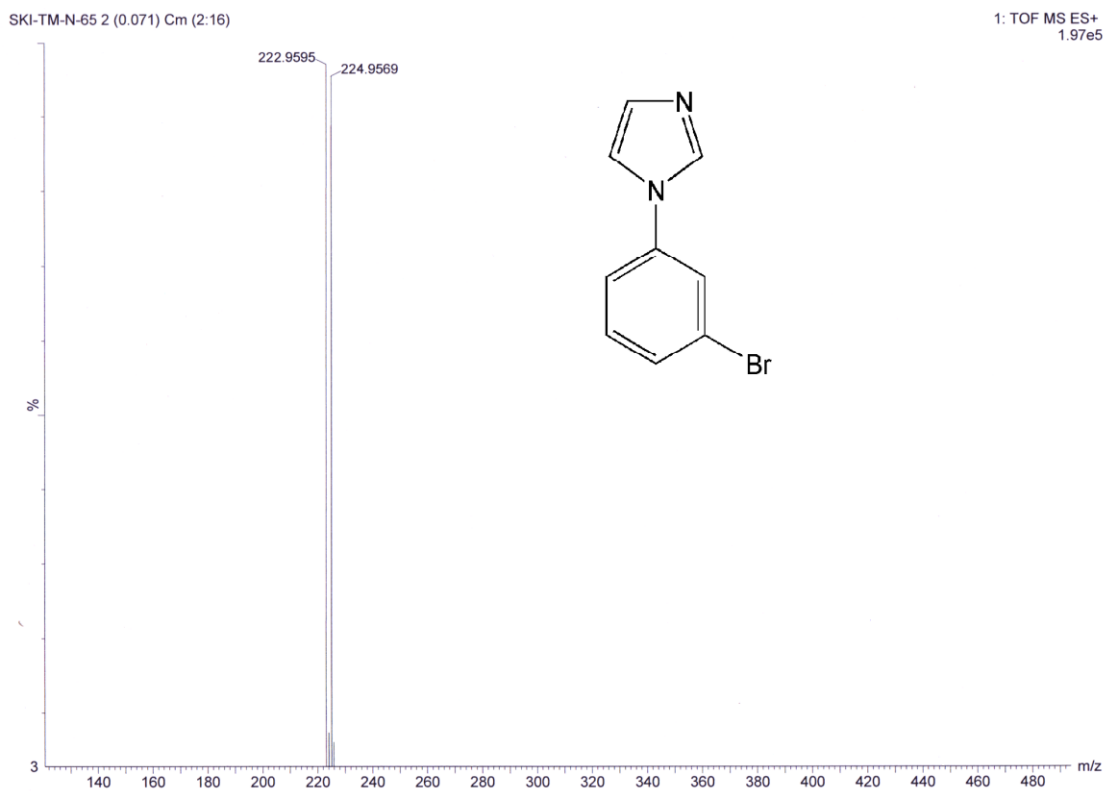

imidazole-*p*-benzonitrile (Table 2, entry 2i):  $^1\text{H-NMR}$  (300 MHz,  $\text{CDCl}_3$ ):  $\delta$  (ppm): 8.03-7.97 (m, 1H), 7.84-7.81 (m, 2H), 7.57-7.54 (m, 2H), 7.37 (s, 1H), 7.28 (s, 1H);  $^{13}\text{C-NMR}$  (75 MHz,  $\text{CDCl}_3$ ):  $\delta$  (ppm): 140.51, 134.49, 134.12, 131.53, 121.34, 119.73, 117.86, 111.02; HRMS (ESI): calcd. for  $[\text{M}+\text{H}]^+$  ( $\text{C}_{10}\text{H}_8\text{N}_3$ ) requires  $m/z$  170.0718, found 170.0716; Anal. Calcd. for  $\text{C}_{10}\text{H}_7\text{N}_3$ : C, 70.99%; H, 4.17%; N, 24.84%. Found: C, 70.96%; H, 4.17%; N, 24.81%.

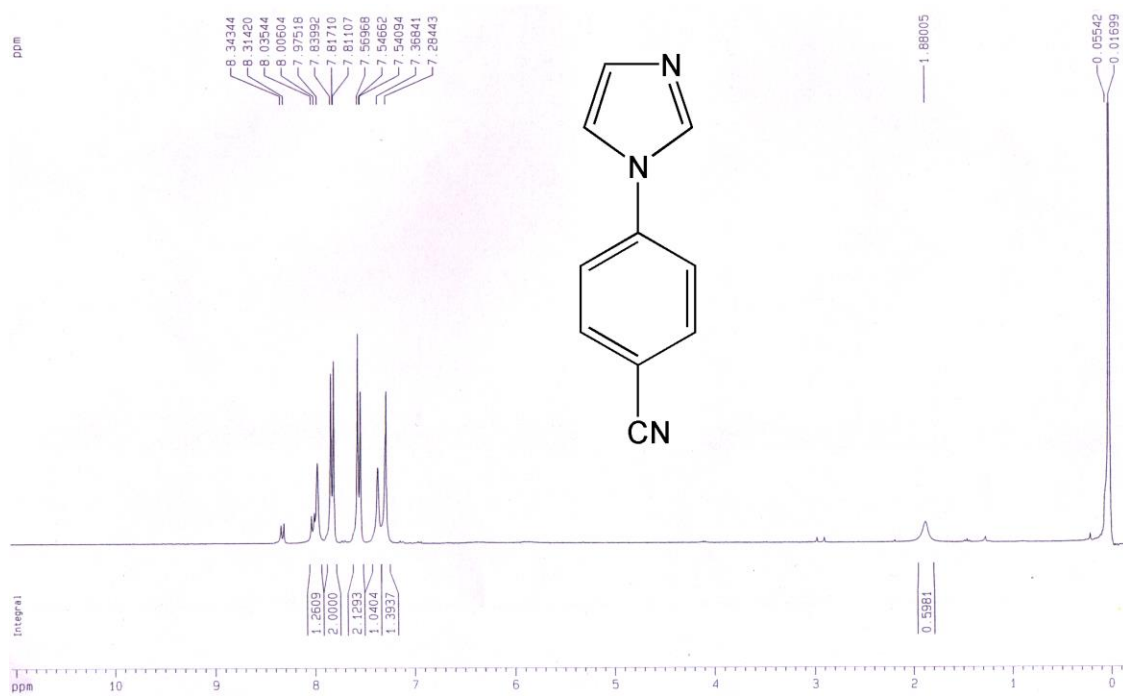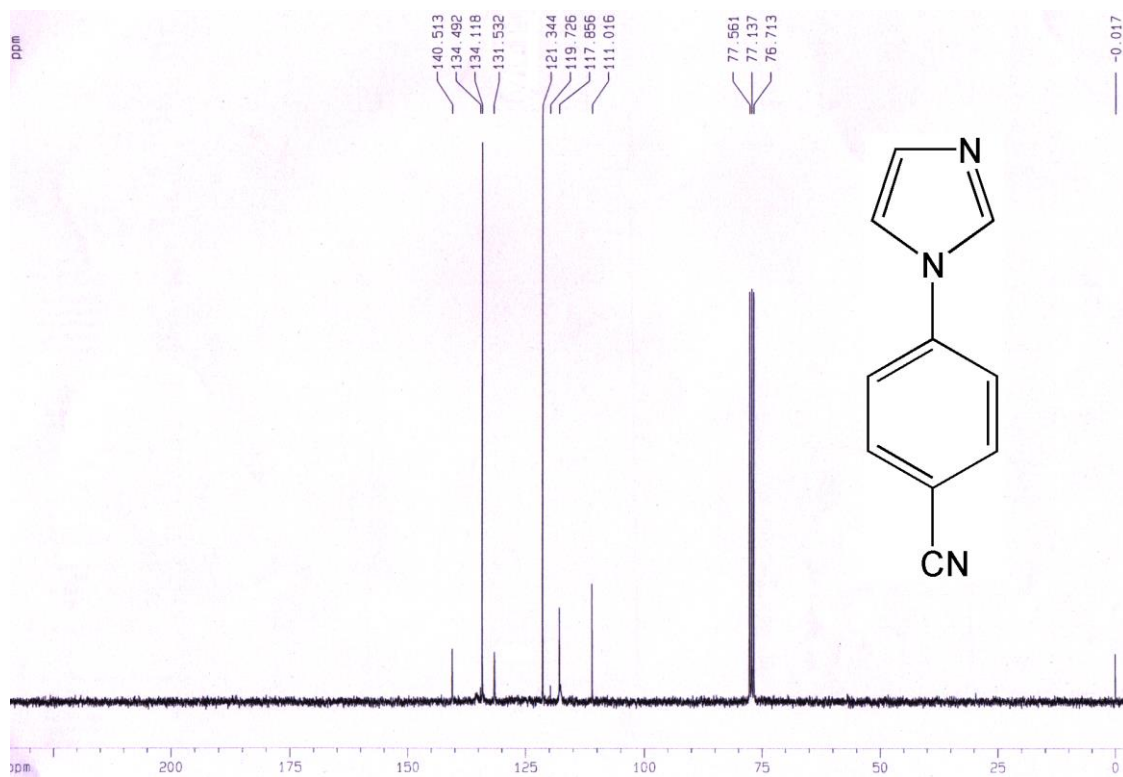

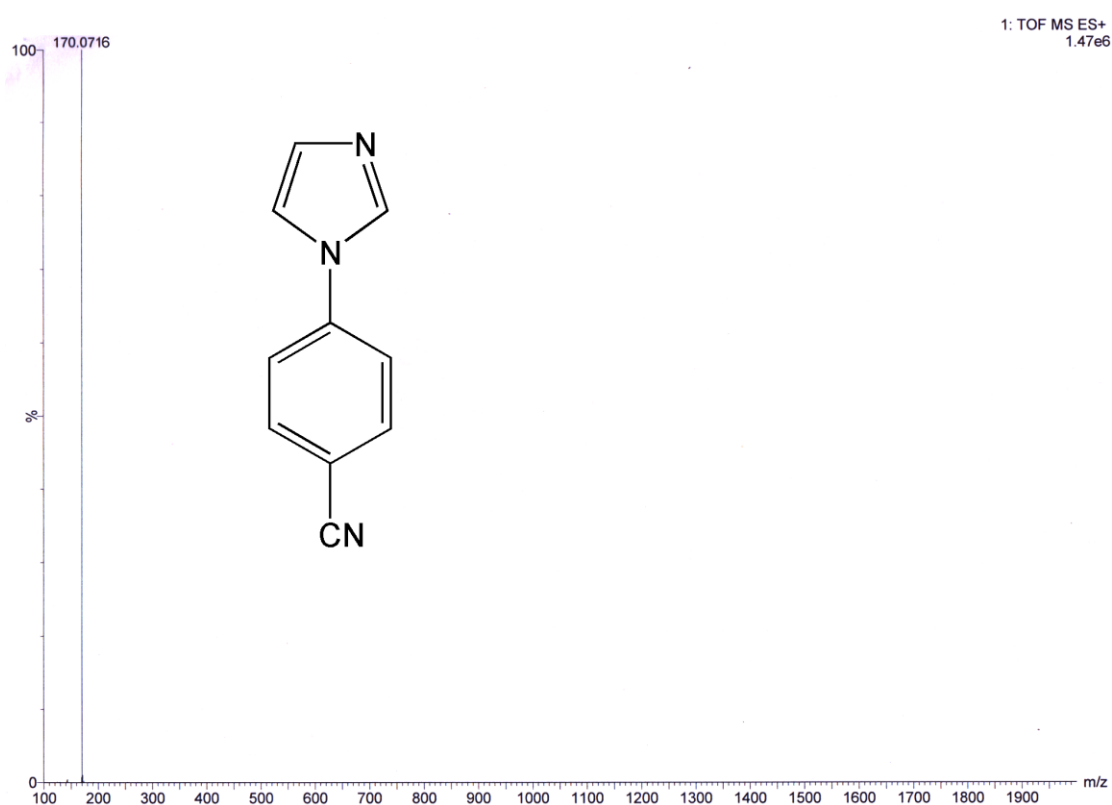

benzimidazole-*o*-nitrobenzene (Table 2, entry 2j):  $^1\text{H}$ -NMR (300 MHz,  $\text{CDCl}_3$ ):  $\delta$  (ppm): 8.07 (d,  $J = 1.42$  Hz, 1H), 7.98 (s, 1H), 7.84-7.81 (m, 1H), 7.75 (m, 1H), 7.62 (m, 1H), 7.52-7.49 (m, 1H), 7.29-7.24 (m, 2H), 7.11-7.09 (m, 1H),  $^{13}\text{C}$ -NMR (75 MHz,  $\text{CDCl}_3$ ):  $\delta$  (ppm): 145.8, 143.34, 142.51, 134.43, 134.37, 130.1, 129.76, 129.32, 125.94, 124.23, 123.18, 120.7, 109.53; Anal. Calcd. for  $\text{C}_{13}\text{H}_9\text{N}_3\text{O}_2$ : C, 65.27%; H, 3.79%; N, 17.56. Found: C, 65.29%; H, 3.77%; N, 17.55.

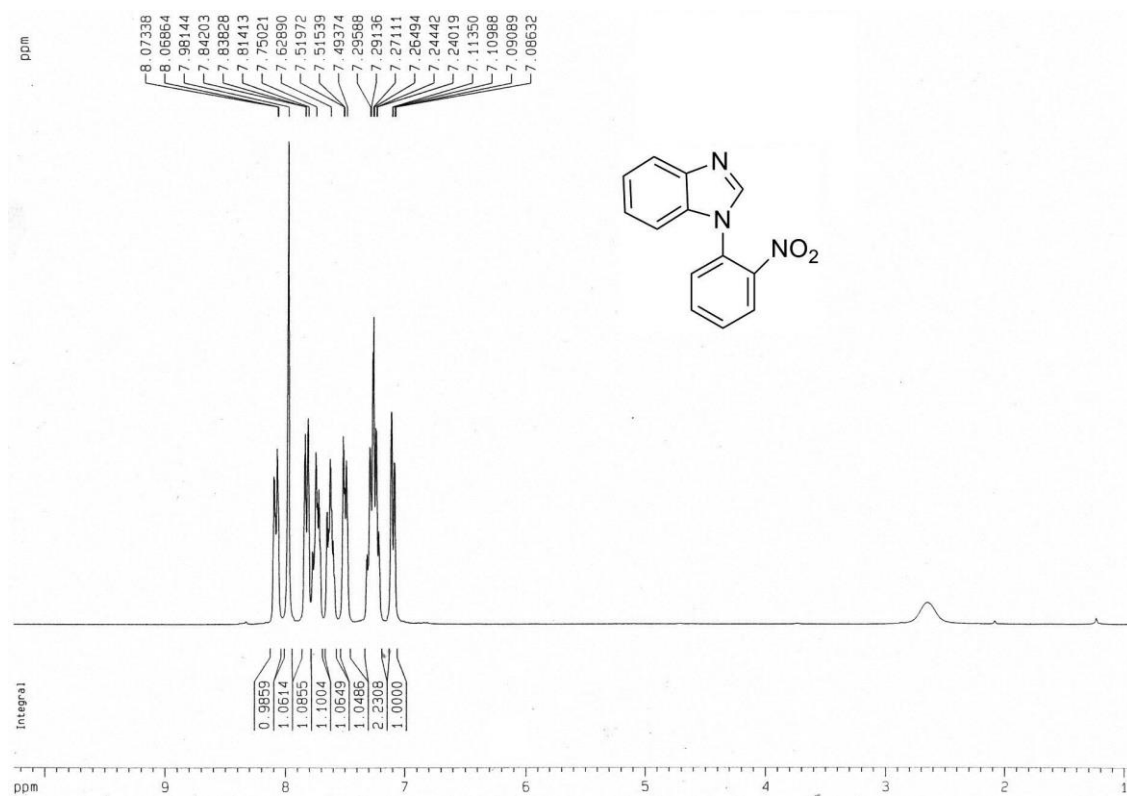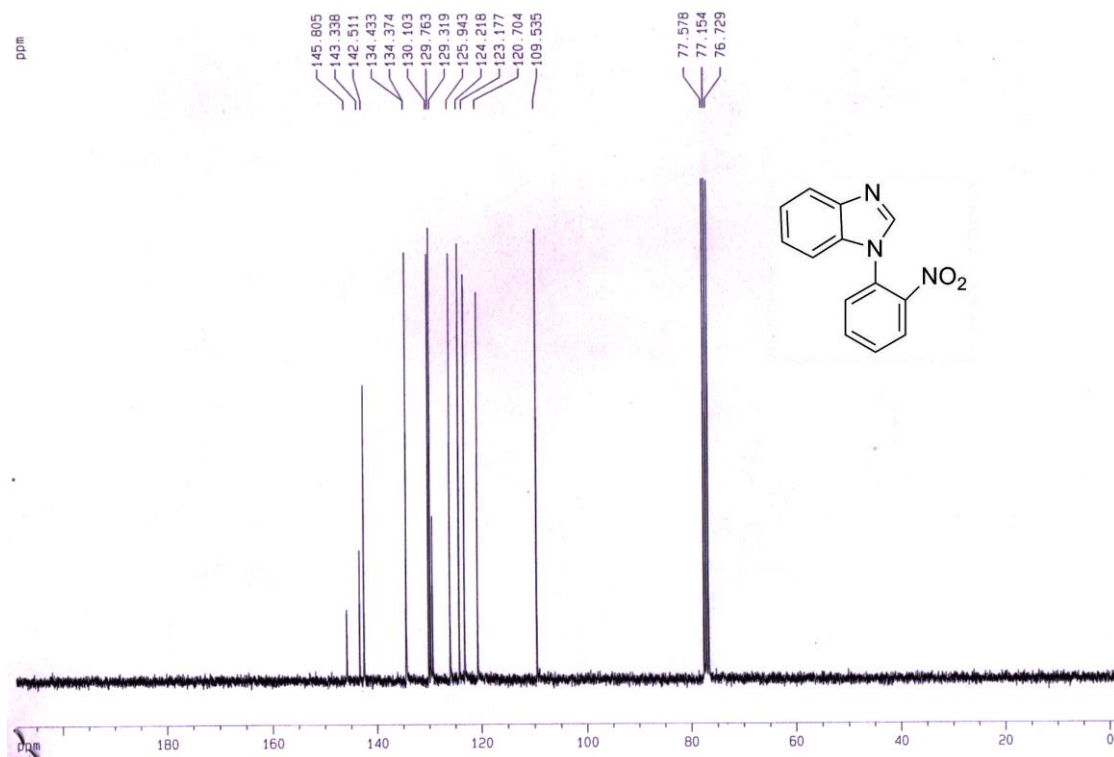

benzimidazole-*p*-benzonitrile (Table 2, entry 2k):  $^1\text{H-NMR}$  (300 MHz,  $\text{DMSO-d}_6$ ):  $\delta$  (ppm): 8.68 (s, 1H), 8.09 (d,  $J = 8.62$  Hz, 2H), 7.93 (d,  $J = 8.61$  Hz, 2H), 7.81-7.78 (m, 1H), 7.72-7.69 (m, 1H), 7.38-7.32 (m, 2H);  $^{13}\text{C-NMR}$  (75 MHz,  $\text{DMSO-d}_6$ ):  $\delta$  (ppm): 144.54, 143.67, 140.26, 134.76, 132.82, 124.40, 124.33, 123.50, 120.66, 118.79, 111.39, 110.32; HRMS (ESI): calcd. for  $[\text{M}+\text{H}]^+$  ( $\text{C}_{14}\text{H}_{10}\text{N}_3$ ) requires  $m/z$  220.0875, found 220.0876; Anal. Calcd. for  $\text{C}_{14}\text{H}_9\text{N}_3$ : C, 76.70%; H, 4.14%; N, 19.17. Found: C, 76.73%; H, 4.16%, N, 19.15.

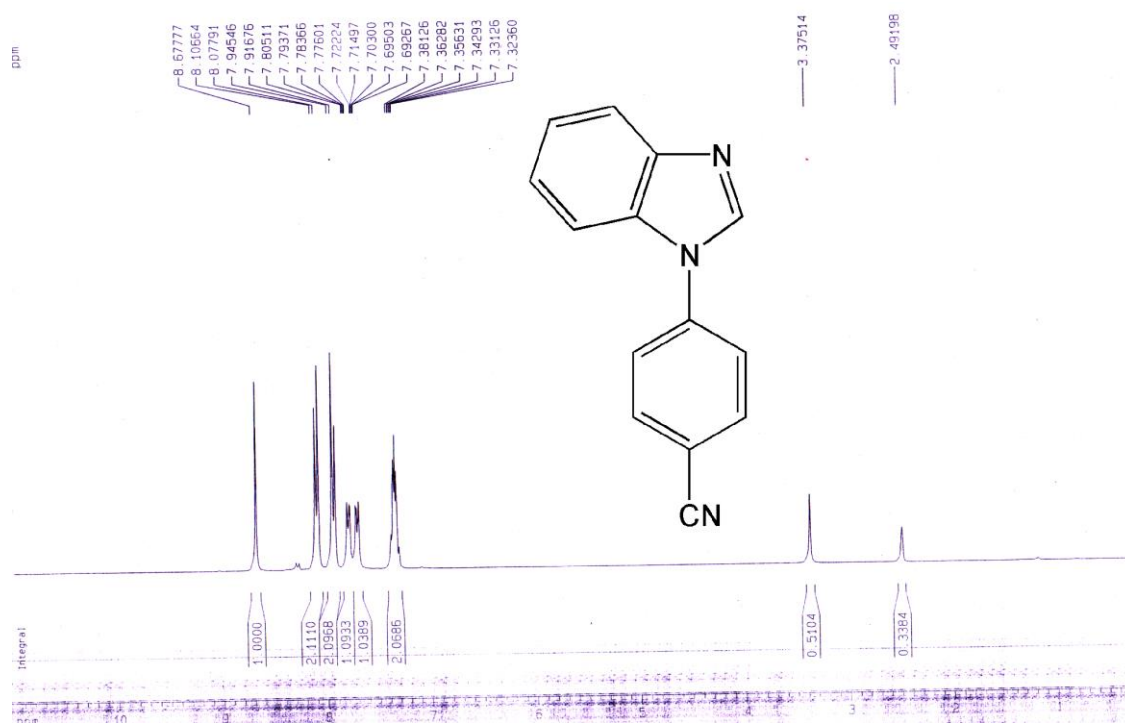

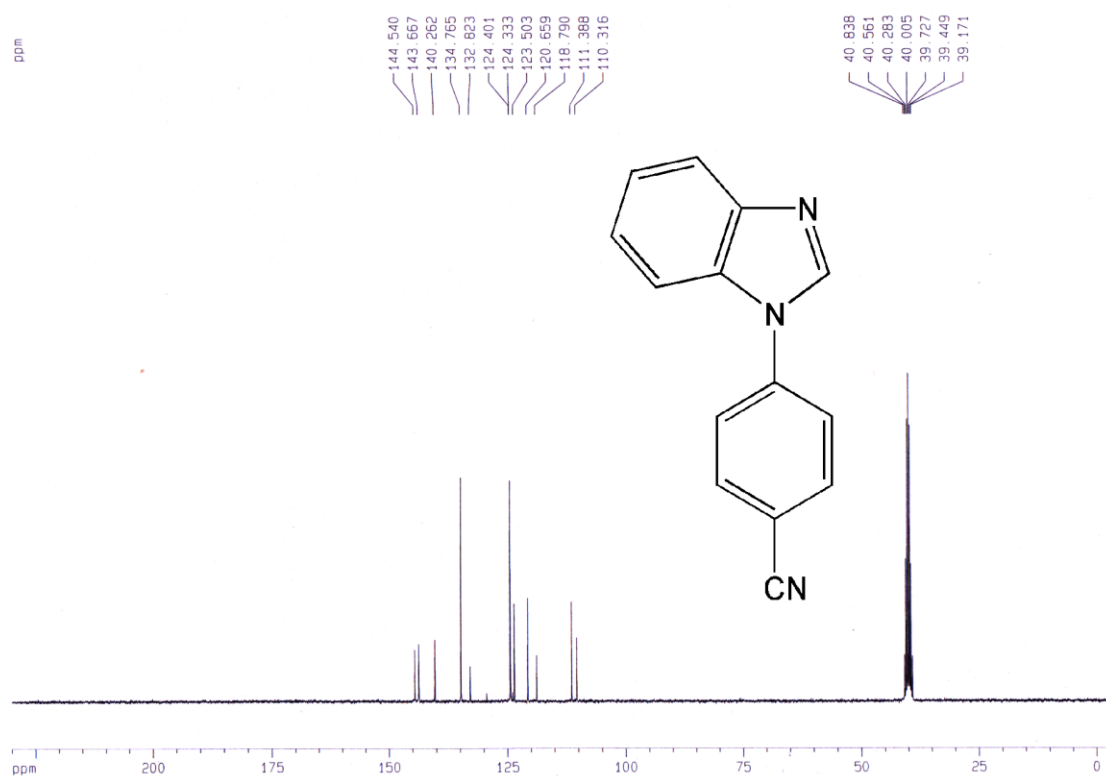

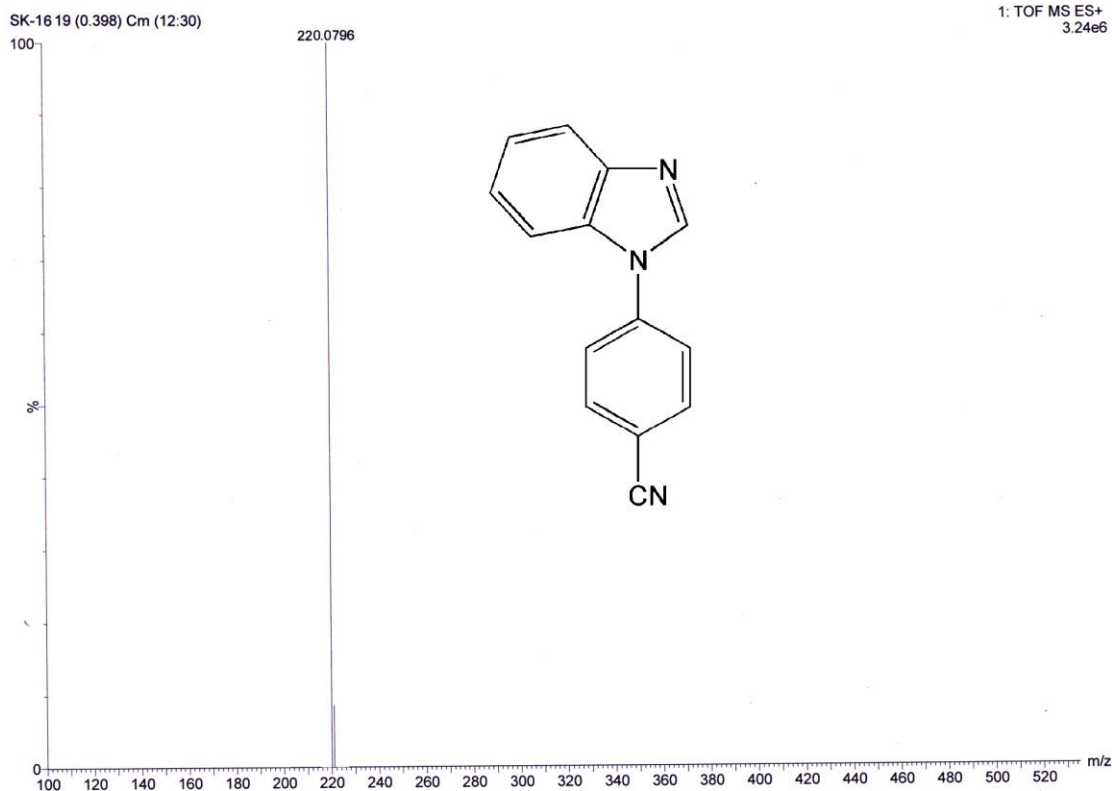

benzimidazole-*p*-nitrobenzene (Table 2, entry 21):  $^1\text{H-NMR}$  (300 MHz,  $\text{CDCl}_3$ ):  $\delta$  (ppm): 8.46 (d,  $J = 8.89$  Hz, 2H), 8.19 (s, 1H), 7.91-7.88 (m, 1H), 7.74 (d,  $J = 8.89$  Hz, 2H), 7.62-7.59 (s, 1H), 7.41-7.38 (m, 2H);  $^{13}\text{C-NMR}$  (75 MHz,  $\text{CDCl}_3$ ):  $\delta$  (ppm): 146.57, 144.44, 141.72, 141.61, 132.84, 125.84, 124.61, 123.74, 123.67, 121.19, 110.28; HRMS (ESI): calcd. for  $[\text{M}+\text{H}]^+$  ( $\text{C}_{13}\text{H}_{10}\text{N}_3\text{O}_2$ ) requires  $m/z$  240.0773, found 240.0772; Anal. Calcd. for  $\text{C}_{13}\text{H}_9\text{N}_3\text{O}_2$ : C, 65.27%; H, 3.79%; N, 17.56. Found: C, 65.25%; H, 3.78%, N, 17.56.

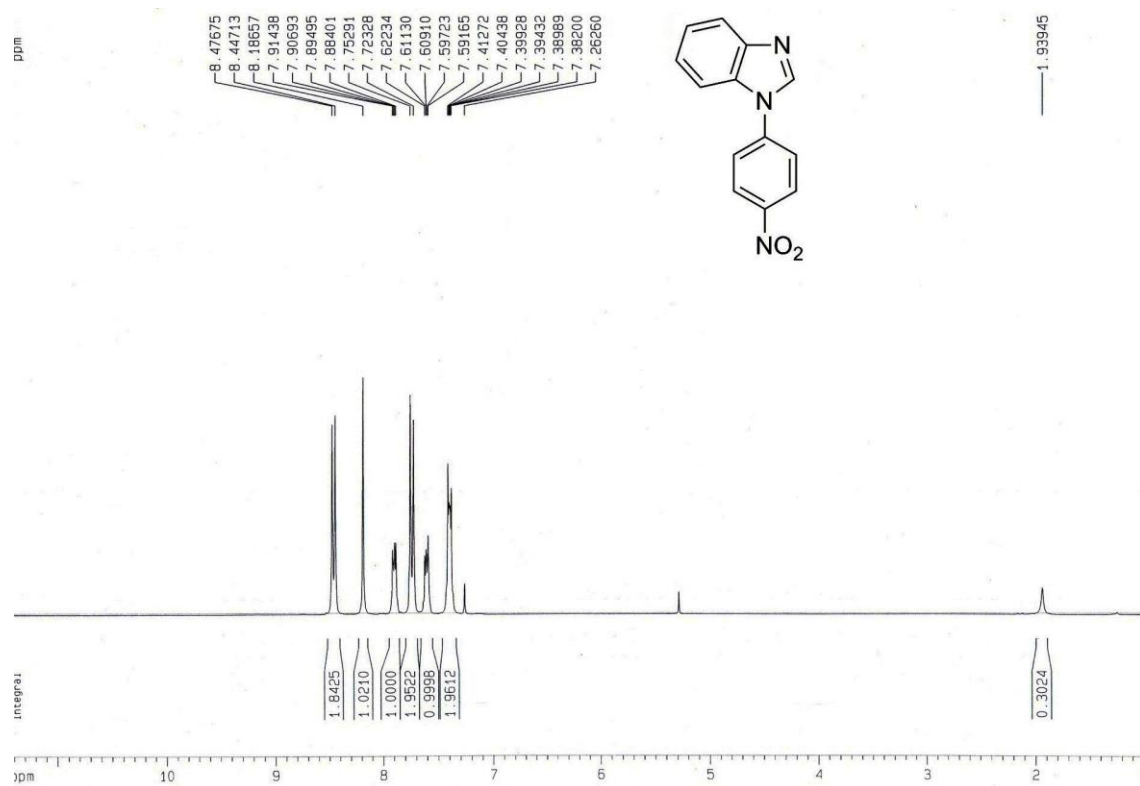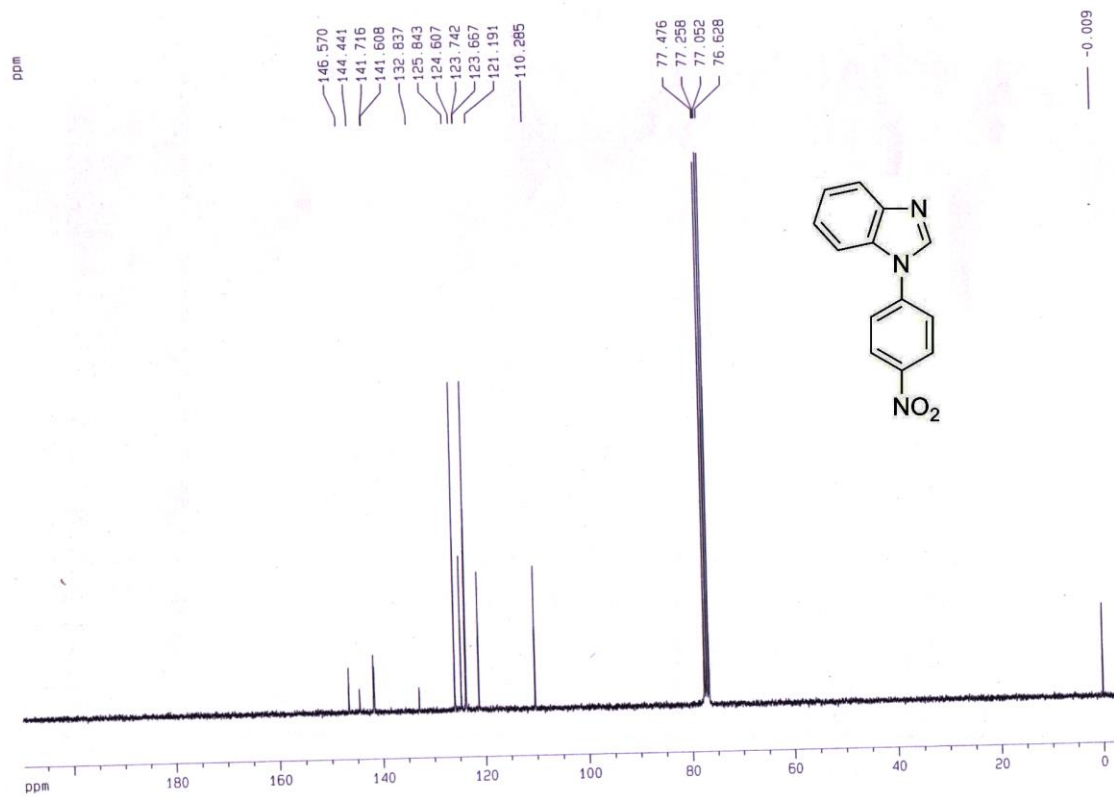



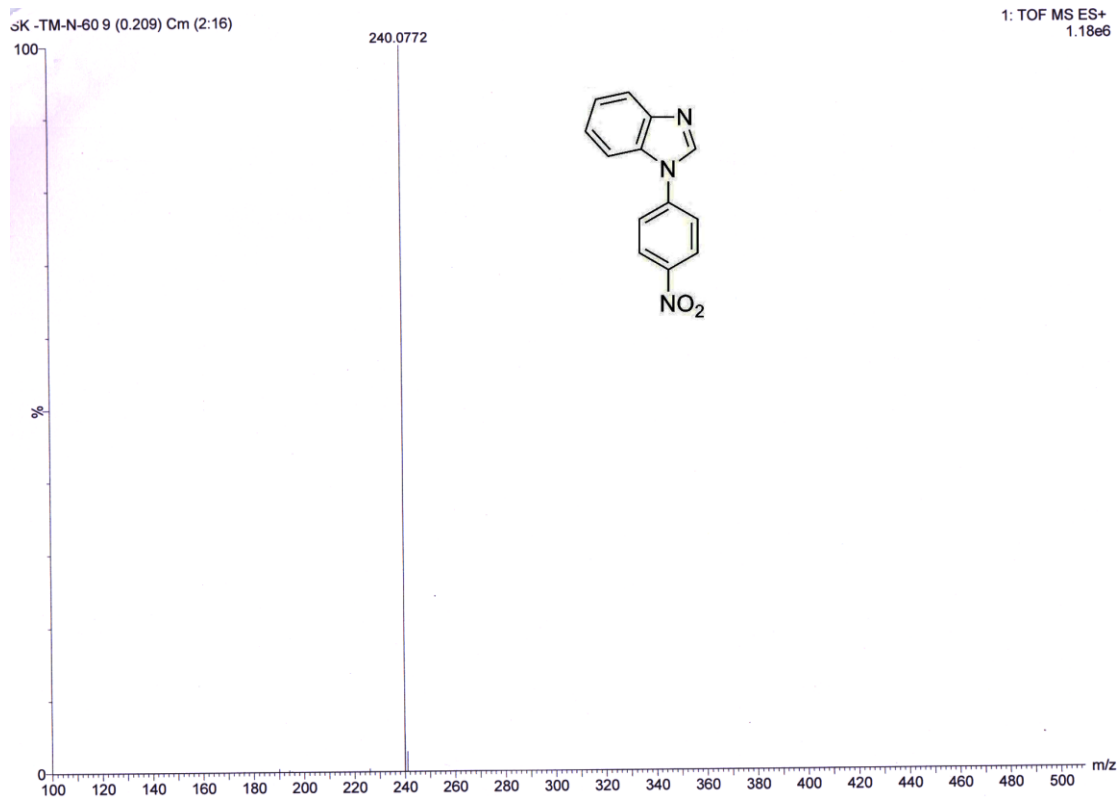

1,2,4-triazole-*o*-nitrobenzene (Table 2, entry 2m):  $^1\text{H-NMR}$  (300 MHz,  $\text{CDCl}_3$ ):  $\delta$  (ppm): 8.4 (s, 1H), 8.09 (s, 1H), 8.02-7.99 (m, 1H), 7.76-7.73 (m, 1H), 7.68-7.64 (m, 1H), 7.62-7.56 (m, 1H);  $^{13}\text{C-NMR}$  (75 MHz,  $\text{CDCl}_3$ ):  $\delta$  (ppm): 153.05, 144.5, 143.83, 133.78, 130.41, 130.1, 127.4, 125.5; HRMS (ESI): calcd. for  $[\text{M}+\text{H}]^+$  ( $\text{C}_8\text{H}_7\text{N}_4\text{O}_2$ ) requires  $m/z$  191.0569, found 191.0564; Anal. Calcd. for  $\text{C}_8\text{H}_6\text{N}_4\text{O}_2$ : C, 50.53%; H, 3.18%; N, 29.46%. Found: C, 50.55%; H, 3.19%; N, 29.44%.

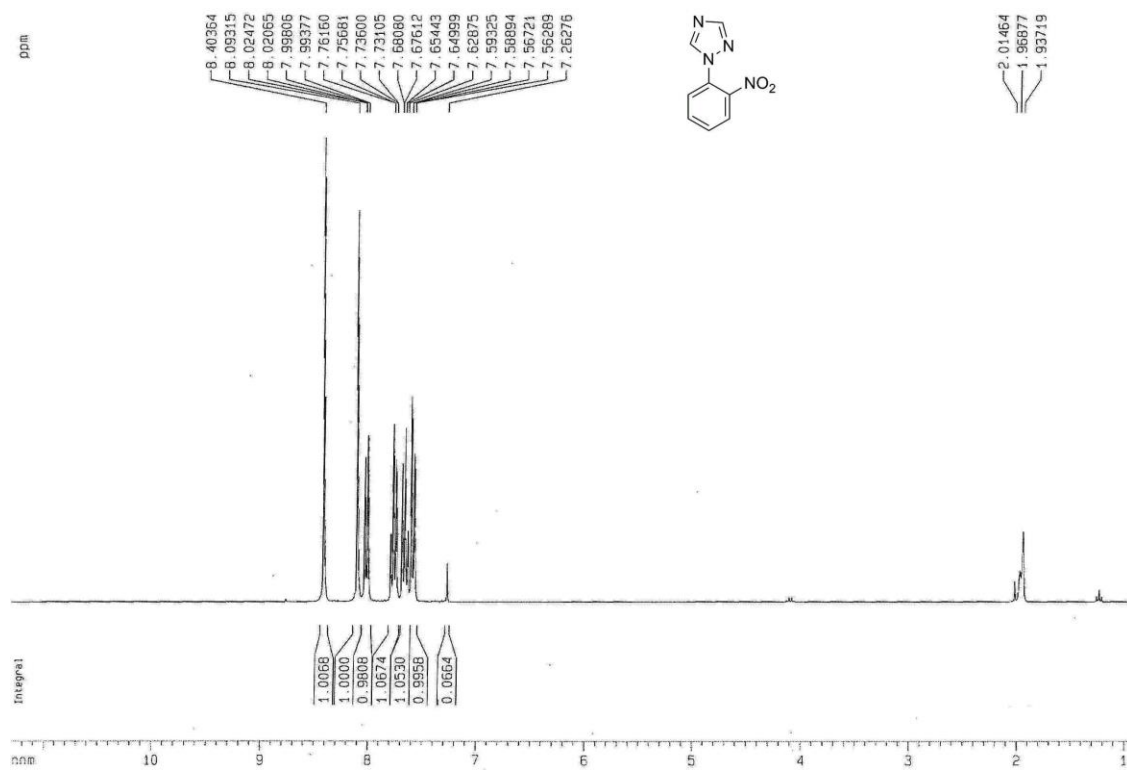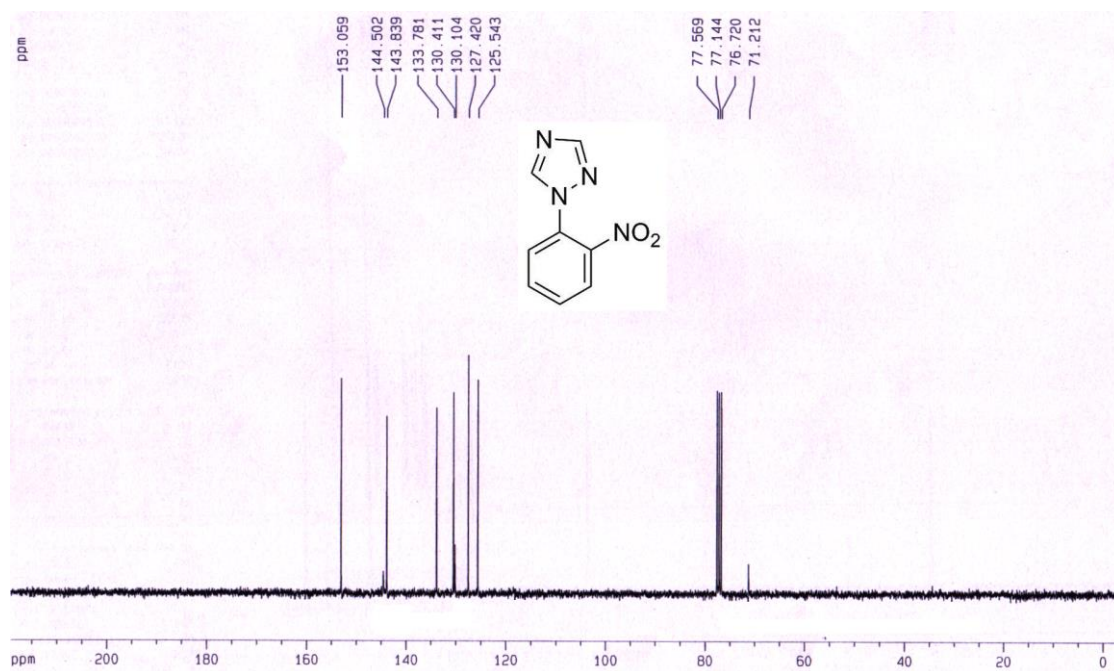

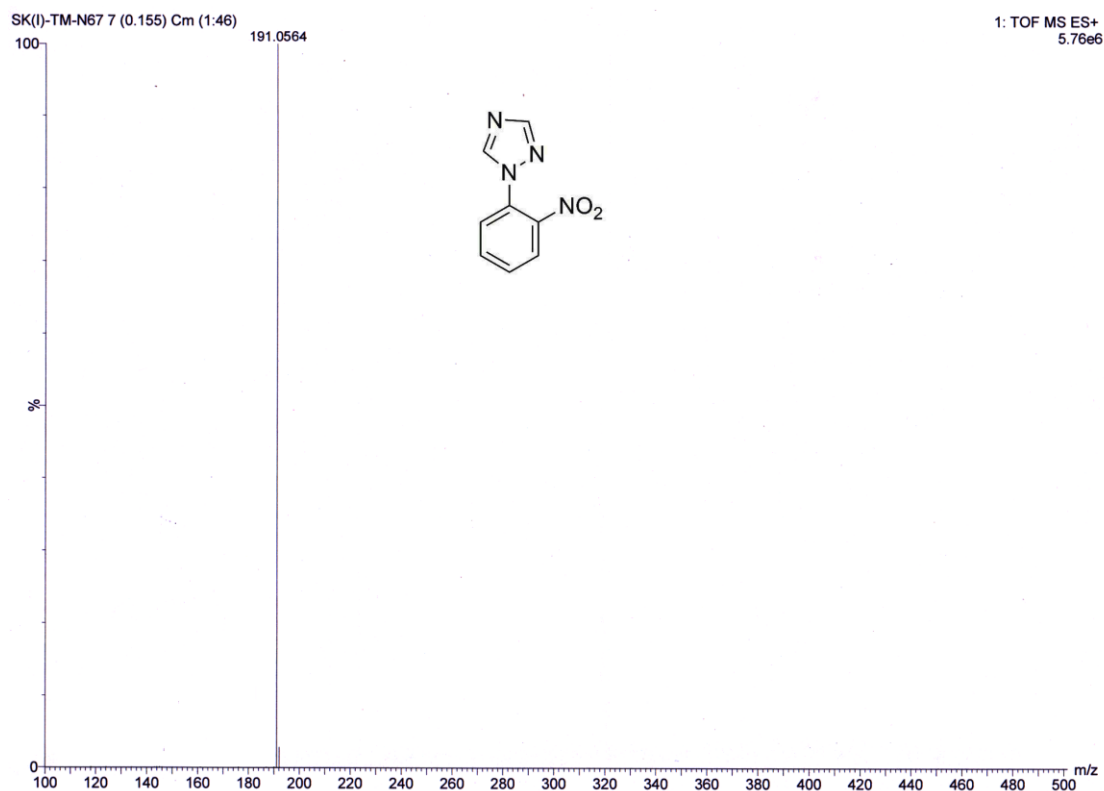

1,2,4-triazole-*p*-benzonitrile (Table 2, entry 2n):  $^1\text{H-NMR}$  (300 MHz,  $\text{CDCl}_3$ ):  $\delta$  (ppm): 8.67 (s, 1H), 8.15 (s, 1H), 7.88-7.81 (m, 4H);  $^{13}\text{C-NMR}$  (75 MHz,  $\text{CDCl}_3$ ):  $\delta$  (ppm): 153.32, 141.10, 139.90, 133.98, 120.01, 117.76, 111.82; HRMS (ESI): calcd. for  $[\text{M}+\text{H}]^+$  ( $\text{C}_{14}\text{H}_{10}\text{N}_3$ ) requires  $m/z$  171.0626, found 171.0590; Anal. Calcd. for  $\text{C}_9\text{H}_6\text{N}_4$ : C, 63.52%; H, 3.55%; N, 32.92. Found: C, 63.63%; H, 3.61%, N, 32.95.

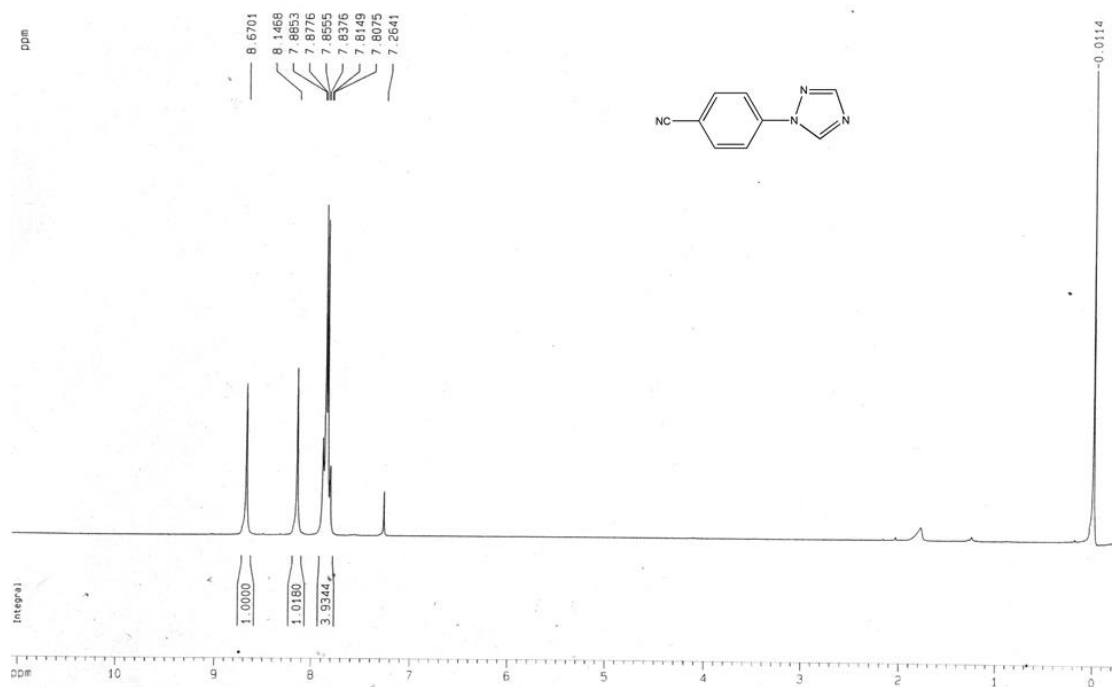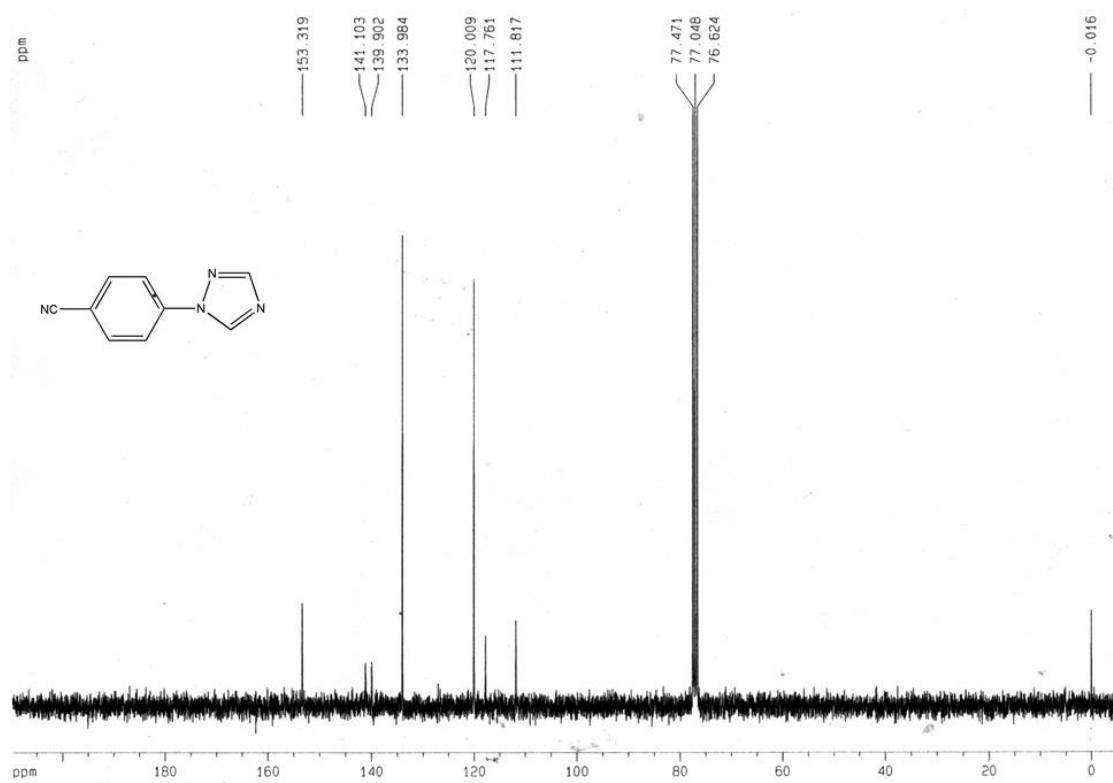

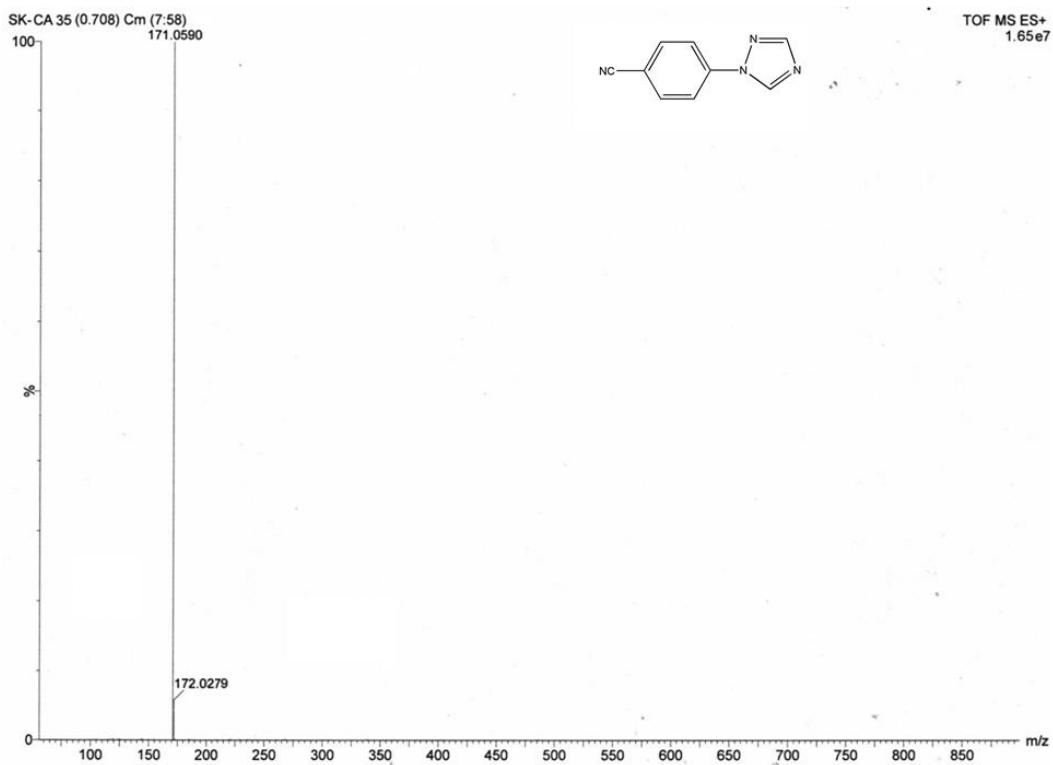

1,2,3-triazole-*p*-benzonitrile (Table 2, entry 2o):  $^1\text{H-NMR}$  (300 MHz,  $\text{CDCl}_3$ ):  $\delta$  (ppm): 8.09 (s, 1H), 7.95-7.83 (m, 5H);  $^{13}\text{C-NMR}$  (75 MHz,  $\text{CDCl}_3$ ):  $\delta$  (ppm): 139.84, 135.12, 133.97, 121.58, 120.74, 117.69, 112.48; HRMS (ESI): calcd. for  $[\text{M}+\text{H}]^+$  ( $\text{C}_{14}\text{H}_{10}\text{N}_3$ ) requires  $m/z$  171.0626, found 171.0591; Anal. Calcd. for  $\text{C}_9\text{H}_6\text{N}_4$ : C, 63.52%; H, 3.55%; N, 32.92. Found: C, 63.49%; H, 3.50%, N, 32.85.

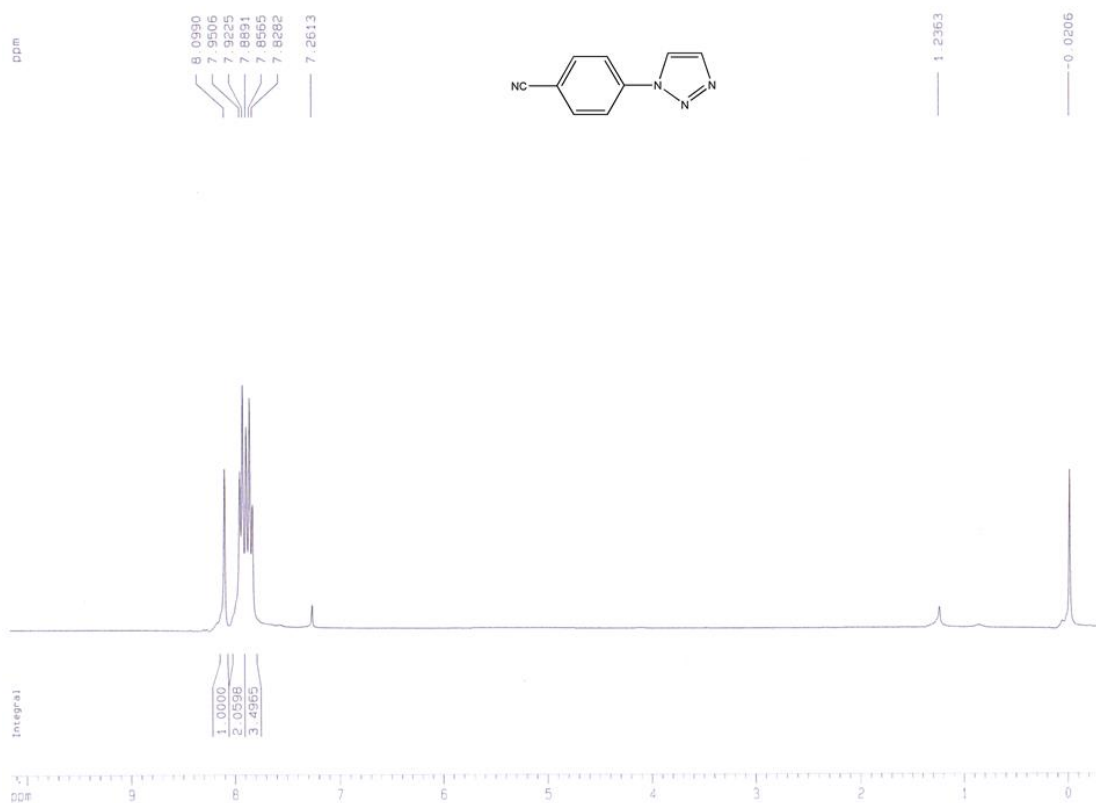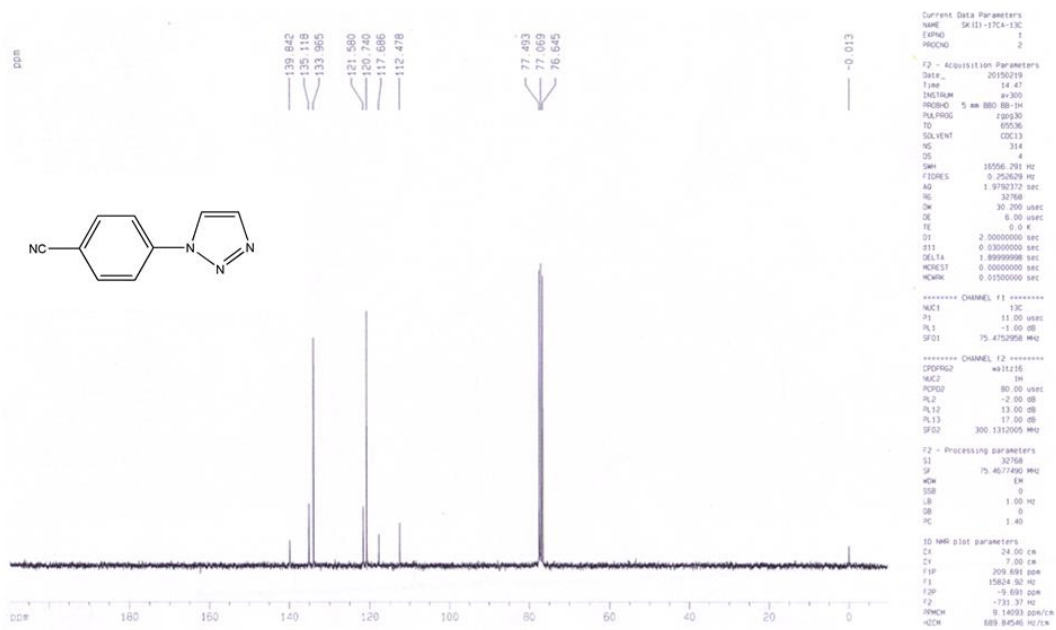

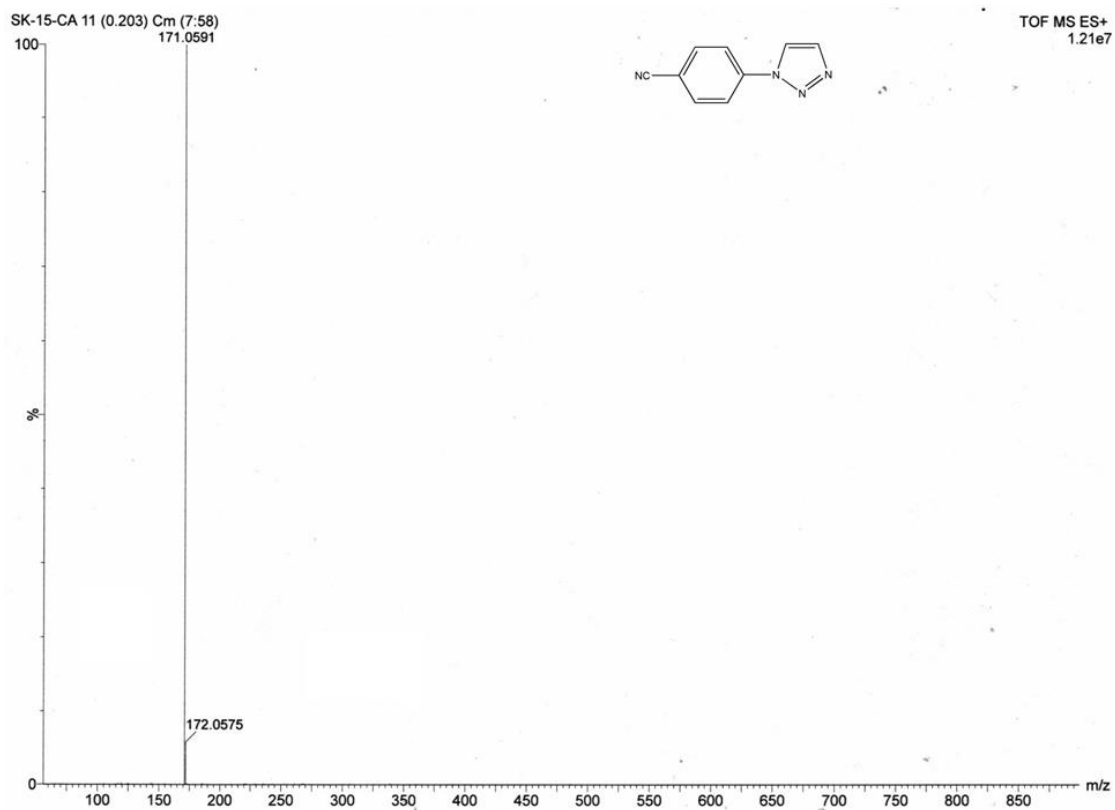

1,2,3-triazole-*o*-nitrobenzene (Table 2, entry 2p):  $^1\text{H-NMR}$  (300 MHz,  $\text{CDCl}_3$ ):  $\delta$  (ppm): 7.93-7.90 (m, 1H), 7.89-7.81 (m, 3H), 7.70-7.67 (m, 1H), 7.57-7.54 (m, 1H);  $^{13}\text{C-NMR}$  (75 MHz,  $\text{CDCl}_3$ ):  $\delta$  (ppm): 153.06, 144.5, 143.84, 133.78, 130.41, 130.10, 127.42, 125.54; HRMS (ESI): calcd. for  $[\text{M}+\text{H}]^+$  ( $\text{C}_8\text{H}_7\text{N}_4\text{O}_2$ ) requires  $m/z$  191.0569, found 191.0569; Anal. Calcd. for  $\text{C}_8\text{H}_6\text{N}_4\text{O}_2$ : C, 50.53%; H, 3.18%; N, 29.46%. Found: C, 50.51%; H, 3.19%; N, 29.43%.

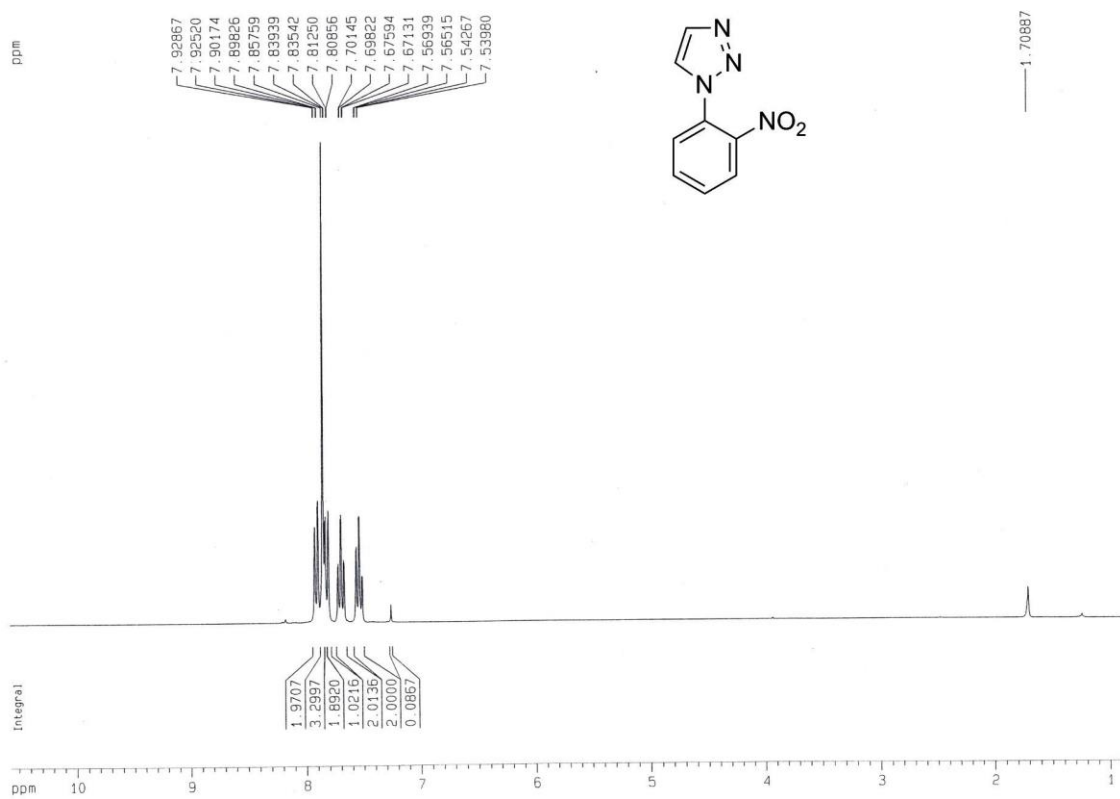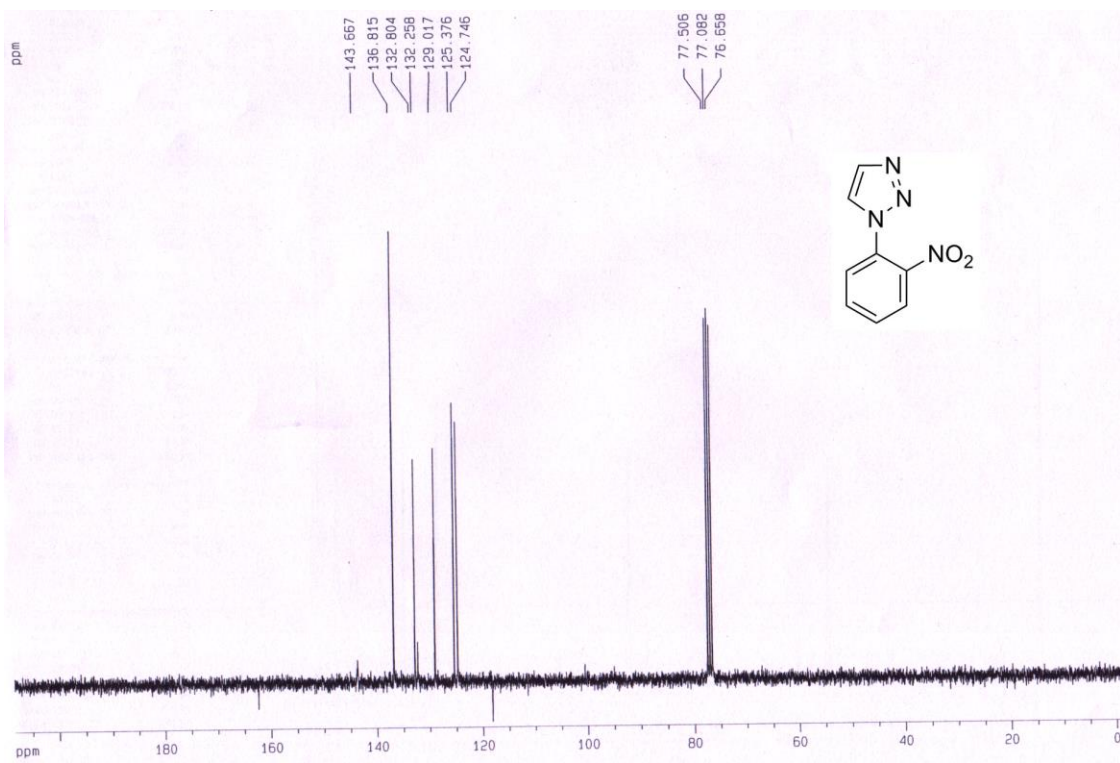



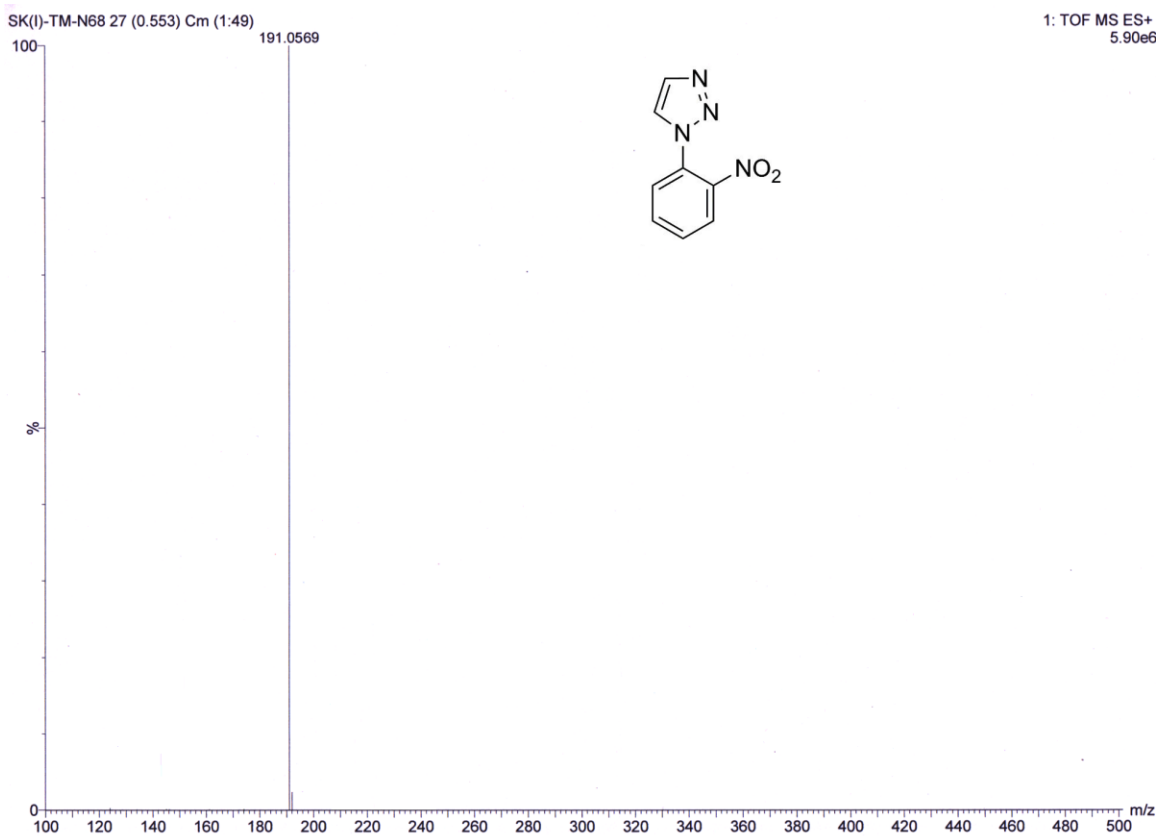

N-(4-nitrobenzene)-4-methylaniline (Table 2, entry 2q):  $^1\text{H-NMR}$  (300 MHz,  $\text{CDCl}_3$ ):  $\delta$  (ppm): 8.13-8.07 (m, 2H), 7.20-7.09 (m, 3H), 6.88-6.85 (m, 1H), 6.61-6.58 (m, 2H), 6.31 (s, 1H), 2.35 (s, 3H);  $^{13}\text{C-NMR}$  (75 MHz,  $\text{CDCl}_3$ ):  $\delta$  (ppm): 150.88, 139.39, 134.78, 130.28, 126.25, 126.11, 122.66, 113.20, 20.92; HRMS (ESI): calcd. for  $[\text{M}+\text{H}]^+$  ( $\text{C}_{13}\text{H}_{13}\text{N}_2\text{O}_2$ ) requires  $m/z$  229.0898, found 229.0977; Anal. Calcd. for  $\text{C}_{13}\text{H}_{12}\text{N}_2\text{O}_2$ : C, 68.41%; H, 5.30%; N, 12.27%. Found: C, 68.51%; H, 5.39%; N, 12.29%.

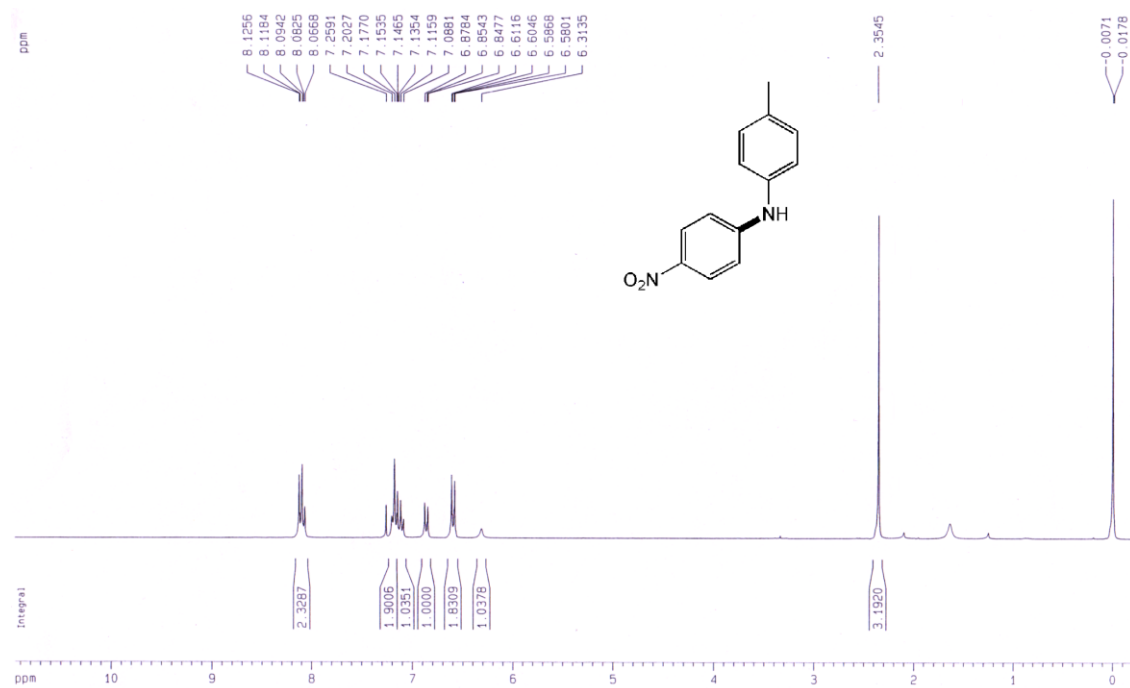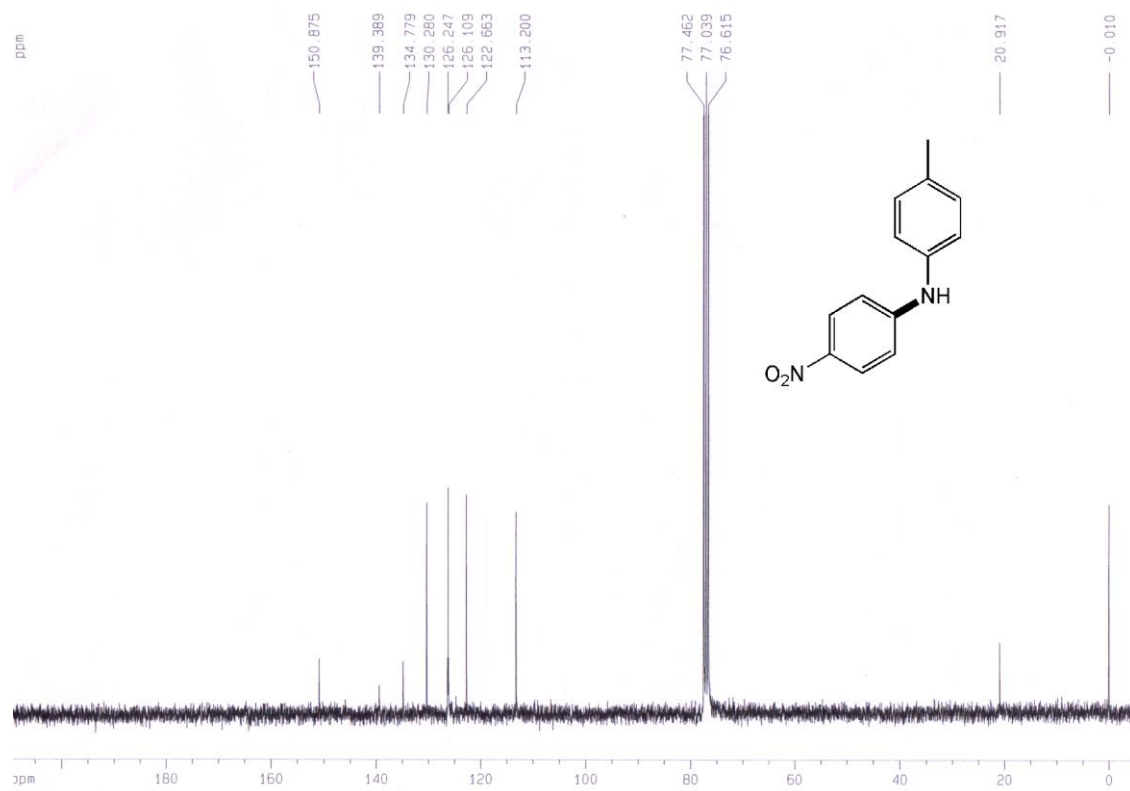

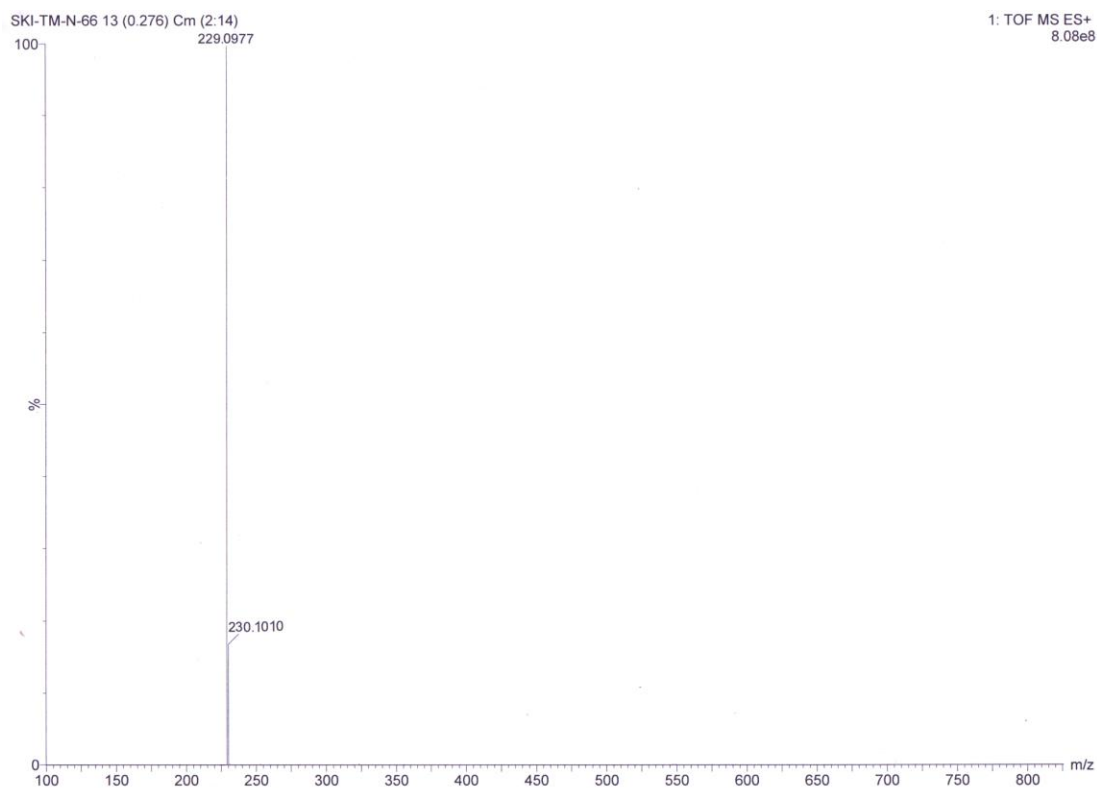

N-(4-nitrobenzene)-6-aminoflavone (Table 2, entry 2r):  $^1\text{H-NMR}$  (300 MHz,  $\text{DMSO-d}_6$ ):  $\delta$  (ppm): 8.28 (d,  $J = 8.6\text{Hz}$ , 3H), 8.09-8.02 (m, 5H), 7.72 (s, 1H), 7.56 (d,  $J = 4.5\text{Hz}$ , 3H), 7.48 (d,  $J = 8.8\text{Hz}$ , 1H);  $^{13}\text{C-NMR}$  (75 MHz,  $\text{CDCl}_3$ ):  $\delta$  (ppm): 179.33, 159.59, 148.60, 146.51, 138.68, 132.52, 130.94, 128.59, 128.08, 126.81, 125.10, 124.70, 121.66, 120.38, 118.15, 117.64, 110.39; HRMS (ESI): calcd. for  $[\text{M}+\text{H}]^+$  ( $\text{C}_{21}\text{H}_{15}\text{N}_2\text{O}_4$ ) requires  $m/z$  359.0953, found 359.0951; Anal. Calcd. for  $\text{C}_{21}\text{H}_{14}\text{N}_2\text{O}_4$ : C, 70.39%; H, 3.94%; N, 7.82%. Found: C, 70.41%; H, 3.89%; N, 7.89%.

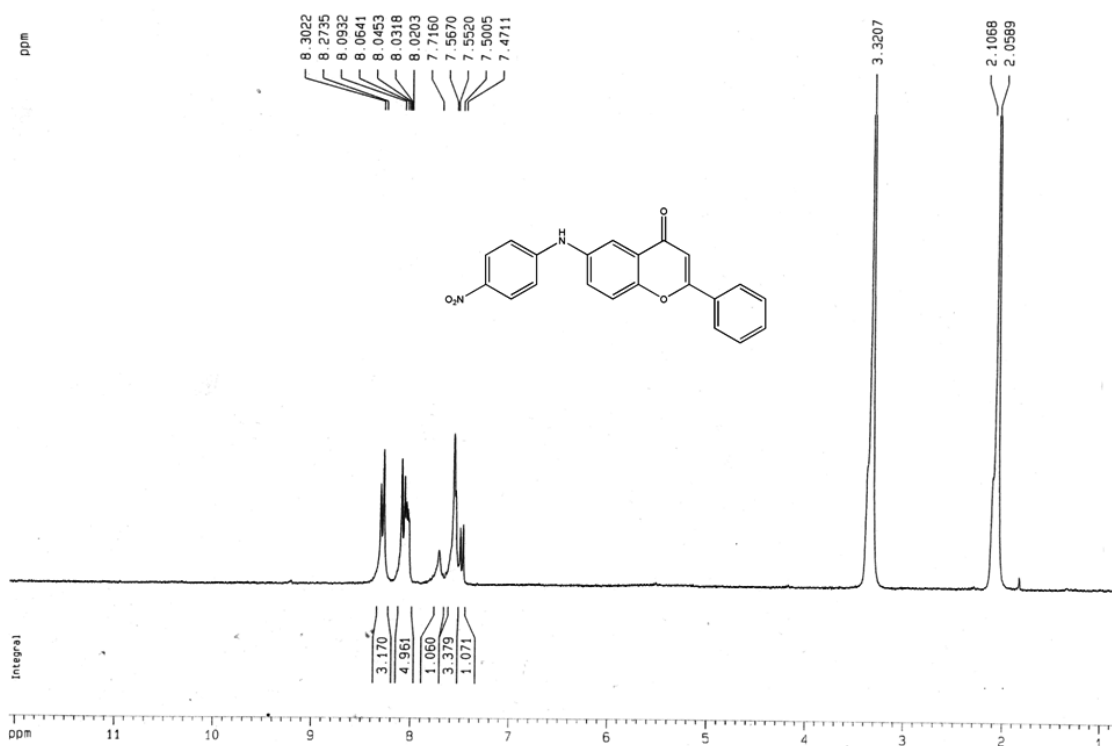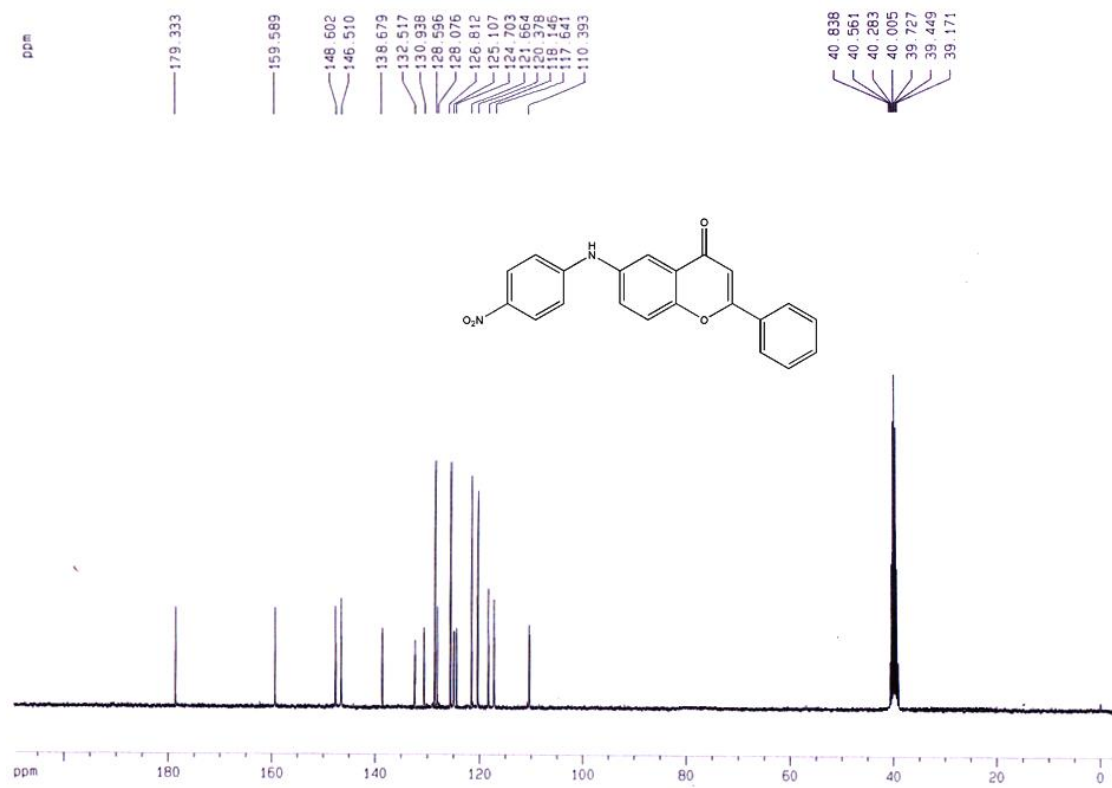

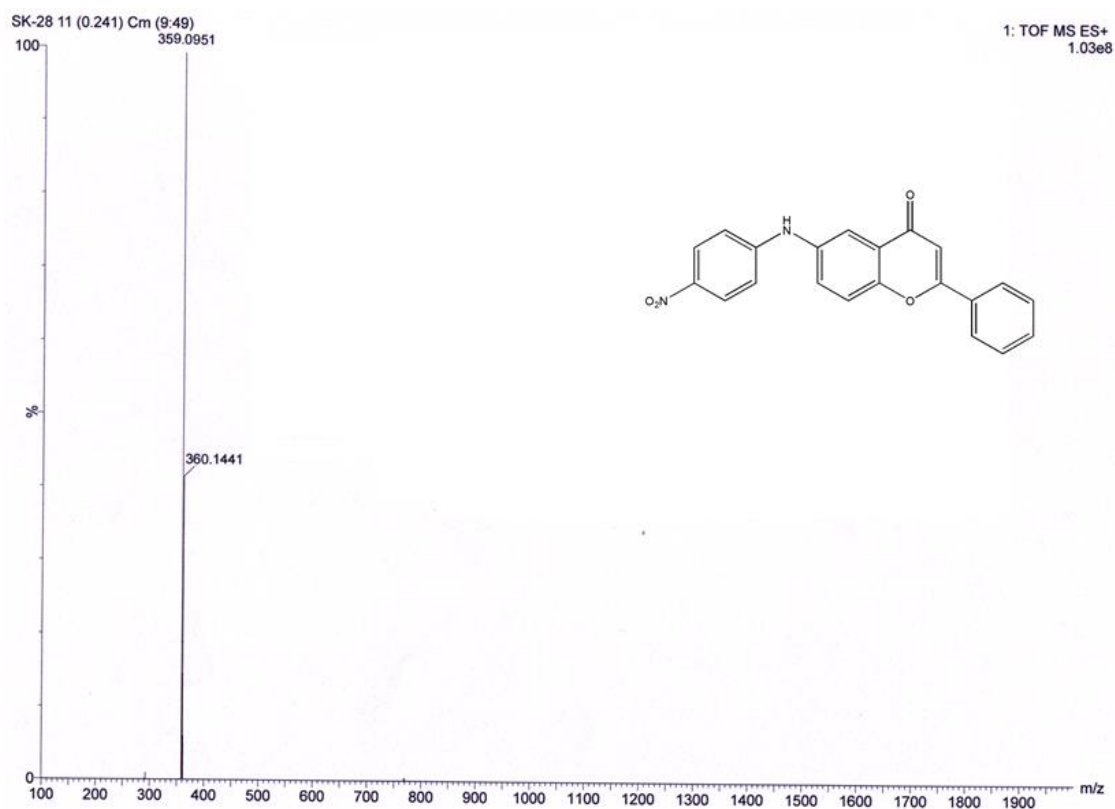

2-(4-methylphenyl)-benzimidazole-*p*-nitrobenzene (Table 2, entry 2s):  $^1\text{H-NMR}$  (300 MHz,  $\text{CDCl}_3$ ):  $\delta$  (ppm): 8.38-8.35 (m, 2H), 7.89 (m, 1H), 7.51-7.48 (m, 2H), 7.39-7.29 (m, 5H), 7.14 (d,  $J = 7.9$  Hz, 2H), 2.38 (s, 3H);  $^{13}\text{C-NMR}$  (75 MHz,  $\text{CDCl}_3$ ):  $\delta$  (ppm): 152.49, 147.08, 142.94, 142.56, 140.53, 136.07, 129.79, 129.48, 129.21, 127.97, 126.39, 126.07, 125.91, 125.30, 124.04, 123.85, 120.09, 115.83, 109.92, 21.40; HRMS (ESI): calcd. for  $[\text{M}+\text{H}]^+$  ( $\text{C}_{20}\text{H}_{16}\text{N}_3\text{O}_4$ ) requires  $m/z$  330.1164, found 330.1151; Anal. Calcd. for  $\text{C}_{20}\text{H}_{15}\text{N}_3\text{O}_4$ : C, 72.94%; H, 4.59%; N, 12.79%. Found: C, 72.91%; H, 4.64%; N, 12.86%.

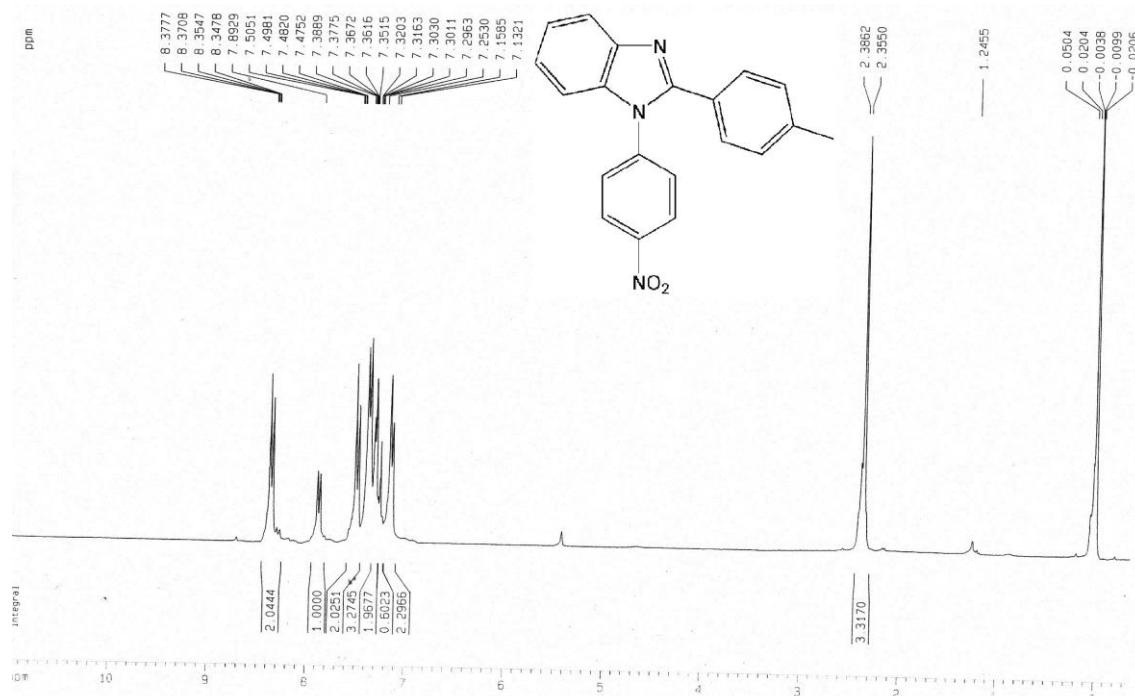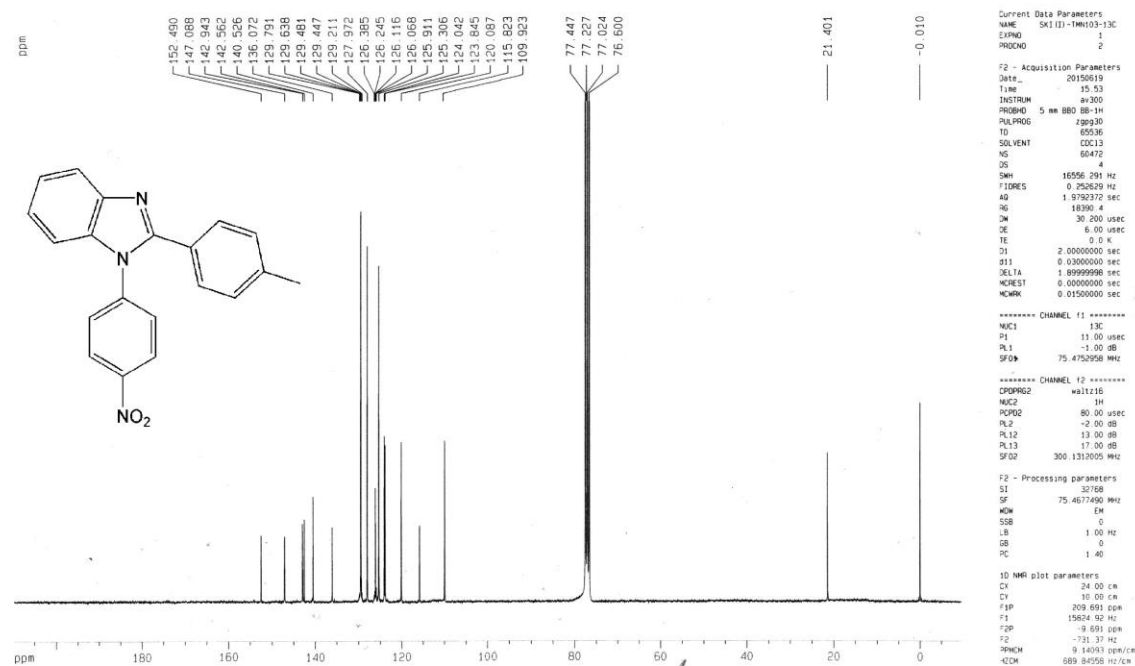

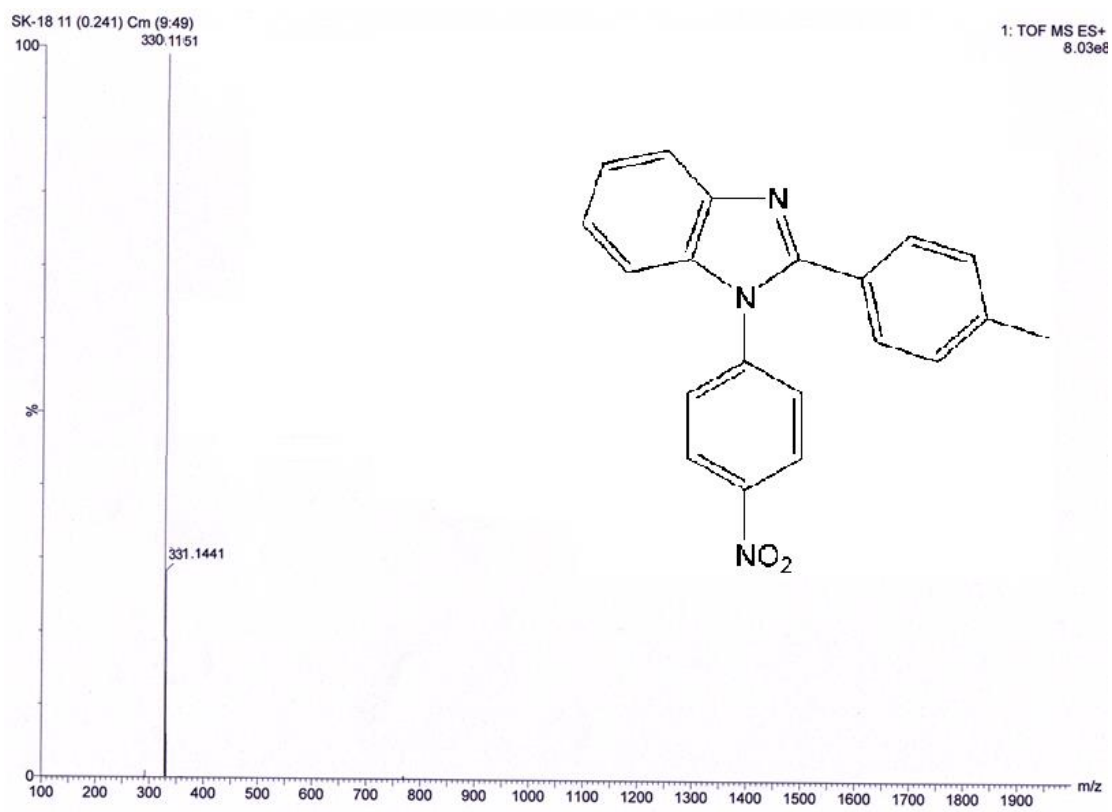

Supplement: d0nj05711h1.pdf [file d0nj05711h1.pdf]
